# Supplementary material for: In silico profiling for secondary metabolites from Lepidium meyenii (maca) by the pharmacophore and ligand-shape-based joint approach
Source: PubMed Central journal article supplement (PMC5037646; doi:10.1186/s13020-016-0112-y), 2016-09-26
Supplement: 13020_2016_112_MOESM3_ESM.pdf [file 13020_2016_112_MOESM3_ESM.pdf]

## Report of GeneMANIA search

### Network image

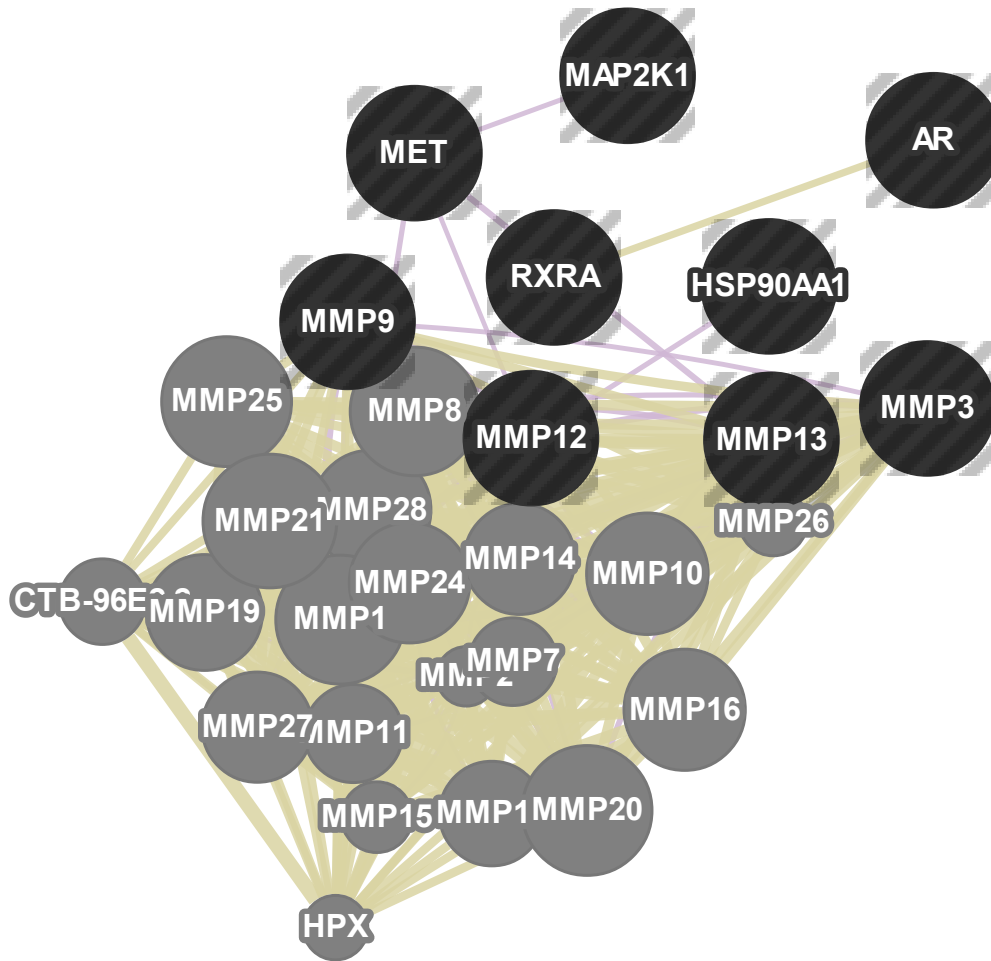

Functions legend

■ query genes

Networks legend

■ Co-expression

■ Shared protein domains

## Search parameters

Organism: *H. sapiens* (human)

Genes: P07900; P14780; P08581; P45452; P08254; Q02750; P10275; P19793; P39900

Networks:

### Attributes:

#### Co-expression:

Alizadeh-Staudt-2000 Arijs-Rutgeerts-2009 Bahr-Bowler-2013 Bild-Nevins-2006 B  
 Boldrick-Relman-2002 Burington-Shaughnessy-2008 Chen-Brown-2002 Cheok-Evans-2003  
 Gysin-McMahon-2012 Innocenti-Brown-2011 Kang-Willman-2010 Mallon-McKay-2013  
 Perou-Botstein-1999 Ramaswamy-Golub-2001 Rieger-Chu-2004 Roth-Zlotnik-2006  
 Salaverria-Siebert-2011 Smirnov-Cheung-2009 Wang-Maris-2006 Wu-Garvey-2007

#### Co-localization:

Johnson-Shoemaker-2003 Satoh-Yamamoto-2013 Schadt-Shoemaker-2004

#### Genetic interactions:

BIOGRID-SMALL-SCALE-STUDIES IREF-SMALL-SCALE-STUDIES Lin-Boeke-2012 A Lin-Boeke-2012 B  
 Lin-Smith-2010 Toyoshima-Grandori-2012 Willingham-Muchowski-2003

#### Pathway:

PATHWAYCOMMONS-CELL\_MAP PATHWAYCOMMONS-HUMANCYC PATHWAYCOMMONS-IMID  
 PATHWAYCOMMONS-NCI\_NATURE PATHWAYCOMMONS-REACTOME Wu-Stein-2010

#### Physical interactions:

Abu-Odeh-Aqeilan-2014 Agrawal-Sedivy-2010 Aichele-Groettrup-2012 Albers-Koegl-2005  
 Alexandru-Deshais-2008 Altun-Kessler-2011 Andresen-Flores-Morales-2014 Arbuckle-Grant-2010  
 Arora-Mercola-2008 BIOGRID-SMALL-SCALE-STUDIES Bandyopadhyay-Ideker-2010  
 Bantscheff-Drewes-2011 Barr-Knapp-2009 Barrios-Rodiles-Wrana-2005 Behrends-Harper-2010  
 Behzadnia-Lührmann-2007 Bennett-Harper-2010 Benzinger-Hermeking-2005 Berggård-James-2006  
 Bett-Hay-2013 Blandin-Richard-2013 Bouwmeester-Superti-Furga-2004 Brajenovic-Drewes-2004  
 Brehme-Superti-Furga-2009 Bruderer-Hay-2011 Byron-Humphries-2012 Cai-Conaway-2007  
 Camargo-Brandon-2007 Cannavo-Jiricny-2007 Cao-Chinnaiyan-2014 Chen-Ge-2013 Chen-Naus-2012  
 Chen-Zhang-2013 Cheng-Chen-2010 Cloutier-Coulombe-2013 Colland-Gauthier-2004  
 Couzens-Gingras-2013 Cox-Rizzino-2013 Danielsen-Nielsen-2011 Dyer-Sobral-2010  
 Emanuele-Elledge-2011 Ewing-Figeys-2007 Fenner-Prehn-2010 Foerster-Ritter-2013  
 Foster-Marshall-2013 Freibaum-Taylor-2010 Gao-Reinberg-2012 Gautier-Hall-2009 Giannone-Liu-2010  
 Glatter-Gstaiger-2009 Gloeckner-Ueffing-2007 Goehler-Wanker-2004 Golebiowski-Hay-2009  
 Goudreaux-Gingras-2009 Grant-2010 Greco-Cristea-2011 Havrylov-Redowicz-2009  
 Havugimana-Emili-2012 Hayes-Urbé-2012 Hegele-Stelzl-2012 A Hegele-Stelzl-2012 B  
 Humphries-Humphries-2009 Hutchins-Peters-2010 IREF-BIND IREF-BIOGRID IREF-DIP IREF-HPRD  
 IREF-INNATEDB IREF-INTACT IREF-MATRIXDB IREF-MPPI IREF-OPHID IREF-PUBMED  
 IREF-SMALL-SCALE-STUDIES Ingham-Pawson-2005 Jeronimo-Coulombe-2007 Jin-Pawson-2004  
 Jones-MacBeath-2006 Joshi-Cristea-2013 Jäger-Krogan-2012 Kahle-Zoghbi-2011 Kim-Gygi-2011  
 Kneissl-Grummt-2003 Koch-Hermeking-2007 Kristensen-Foster-2012 Lau-Ronai-2012  
 Lee-Doedens-2011 Lee-Songyang-2011 Lehner-Sanderson-2004 A Lehner-Sanderson-2004 B  
 Leng-Wang-2014 Li-Dorf-2011 A Li-Dorf-2011 B Lim-Zoghbi-2006 Liu-Wang-2012  
 Loch-Strickler-2012 Lopitz-Otsoa-Rodriguez-2012 Lu-Zhang-2013 Mak-Moffat-2010  
 Malovannaya-Qin-2010 Markson-Sanderson-2009 Maréchal-Zou-2014 Matafora-Bachi-2009  
 Matsumoto-Nakayama-2005 McCracken-Blencowe-2005 McFarland-Nussbaum-2008  
 Meek-Piwonica-Worms-2004 Meierhofer-Kaiser-2008 Miyamoto-Sato-Yanagawa-2010  
 Nakayama-Ohara-2002 Nakayasu-Adkins-2013 Napolitano-Meroni-2011 Nathan-Goldberg-2013  
 Neganova-Lako-2011 Newman-Keating-2003 Olma-Pintard-2009 Oláh-Ovádi-2011  
 Oshikawa-Nakayama-2012 Ouyang-Gill-2009 Panigrahi-Pati-2012 Perez-Hernandez-Yáñez-Mó-2013  
 Persaud-Rotin-2009 Pichlmair-Superti-Furga-2011 Pichlmair-Superti-Furga-2012 Pilot-Storck-Goillot-2010  
 Povlsen-Choudhary-2012 Ramachandran-LaBaer-2004 Ravasi-Hayashizaki-2010 Reinke-Keating-2013  
 Richter-Chrzanowska-Lightowlers-2010 Roux-Burke-2012 Rowbotham-Mermoud-2011 Roy-Parent-2013  
 Rual-Vidal-2005 A Rual-Vidal-2005 B San-Marina-Minden-2008 Sang-Jackson-2011  
 Sato-Conaway-2004 Shi-Qin-2011 Singh-Moore-2012 Soler-López-Aloy-2011 Sowa-Harper-2009  
 Stehling-Lill-2012 Stelzl-Wanker-2005 Suter-Wanker-2013 Taipale-Lindquist-2012  
 Takahashi-Conaway-2011 Tarallo-Weisz-2011 Tatham-Hay-2011 Teixeira-Gomes-2010  
 Thalappilly-Duseti-2008 Tsai-Cristea-2012 Udeshi-Carr-2012 Vandamme-Angrand-2011  
 Vanderwerf-Bagby-2009 Varjosalo-Gstaiger-2013 A Varjosalo-Gstaiger-2013 B  
 Varjosalo-Superti-Furga-2013 Venkatesan-Vidal-2009 Vinayagam-Wanker-2011 Wagner-Choudhary-2011  
 Wallach-Kramer-2013 Wang-Balch-2006 Wang-He-2008 Wang-Yang-2011 Weimann-Stelzl-2013 A  
 Weimann-Stelzl-2013 B Weinmann-Meister-2009 Wilker-Yaffe-2007 Wong-O'Bryan-2012  
 Woods-Monteiro-2012 Woodsmith-Sanderson-2012 Wu-Li-2007 Wu-Ma-2012 Xiao-Lefkowitz-2007

Xie-Cong-2013 Xu-Jaffrey-2010 Xu-Ye-2012 Yang-Chen-2010 Yatim-Benkirane-2012 Yu-Chow-2013  
 Yu-Vidal-2011 Zanon-Pichler-2013 Zhang-Zou-2011 Zhao-Krug-2005 Zhao-Yang-2011  
 Zhou-Conrads-2004 Zhou-Liang-2012 de Hoog-Mann-2004 van Wijk-Timmers-2009

**Predicted:**

I2D-BIND-Fly2Human I2D-BIND-Mouse2Human I2D-BIND-Rat2Human I2D-BIND-Worm2Human  
 I2D-BIND-Yeast2Human I2D-BioGRID-Fly2Human I2D-BioGRID-Mouse2Human I2D-BioGRID-Rat2Human  
 I2D-BioGRID-Worm2Human I2D-BioGRID-Yeast2Human  
 I2D-Chen-Pawson-2009-PiwiScreen-Mouse2Human I2D-Formstecher-Daviet-2005-Embryo-Fly2Human  
 I2D-Giot-Rothbert-2003-Low-Fly2Human I2D-INNATEDB-Mouse2Human I2D-IntAct-Fly2Human  
 I2D-IntAct-Mouse2Human I2D-IntAct-Rat2Human I2D-IntAct-Worm2Human I2D-IntAct-Yeast2Human  
 I2D-Krogan-Greenblatt-2006-Core-Yeast2Human I2D-Krogan-Greenblatt-2006-NonCore-Yeast2Human  
 I2D-Li-Vidal-2004-CORE-1-Worm2Human I2D-Li-Vidal-2004-non-core-Worm2Human  
 I2D-MGI-Mouse2Human I2D-MINT-Fly2Human I2D-MINT-Mouse2Human I2D-MINT-Rat2Human  
 I2D-MINT-Worm2Human I2D-MINT-Yeast2Human I2D-Manual-Mouse2Human I2D-Manual-Rat2Human  
 I2D-Ptacek-Snyder-2005-Yeast2Human I2D-Tarassov-PCA-Yeast2Human  
 I2D-Tewari-Vidal-2004-TGFb-Worm2Human I2D-Wang-Orkin-2006-EScmplx-Mouse2Human  
 I2D-Wang-Orkin-2006-EScmplxlow-Mouse2Human I2D-Yu-Vidal-2008-GoldStd-Yeast2Human  
 I2D-vonMering-Bork-2002-High-Yeast2Human I2D-vonMering-Bork-2002-Low-Yeast2Human  
 I2D-vonMering-Bork-2002-Medium-Yeast2Human Stuart-Kim-2003

**Shared protein domains:**

INTERPRO PFAM

Network weighting: Automatically selected weighting method (Assigned based on query genes)

Number of gene results: 20

## Networks

|                                                                                                                                                                                                                            |                |
|----------------------------------------------------------------------------------------------------------------------------------------------------------------------------------------------------------------------------|----------------|
| <b>Shared protein domains</b>                                                                                                                                                                                              | <b>67.23 %</b> |
| <b>PFAM</b>                                                                                                                                                                                                                | <b>34.59 %</b> |
| Source: <a href="#">Pearson correlation</a> with 543,464 interactions from <a href="#">Pfam</a>                                                                                                                            |                |
| <b>INTERPRO</b>                                                                                                                                                                                                            | <b>32.64 %</b> |
| Source: <a href="#">Pearson correlation</a> with 562,560 interactions from <a href="#">InterPro</a>                                                                                                                        |                |
| <b>Co-expression</b>                                                                                                                                                                                                       | <b>32.77 %</b> |
| <b>Arijs-Rutgeerts-2009</b>                                                                                                                                                                                                | <b>8.33 %</b>  |
| <a href="#">Mucosal gene expression of antimicrobial peptides in inflammatory bowel disease before and after first infliximab treatment.</a> Arijs et al. (2009). <i>PLoS One</i> .                                        |                |
| Source: <a href="#">Pearson correlation</a> with 653,194 interactions from <a href="#">GEO</a>                                                                                                                             |                |
| Tags: immune system                                                                                                                                                                                                        |                |
| <b>Wang-Maris-2006</b>                                                                                                                                                                                                     | <b>5.86 %</b>  |
| <a href="#">Integrative genomics identifies distinct molecular classes of neuroblastoma and shows that multiple genes are targeted by regional alterations in DNA copy number.</a> Wang et al. (2006). <i>Cancer Res</i> . |                |
| Source: <a href="#">Pearson correlation</a> with 264,234 interactions from <a href="#">GEO</a>                                                                                                                             |                |
| Tags: transcription factors; cancer                                                                                                                                                                                        |                |
| <b>Ramaswamy-Golub-2001</b>                                                                                                                                                                                                | <b>5.24 %</b>  |
| <a href="#">Multiclass cancer diagnosis using tumor gene expression signatures.</a> Ramaswamy et al. (2001). <i>Proc Natl Acad Sci U S A</i> .                                                                             |                |
| Source: <a href="#">Pearson correlation</a> with 270,142 interactions from supplementary material                                                                                                                          |                |
| Tags: cancer                                                                                                                                                                                                               |                |
| <b>Salaverria-Siebert-2011</b>                                                                                                                                                                                             | <b>4.88 %</b>  |
| <a href="#">Translocations activating IRF4 identify a subtype of germinal center-derived B-cell lymphoma affecting predominantly children and young adults.</a> Salaverria et al. (2011). <i>Blood</i> .                   |                |
| Source: <a href="#">Pearson correlation</a> with 514,070 interactions from <a href="#">GEO</a>                                                                                                                             |                |
| Tags: transcription factors; cancer                                                                                                                                                                                        |                |
| <b>Chen-Brown-2002</b>                                                                                                                                                                                                     | <b>3.70 %</b>  |
| <a href="#">Gene expression patterns in human liver cancers.</a> Chen et al. (2002). <i>Mol Biol Cell</i> .                                                                                                                |                |
| Source: <a href="#">Pearson correlation</a> with 275,649 interactions from supplementary material                                                                                                                          |                |
| Tags: cell proliferation; transcription factors; liver; cancer                                                                                                                                                             |                |
| <b>Boldrick-Relman-2002</b>                                                                                                                                                                                                | <b>2.44 %</b>  |
| <a href="#">Stereotyped and specific gene expression programs in human innate immune responses to bacteria.</a> Boldrick et al. (2002). <i>Proc Natl Acad Sci U S A</i> .                                                  |                |
| Source: <a href="#">Pearson correlation</a> with 108,543 interactions from supplementary material                                                                                                                          |                |
| Tags: immune system                                                                                                                                                                                                        |                |
| <b>Alizadeh-Staudt-2000</b>                                                                                                                                                                                                | <b>2.31 %</b>  |
| <a href="#">Distinct types of diffuse large B-cell lymphoma identified by gene expression profiling.</a> Alizadeh et al. (2000). <i>Nature</i> .                                                                           |                |
| Source: <a href="#">Pearson correlation</a> with 88,888 interactions from supplementary material                                                                                                                           |                |
| Tags: cultured cells; cancer                                                                                                                                                                                               |                |

---

# Attributes

---

| <u>Attribute</u> | <u>Gene</u> |
|------------------|-------------|
|------------------|-------------|

# Genes

**MMP13 (P45452)** matrix metallopeptidase 13 (collagenase 3) [Source:HGNC Symbol;Acc:7159]

Functions:

Synonyms: ENSG00000137745; ENSG00000262325; ENSP00000260302; ENSP00000339672; ENSP00000460695; ENSP00000461440; 4322; MMP13; NP\_002418; NM\_002427; CLG3; MMP13\_HUMAN; P45452;

More at [Entrez](#)

**AR (P10275)** androgen receptor [Source:HGNC Symbol;Acc:644]

Functions:

Synonyms: ENSG00000169083; ENSP00000363822; ENSP00000379358; ENSP00000379359; ENSP00000421155; ENSP00000425199; 367; AR; NP\_000035; NP\_001011645; NM\_000044; NM\_001011645; AIS; DHTR; HUMARA; NR3C4; SBMA; SMAX1; ANDR\_HUMAN; P10275;

More at [Entrez](#)

**MMP3 (P08254)** matrix metallopeptidase 3 (stromelysin 1, progelatinase) [Source:HGNC Symbol;Acc:7173]

Functions:

Synonyms: ENSG00000149968; ENSG00000263313; ENSP00000299855; ENSP00000398346; ENSP00000435255; ENSP00000458496; ENSP00000459512; ENSP00000459712; 4314; MMP3; NP\_002413; NM\_002422; STMY; STMY1; MMP3\_HUMAN; P08254;

More at [Entrez](#)

**MMP12 (P39900)** matrix metallopeptidase 12 (macrophage elastase) [Source:HGNC Symbol;Acc:7158]

Functions:

Synonyms: ENSG00000262406; ENSP00000458585; 4321; MMP12; NP\_002417; NM\_002426; HME; MMP12\_HUMAN; P39900;

More at [Entrez](#)

**RXRA (P19793)** retinoid X receptor, alpha [Source:HGNC Symbol;Acc:10477]

Functions:

Synonyms: ENSG00000186350; ENSG00000269571; ENSP00000419692; ENSP00000442123; ENSP00000469111; ENSP00000470812; 6256; RXRA; NP\_002948; NM\_002957; NR2B1; P19793; RXRA\_HUMAN;

More at [Entrez](#)

**HSP90AA1 (P07900)** heat shock protein 90kDa alpha (cytosolic), class A member 1 [Source:HGNC Symbol;Acc:5253]

Functions:

Synonyms: ENSG0000080824; ENSP00000216281; ENSP00000335153; ENSP00000396189; ENSP00000450712; ENSP00000451400; ENSP00000452241; 3320; HSP90AA1; NP\_001017963; NP\_005339; NM\_001017963; NM\_005348; FLJ31884; Hsp89; Hsp90; HSP90N; HSPC1; HSPCA; HS90A\_HUMAN; P07900;

More at [Entrez](#)

**MET (P08581)** met proto-oncogene [Source:HGNC Symbol;Acc:7029]

Functions:

Synonyms: ENSG00000105976; ENSP00000317272; ENSP00000380860; ENSP00000398140;

ENSP00000398776; ENSP00000410980; ENSP00000413857; ENSP00000445020; 4233; MET; NP\_000236; NP\_001120972; NM\_000245; NM\_001127500; HGFR; RCCP2; MET\_HUMAN; P08581;

More at [Entrez](#)

**MMP9 (P14780)** matrix metalloproteinase 9 (gelatinase B, 92kDa gelatinase, 92kDa type IV collagenase) [Source:HGNC]

Functions:

1  2  3  4  5  6  7  8  9  10  11  12

Synonyms: ENSG00000100985; ENSP00000361405; 4318; MMP9; NP\_004985; NM\_004994; CLG4B; MMP9\_HUMAN; P14780;

More at [Entrez](#)

**MAP2K1 (Q02750)** mitogen-activated protein kinase kinase 1 [Source:HGNC Symbol;Acc:6840]

Functions:

1                 15

Synonyms: ENSG00000169032; ENSP00000302486; ENSP00000456438; 5604; MAP2K1; NP\_002746; NM\_002755; MAPKK1; MEK1; PRKMK1; MP2K1\_HUMAN; Q02750;

More at [Entrez](#)

**MMP21** matrix metalloproteinase 21 [Source:HGNC Symbol;Acc:14357] 4.76

Functions:

Synonyms: ENSG00000154485; ENSP00000357798; 118856; MMP21; NP\_671724; NM\_147191; MMP21\_HUMAN; Q8N119;

More at [Entrez](#)

**MMP25** matrix metalloproteinase 25 [Source:HGNC Symbol;Acc:14246] 4.71

Functions:

13  14

Synonyms: ENSG00000008516; ENSP00000337816; 64386; MMP25; NP\_071913; NM\_022468; MMPL1; MT6-MMP; MMP25\_HUMAN; Q9NPA2;

More at [Entrez](#)

**MMP20** matrix metalloproteinase 20 [Source:HGNC Symbol;Acc:7167] 4.71

Functions:

2  3  4  5  6  7  8  9

Synonyms: ENSG00000137674; ENSP00000260228; 9313; MMP20; NP\_004762; NM\_004771; MMP20\_HUMAN; O60882;

More at [Entrez](#)

**MMP1** matrix metalloproteinase 1 (interstitial collagenase) [Source:HGNC Symbol;Acc:7155] 4.70

Functions:

2  3  4  5  6  7  8  9  10  11  12

Synonyms: ENSG00000196611; ENSP00000322788; 4312; MMP1; NP\_001139410; NP\_002412; NM\_001145938; NM\_002421; MMP1\_HUMAN; P03956;

More at [Entrez](#)

**MMP8** matrix metalloproteinase 8 (neutrophil collagenase) [Source:HGNC Symbol;Acc:7175] 4.69

Functions:

2  3  4  5  6  7  8  9   11

Synonyms: ENSG00000118113; ENSP00000236826; ENSP00000401004; ENSP00000431431; ENSP00000431938; ENSP00000433812; ENSP00000437173; 4317; MMP8; NP\_002415; NM\_002424; CLG1; MMP8\_HUMAN; P22894;

More at [Entrez](#)

**MMP10** matrix metalloproteinase 10 (stromelysin 2) [Source:HGNC Symbol;Acc:7156] 4.59

Functions:

2  3  4  5  6  7  8  9

Synonyms: ENSG00000166670; ENSP00000279441; ENSP00000441485; 4319; MMP10; NP\_002416; NM\_002425; STMY2; MMP10\_HUMAN; P09238;

More at [Entrez](#)

**MMP16** matrix metallopeptidase 16 (membrane-inserted) [Source:HGNC Symbol;Acc:7162] 4.58

Functions:

4     8  9       15

Synonyms: ENSG00000156103; ENSP00000286614; ENSP00000429147; 4325; MMP16; NP\_005932; NM\_005941; C8orf57; DKFZp761D112; MT3-MMP; MMP16\_HUMAN; P51512;

More at [Entrez](#)

**MMP24** matrix metallopeptidase 24 (membrane-inserted) [Source:HGNC Symbol;Acc:7172] 4.57

Functions:

15

Synonyms: ENSG00000125966; ENSP00000246186; 10893; MMP24; NP\_006681; NM\_006690; MT5-MMP; MMP24\_HUMAN; Q9Y5R2;

More at [Entrez](#)

**MMP28** matrix metallopeptidase 28 [Source:HGNC Symbol;Acc:14366] 4.55

Functions:

10  11  12  13  14

Synonyms: ENSG00000129270; ENSG00000271447; ENSP00000250144; ENSP00000464731; ENSP00000466155; ENSP00000466671; ENSP00000467034; ENSP00000468241; ENSP00000468249; ENSP00000468709; ENSP00000473853; 79148; MMP28; NP\_001027449; NP\_077278; NM\_001032278; NM\_024302; EPILYSIN; MM28; MMP-25; MMP-28; MMP28\_HUMAN; Q9H239;

More at [Entrez](#)

**MMP19** matrix metallopeptidase 19 [Source:HGNC Symbol;Acc:7165] 4.51

Functions:

2  3  4  5  6  7  8  9     13  14

Synonyms: ENSG00000123342; ENSP00000313437; ENSP00000377736; ENSP00000386625; ENSP00000446776; ENSP00000446979; ENSP00000447363; ENSP00000449752; 4327; MMP19; NP\_001259030; NP\_002420; NM\_002429; MMP18; RASI-1; MMP19\_HUMAN; Q99542;

More at [Entrez](#)

**MMP14** matrix metallopeptidase 14 (membrane-inserted) [Source:HGNC Symbol;Acc:7160] 4.43

Functions:

2  3  4  5  6  7  8  9

Synonyms: ENSG00000157227; ENSP00000308208; ENSP00000446989; ENSP00000450323; 4323; MMP14; NP\_004986; NM\_004995; MT1-MMP; MMP14\_HUMAN; P50281;

More at [Entrez](#)

**MMP27** matrix metallopeptidase 27 [Source:HGNC Symbol;Acc:14250] 4.43

Functions:

Synonyms: ENSG00000137675; ENSP00000260229; 64066; MMP27; NP\_071405; NM\_022122; MMP27\_HUMAN; Q9H306;

More at [Entrez](#)

**MMP17** matrix metallopeptidase 17 (membrane-inserted) [Source:HGNC Symbol;Acc:7163] 4.34

Functions:

15

Synonyms: ENSG00000198598; ENSP00000353767; ENSP00000439542; ENSP00000441106;



ENSP00000441710; ENSP00000442104; ENSP00000443727; ENSP00000444603; ENSP00000445620; 4326; MMP17; NP\_057239; NM\_016155; MT4-MMP; MMP17\_HUMAN; Q9ULZ9;

More at [Entrez](#)

**MMP11** matrix metallopeptidase 11 (stromelysin 3) [Source:HGNC Symbol;Acc:7157] 4.25

Functions:

2  3  4  5  6  7  8  9       13

Synonyms: ENSG00000099953; ENSP00000215743; ENSP00000408070; ENSP00000409860; ENSP00000412107; 4320; MMP11; NP\_005931; NM\_005940; STMY3; MMP11\_HUMAN; P24347;

More at [Entrez](#)

**MMP7** matrix metallopeptidase 7 (matrilysin, uterine) [Source:HGNC Symbol;Acc:7174] 4.10

Functions:

2  3  4  5  6  7  8  9

Synonyms: ENSG00000137673; ENSP00000260227; 4316; MMP7; NP\_002414; NM\_002423; MPLS1; PUMP-1; MMP7\_HUMAN; P09237;

More at [Entrez](#)

**CTB-96E2.2** Uncharacterized protein [Source:UniProtKB/TrEMBL;Acc:H0YJW9] 4.07

Functions:

Synonyms: ENSG00000262318; ENSG00000273171; ENSP00000452347; ENSP00000460756; CTB-96E2.2;

More at [Ensembl](#)

**MMP15** matrix metallopeptidase 15 (membrane-inserted) [Source:HGNC Symbol;Acc:7161] 3.86

Functions:

2  3  4  5  6  7  8  9        15

Synonyms: ENSG00000102996; ENSP00000219271; ENSP00000457084; 4324; MMP15; NP\_002419; NM\_002428; MT2-MMP; MTMMP2; SMCP-2; MMP15\_HUMAN; P51511;

More at [Entrez](#)

**MMP26** matrix metallopeptidase 26 [Source:HGNC Symbol;Acc:14249] 3.81

Functions:

13  14

Synonyms: ENSG00000167346; ENSP00000300762; ENSP00000369753; 56547; MMP26; NP\_068573; NM\_021801; endometase; MGC126590; MGC126592; MMP26\_HUMAN; Q9NRE1;

More at [Entrez](#)

**HPX** hemopexin [Source:HGNC Symbol;Acc:5171] 3.77

Functions:

Synonyms: ENSG00000110169; ENSP00000265983; 3263; HPX; NP\_000604; NM\_000613; HEMO\_HUMAN; P02790;

More at [Entrez](#)

**MMP2** matrix metallopeptidase 2 (gelatinase A, 72kDa gelatinase, 72kDa type IV collagenase) [Source:HGNC Syn 3.69

Functions:

2  3  4  5  6  7  8  9   11

Synonyms: ENSG00000087245; ENSP00000219070; ENSP00000394237; ENSP00000444143; ENSP00000456096; ENSP00000456518; ENSP00000457949; ENSP00000461421; ENSP00000461915; 4313; MMP2; NP\_001121363; NP\_004521; NM\_001127891; NM\_004530; CLG4; CLG4A; TBE-1; MMP2\_HUMAN; P08253;

More at [Entrez](#)

## Functions

| Function                                                   | FDR      | Coverage |
|------------------------------------------------------------|----------|----------|
| 1 query genes                                              | n/a      | 9 / 9    |
| 2 collagen catabolic process                               | 7.64E-24 | 14 / 65  |
| 3 multicellular organismal catabolic process               | 1.5E-23  | 14 / 71  |
| 4 extracellular matrix disassembly                         | 1.3E-22  | 15 / 119 |
| 5 collagen metabolic process                               | 1.4E-22  | 14 / 86  |
| 6 multicellular organismal macromolecule metabolic process | 2.22E-22 | 14 / 90  |
| 7 multicellular organismal metabolic process               | 4.88E-22 | 14 / 96  |
| 8 extracellular matrix organization                        | 5.03E-17 | 15 / 290 |
| 9 extracellular structure organization                     | 5.03E-17 | 15 / 291 |
| 10 metalloendopeptidase activity                           | 1.51E-4  | 4 / 27   |
| 11 endopeptidase activity                                  | 2.57E-4  | 6 / 163  |
| 12 metallopeptidase activity                               | 1.05E-2  | 4 / 80   |
| 13 extracellular matrix                                    | 2.14E-2  | 5 / 208  |
| 14 proteinaceous extracellular matrix                      | 3.15E-2  | 4 / 110  |
| 15 enzyme activator activity                               | 3.43E-2  | 5 / 237  |

## Interactions

| Gene 1   | Gene 2 | Weight               | Network group | Networks                                                                                        |
|----------|--------|----------------------|---------------|-------------------------------------------------------------------------------------------------|
| MMP1     | MMP12  | 0.10282072611153126  | Co-expression | Arijs-Rutgeerts-2009<br>Ramaswamy-Golub-2001<br>Wang-Maris-2006                                 |
| MMP1     | MMP3   | 0.08665502583608031  | Co-expression | Arijs-Rutgeerts-2009<br>Boldrick-Relman-2002<br>Ramaswamy-Golub-2001<br>Salaverria-Siebert-2011 |
| MMP10    | MMP1   | 0.07005718909204006  | Co-expression | Arijs-Rutgeerts-2009<br>Ramaswamy-Golub-2001<br>Salaverria-Siebert-2011                         |
| MMP10    | MMP3   | 0.06580262444913387  | Co-expression | Arijs-Rutgeerts-2009<br>Salaverria-Siebert-2011                                                 |
| MMP9     | MMP12  | 0.059718070551753044 | Co-expression | Arijs-Rutgeerts-2009<br>Chen-Brown-2002<br>Wang-Maris-2006                                      |
| MMP1     | MMP9   | 0.05919322092086077  | Co-expression | Alizadeh-Staudt-2000<br>Arijs-Rutgeerts-2009<br>Chen-Brown-2002<br>Wang-Maris-2006              |
| MMP12    | MMP3   | 0.043236750178039074 | Co-expression | Arijs-Rutgeerts-2009<br>Boldrick-Relman-2002<br>Ramaswamy-Golub-2001                            |
| MMP10    | MMP8   | 0.03840585984289646  | Co-expression | Arijs-Rutgeerts-2009<br>Salaverria-Siebert-2011                                                 |
| MET      | MMP13  | 0.027094952762126923 | Co-expression | Salaverria-Siebert-2011                                                                         |
| MMP7     | MMP3   | 0.02531757391989231  | Co-expression | Alizadeh-Staudt-2000                                                                            |
| MMP7     | MMP12  | 0.02388218231499195  | Co-expression | Ramaswamy-Golub-2001                                                                            |
| MMP20    | MMP13  | 0.023868322372436523 | Co-expression | Salaverria-Siebert-2011                                                                         |
| MMP27    | MMP1   | 0.022067232057452202 | Co-expression | Chen-Brown-2002                                                                                 |
| MMP14    | MMP3   | 0.02110777236521244  | Co-expression | Alizadeh-Staudt-2000                                                                            |
| MMP8     | MMP13  | 0.021025409922003746 | Co-expression | Arijs-Rutgeerts-2009                                                                            |
| MMP8     | MMP1   | 0.020457519218325615 | Co-expression | Arijs-Rutgeerts-2009                                                                            |
| MMP2     | MMP1   | 0.020202286541461945 | Co-expression | Alizadeh-Staudt-2000<br>Salaverria-Siebert-2011                                                 |
| MMP8     | MMP20  | 0.01942802220582962  | Co-expression | Wang-Maris-2006                                                                                 |
| MMP10    | MMP12  | 0.019088277593255043 | Co-expression | Arijs-Rutgeerts-2009                                                                            |
| MMP8     | MMP9   | 0.019027601927518845 | Co-expression | Arijs-Rutgeerts-2009                                                                            |
| MMP7     | MMP14  | 0.01883828453719616  | Co-expression | Salaverria-Siebert-2011                                                                         |
| MMP8     | MMP12  | 0.017592325806617737 | Co-expression | Arijs-Rutgeerts-2009                                                                            |
| MMP10    | MMP9   | 0.016696784645318985 | Co-expression | Arijs-Rutgeerts-2009                                                                            |
| MMP20    | MMP9   | 0.01613892987370491  | Co-expression | Wang-Maris-2006                                                                                 |
| MMP10    | MMP13  | 0.015926940366625786 | Co-expression | Ramaswamy-Golub-2001                                                                            |
| MMP7     | MMP10  | 0.015549114905297756 | Co-expression | Arijs-Rutgeerts-2009                                                                            |
| MMP1     | MET    | 0.015004313550889492 | Co-expression | Salaverria-Siebert-2011                                                                         |
| MMP8     | MMP3   | 0.01430840790271759  | Co-expression | Arijs-Rutgeerts-2009                                                                            |
| MMP7     | MMP11  | 0.01417256984859705  | Co-expression | Ramaswamy-Golub-2001                                                                            |
| HSP90AA1 | MMP12  | 0.012880648486316204 | Co-expression | Alizadeh-Staudt-2000<br>Boldrick-Relman-2002                                                    |
| MAP2K1   | MET    | 0.010279510170221329 | Co-expression | Arijs-Rutgeerts-2009                                                                            |
| MMP14    | MMP19  | 0.01020832546055317  | Co-expression | Wang-Maris-2006                                                                                 |
| MMP9     | MMP3   | 0.009068215265870094 | Co-expression | Arijs-Rutgeerts-2009                                                                            |
| MMP2     | MMP15  | 0.009007873013615608 | Co-expression | Alizadeh-Staudt-2000                                                                            |
| MMP17    | MMP24  | 0.008745565079152584 | Co-expression | Salaverria-Siebert-2011                                                                         |
| MMP15    | MMP9   | 0.008615892380475998 | Co-expression | Alizadeh-Staudt-2000                                                                            |
| MMP2     | MMP19  | 0.008321760222315788 | Co-expression | Salaverria-Siebert-2011                                                                         |
| MMP2     | MMP14  | 0.00780183169990778  | Co-expression | Salaverria-Siebert-2011                                                                         |

|       |            |                       |                        |                         |
|-------|------------|-----------------------|------------------------|-------------------------|
| MMP2  | MMP7       | 0.007076840847730637  | Co-expression          | Salaverria-Siebert-2011 |
| MET   | MMP12      | 0.0065786163322627544 | Co-expression          | Alizadeh-Staudt-2000    |
| MMP2  | MMP9       | 0.006450654938817024  | Co-expression          | Alizadeh-Staudt-2000    |
| MMP2  | MMP3       | 0.005963992793112993  | Co-expression          | Salaverria-Siebert-2011 |
| MMP26 | MMP27      | 0.0031631295569241047 | Co-expression          | Arijs-Rutgeerts-2009    |
| HPX   | CTB-96E2.2 | 0.1462436467409134    | Shared protein domains | INTERPRO<br>PFAM        |
| MMP24 | MMP16      | 0.11205314472317696   | Shared protein domains | INTERPRO<br>PFAM        |
| MMP14 | MMP16      | 0.11205314472317696   | Shared protein domains | INTERPRO<br>PFAM        |
| MMP14 | MMP24      | 0.11205314472317696   | Shared protein domains | INTERPRO<br>PFAM        |
| MMP15 | MMP16      | 0.10263661295175552   | Shared protein domains | INTERPRO<br>PFAM        |
| MMP15 | MMP24      | 0.10263661295175552   | Shared protein domains | INTERPRO<br>PFAM        |
| MMP15 | MMP14      | 0.10263661295175552   | Shared protein domains | INTERPRO<br>PFAM        |
| MMP26 | MMP7       | 0.09782937541604042   | Shared protein domains | INTERPRO<br>PFAM        |
| MMP19 | MMP20      | 0.08680696785449982   | Shared protein domains | INTERPRO<br>PFAM        |
| MMP17 | MMP20      | 0.08680696785449982   | Shared protein domains | INTERPRO<br>PFAM        |
| MMP17 | MMP19      | 0.08680696785449982   | Shared protein domains | INTERPRO<br>PFAM        |
| MMP20 | MMP25      | 0.08679590746760368   | Shared protein domains | INTERPRO<br>PFAM        |
| MMP19 | MMP25      | 0.08679590746760368   | Shared protein domains | INTERPRO<br>PFAM        |
| MMP17 | MMP25      | 0.08679590746760368   | Shared protein domains | INTERPRO<br>PFAM        |
| MMP20 | MMP13      | 0.08678418025374413   | Shared protein domains | INTERPRO<br>PFAM        |
| MMP19 | MMP13      | 0.08678418025374413   | Shared protein domains | INTERPRO<br>PFAM        |
| MMP17 | MMP13      | 0.08678418025374413   | Shared protein domains | INTERPRO<br>PFAM        |
| MMP25 | MMP13      | 0.08677312359213829   | Shared protein domains | INTERPRO<br>PFAM        |
| MMP20 | MMP12      | 0.08663327991962433   | Shared protein domains | INTERPRO<br>PFAM        |
| MMP19 | MMP12      | 0.08663327991962433   | Shared protein domains | INTERPRO<br>PFAM        |
| MMP17 | MMP12      | 0.08663327991962433   | Shared protein domains | INTERPRO<br>PFAM        |
| MMP25 | MMP12      | 0.08662226796150208   | Shared protein domains | INTERPRO<br>PFAM        |
| MMP12 | MMP13      | 0.0866105854511261    | Shared protein domains | INTERPRO<br>PFAM        |
| MMP27 | MMP20      | 0.08649903163313866   | Shared protein domains | INTERPRO<br>PFAM        |
| MMP27 | MMP19      | 0.08649903163313866   | Shared protein domains | INTERPRO<br>PFAM        |
| MMP17 | MMP27      | 0.08649903163313866   | Shared protein domains | INTERPRO<br>PFAM        |
| MMP27 | MMP25      | 0.08648804947733879   | Shared protein domains | INTERPRO<br>PFAM        |
| MMP27 | MMP13      | 0.0864764079451561    | Shared protein domains | INTERPRO<br>PFAM        |
| MMP20 | MMP21      | 0.08641837537288666   | Shared protein domains | INTERPRO                |

|       |       |                     |                        | PFAM             |
|-------|-------|---------------------|------------------------|------------------|
| MMP19 | MMP21 | 0.08641837537288666 | Shared protein domains | INTERPRO<br>PFAM |
| MMP17 | MMP21 | 0.08641837537288666 | Shared protein domains | INTERPRO<br>PFAM |
| MMP25 | MMP21 | 0.08640741556882858 | Shared protein domains | INTERPRO<br>PFAM |
| MMP21 | MMP13 | 0.08639579266309738 | Shared protein domains | INTERPRO<br>PFAM |
| MMP20 | MMP3  | 0.08634748309850693 | Shared protein domains | INTERPRO<br>PFAM |
| MMP19 | MMP3  | 0.08634748309850693 | Shared protein domains | INTERPRO<br>PFAM |
| MMP17 | MMP3  | 0.08634748309850693 | Shared protein domains | INTERPRO<br>PFAM |
| MMP8  | MMP20 | 0.08633934706449509 | Shared protein domains | INTERPRO<br>PFAM |
| MMP19 | MMP8  | 0.08633934706449509 | Shared protein domains | INTERPRO<br>PFAM |
| MMP17 | MMP8  | 0.08633934706449509 | Shared protein domains | INTERPRO<br>PFAM |
| MMP25 | MMP3  | 0.08633654192090034 | Shared protein domains | INTERPRO<br>PFAM |
| MMP8  | MMP25 | 0.0863284096121788  | Shared protein domains | INTERPRO<br>PFAM |
| MMP27 | MMP12 | 0.08632660284638405 | Shared protein domains | INTERPRO<br>PFAM |
| MMP3  | MMP13 | 0.08632494136691093 | Shared protein domains | INTERPRO<br>PFAM |
| MMP8  | MMP13 | 0.08631680905818939 | Shared protein domains | INTERPRO<br>PFAM |
| MMP1  | MMP20 | 0.08628861606121063 | Shared protein domains | INTERPRO<br>PFAM |
| MMP19 | MMP1  | 0.08628861606121063 | Shared protein domains | INTERPRO<br>PFAM |
| MMP17 | MMP1  | 0.08628861606121063 | Shared protein domains | INTERPRO<br>PFAM |
| MMP1  | MMP25 | 0.08627768978476524 | Shared protein domains | INTERPRO<br>PFAM |
| MMP1  | MMP13 | 0.08626610413193703 | Shared protein domains | INTERPRO<br>PFAM |
| MMP21 | MMP12 | 0.08624627441167831 | Shared protein domains | INTERPRO<br>PFAM |
| MMP12 | MMP3  | 0.08617567270994186 | Shared protein domains | INTERPRO<br>PFAM |
| MMP8  | MMP12 | 0.08616757020354271 | Shared protein domains | INTERPRO<br>PFAM |
| MMP1  | MMP12 | 0.08611704409122467 | Shared protein domains | INTERPRO<br>PFAM |
| MMP27 | MMP21 | 0.08611324802041054 | Shared protein domains | INTERPRO<br>PFAM |
| MMP27 | MMP3  | 0.086042869836092   | Shared protein domains | INTERPRO<br>PFAM |
| MMP27 | MMP8  | 0.08603479340672493 | Shared protein domains | INTERPRO<br>PFAM |
| MMP27 | MMP1  | 0.08598442748188972 | Shared protein domains | INTERPRO<br>PFAM |
| MMP21 | MMP3  | 0.08596308156847954 | Shared protein domains | INTERPRO<br>PFAM |
| MMP8  | MMP21 | 0.08595502376556396 | Shared protein domains | INTERPRO<br>PFAM |
| MMP1  | MMP21 | 0.08590475097298622 | Shared protein domains | INTERPRO         |

|       |       |                     |                        | PFAM             |
|-------|-------|---------------------|------------------------|------------------|
| MMP8  | MMP3  | 0.08588491007685661 | Shared protein domains | INTERPRO<br>PFAM |
| MMP1  | MMP3  | 0.08583472296595573 | Shared protein domains | INTERPRO<br>PFAM |
| MMP8  | MMP1  | 0.08582668751478195 | Shared protein domains | INTERPRO<br>PFAM |
| MMP10 | MMP20 | 0.08571403473615646 | Shared protein domains | INTERPRO<br>PFAM |
| MMP19 | MMP10 | 0.08571403473615646 | Shared protein domains | INTERPRO<br>PFAM |
| MMP17 | MMP10 | 0.08571403473615646 | Shared protein domains | INTERPRO<br>PFAM |
| MMP10 | MMP25 | 0.08570325374603271 | Shared protein domains | INTERPRO<br>PFAM |
| MMP10 | MMP13 | 0.08569182828068733 | Shared protein domains | INTERPRO<br>PFAM |
| MMP10 | MMP12 | 0.08554480597376823 | Shared protein domains | INTERPRO<br>PFAM |
| MMP27 | MMP10 | 0.08541399985551834 | Shared protein domains | INTERPRO<br>PFAM |
| MMP10 | MMP21 | 0.08533541485667229 | Shared protein domains | INTERPRO<br>PFAM |
| MMP10 | MMP3  | 0.0852663442492485  | Shared protein domains | INTERPRO<br>PFAM |
| MMP10 | MMP8  | 0.08525841683149338 | Shared protein domains | INTERPRO<br>PFAM |
| MMP10 | MMP1  | 0.08520898595452309 | Shared protein domains | INTERPRO<br>PFAM |
| MMP16 | MMP20 | 0.0835627056658268  | Shared protein domains | INTERPRO<br>PFAM |
| MMP24 | MMP20 | 0.0835627056658268  | Shared protein domains | INTERPRO<br>PFAM |
| MMP19 | MMP16 | 0.0835627056658268  | Shared protein domains | INTERPRO<br>PFAM |
| MMP19 | MMP24 | 0.0835627056658268  | Shared protein domains | INTERPRO<br>PFAM |
| MMP14 | MMP20 | 0.0835627056658268  | Shared protein domains | INTERPRO<br>PFAM |
| MMP14 | MMP19 | 0.0835627056658268  | Shared protein domains | INTERPRO<br>PFAM |
| MMP17 | MMP16 | 0.0835627056658268  | Shared protein domains | INTERPRO<br>PFAM |
| MMP17 | MMP24 | 0.0835627056658268  | Shared protein domains | INTERPRO<br>PFAM |
| MMP17 | MMP14 | 0.0835627056658268  | Shared protein domains | INTERPRO<br>PFAM |
| MMP16 | MMP25 | 0.08355189487338066 | Shared protein domains | INTERPRO<br>PFAM |
| MMP24 | MMP25 | 0.08355189487338066 | Shared protein domains | INTERPRO<br>PFAM |
| MMP14 | MMP25 | 0.08355189487338066 | Shared protein domains | INTERPRO<br>PFAM |
| MMP16 | MMP13 | 0.083540428429842   | Shared protein domains | INTERPRO<br>PFAM |
| MMP24 | MMP13 | 0.083540428429842   | Shared protein domains | INTERPRO<br>PFAM |
| MMP14 | MMP13 | 0.083540428429842   | Shared protein domains | INTERPRO<br>PFAM |
| MMP16 | MMP12 | 0.0833929292857647  | Shared protein domains | INTERPRO<br>PFAM |
| MMP24 | MMP12 | 0.0833929292857647  | Shared protein domains | INTERPRO<br>PFAM |

|       |       |                     |                        |                  |
|-------|-------|---------------------|------------------------|------------------|
| MMP14 | MMP12 | 0.0833929292857647  | Shared protein domains | INTERPRO<br>PFAM |
| MMP27 | MMP16 | 0.08326169848442078 | Shared protein domains | INTERPRO<br>PFAM |
| MMP27 | MMP24 | 0.08326169848442078 | Shared protein domains | INTERPRO<br>PFAM |
| MMP27 | MMP14 | 0.08326169848442078 | Shared protein domains | INTERPRO<br>PFAM |
| MMP16 | MMP21 | 0.08318285644054413 | Shared protein domains | INTERPRO<br>PFAM |
| MMP24 | MMP21 | 0.08318285644054413 | Shared protein domains | INTERPRO<br>PFAM |
| MMP14 | MMP21 | 0.08318285644054413 | Shared protein domains | INTERPRO<br>PFAM |
| MMP16 | MMP3  | 0.08311356231570244 | Shared protein domains | INTERPRO<br>PFAM |
| MMP24 | MMP3  | 0.08311356231570244 | Shared protein domains | INTERPRO<br>PFAM |
| MMP14 | MMP3  | 0.08311356231570244 | Shared protein domains | INTERPRO<br>PFAM |
| MMP16 | MMP8  | 0.08310561254620552 | Shared protein domains | INTERPRO<br>PFAM |
| MMP24 | MMP8  | 0.08310561254620552 | Shared protein domains | INTERPRO<br>PFAM |
| MMP14 | MMP8  | 0.08310561254620552 | Shared protein domains | INTERPRO<br>PFAM |
| MMP16 | MMP1  | 0.0830560214817524  | Shared protein domains | INTERPRO<br>PFAM |
| MMP24 | MMP1  | 0.0830560214817524  | Shared protein domains | INTERPRO<br>PFAM |
| MMP14 | MMP1  | 0.0830560214817524  | Shared protein domains | INTERPRO<br>PFAM |
| MMP2  | MMP9  | 0.08281752467155457 | Shared protein domains | INTERPRO<br>PFAM |
| MMP16 | MMP10 | 0.08249437436461449 | Shared protein domains | INTERPRO<br>PFAM |
| MMP24 | MMP10 | 0.08249437436461449 | Shared protein domains | INTERPRO<br>PFAM |
| MMP14 | MMP10 | 0.08249437436461449 | Shared protein domains | INTERPRO<br>PFAM |
| MMP28 | MMP20 | 0.08162881433963776 | Shared protein domains | INTERPRO<br>PFAM |
| MMP19 | MMP28 | 0.08162881433963776 | Shared protein domains | INTERPRO<br>PFAM |
| MMP17 | MMP28 | 0.08162881433963776 | Shared protein domains | INTERPRO<br>PFAM |
| MMP28 | MMP25 | 0.08161871135234833 | Shared protein domains | INTERPRO<br>PFAM |
| MMP28 | MMP13 | 0.08160799741744995 | Shared protein domains | INTERPRO<br>PFAM |
| MMP28 | MMP12 | 0.08147017657756805 | Shared protein domains | INTERPRO<br>PFAM |
| MMP27 | MMP28 | 0.08134755864739418 | Shared protein domains | INTERPRO<br>PFAM |
| MMP28 | MMP21 | 0.0812738947570324  | Shared protein domains | INTERPRO<br>PFAM |
| MMP28 | MMP3  | 0.08120914548635483 | Shared protein domains | INTERPRO<br>PFAM |
| MMP28 | MMP8  | 0.0812017135322094  | Shared protein domains | INTERPRO<br>PFAM |
| MMP28 | MMP1  | 0.08115537837147713 | Shared protein domains | INTERPRO<br>PFAM |

|       |       |                     |                        |                  |
|-------|-------|---------------------|------------------------|------------------|
| MMP28 | MMP10 | 0.0806305892765522  | Shared protein domains | INTERPRO<br>PFAM |
| MMP28 | MMP16 | 0.07854435965418816 | Shared protein domains | INTERPRO<br>PFAM |
| MMP28 | MMP24 | 0.07854435965418816 | Shared protein domains | INTERPRO<br>PFAM |
| MMP14 | MMP28 | 0.07854435965418816 | Shared protein domains | INTERPRO<br>PFAM |
| MMP11 | MMP20 | 0.07805588468909264 | Shared protein domains | INTERPRO<br>PFAM |
| MMP11 | MMP19 | 0.07805588468909264 | Shared protein domains | INTERPRO<br>PFAM |
| MMP11 | MMP17 | 0.07805588468909264 | Shared protein domains | INTERPRO<br>PFAM |
| MMP11 | MMP25 | 0.07804539054632187 | Shared protein domains | INTERPRO<br>PFAM |
| MMP11 | MMP13 | 0.07803426682949066 | Shared protein domains | INTERPRO<br>PFAM |
| MMP11 | MMP12 | 0.07789112254977226 | Shared protein domains | INTERPRO<br>PFAM |
| MMP11 | MMP27 | 0.07776376977562904 | Shared protein domains | INTERPRO<br>PFAM |
| MMP11 | MMP21 | 0.07768725603818893 | Shared protein domains | INTERPRO<br>PFAM |
| MMP11 | MMP3  | 0.0776200033724308  | Shared protein domains | INTERPRO<br>PFAM |
| MMP11 | MMP8  | 0.07761228829622269 | Shared protein domains | INTERPRO<br>PFAM |
| MMP11 | MMP1  | 0.07756416127085686 | Shared protein domains | INTERPRO<br>PFAM |
| MMP7  | MMP20 | 0.07719079032540321 | Shared protein domains | INTERPRO<br>PFAM |
| MMP7  | MMP19 | 0.07719079032540321 | Shared protein domains | INTERPRO<br>PFAM |
| MMP7  | MMP17 | 0.07719079032540321 | Shared protein domains | INTERPRO<br>PFAM |
| MMP7  | MMP25 | 0.07718152925372124 | Shared protein domains | INTERPRO<br>PFAM |
| MMP7  | MMP13 | 0.0771716982126236  | Shared protein domains | INTERPRO<br>PFAM |
| MMP7  | MMP12 | 0.07704530656337738 | Shared protein domains | INTERPRO<br>PFAM |
| MMP11 | MMP10 | 0.077019102871418   | Shared protein domains | INTERPRO<br>PFAM |
| MMP7  | MMP27 | 0.07693285122513771 | Shared protein domains | INTERPRO<br>PFAM |
| MMP7  | MMP21 | 0.0768652856349945  | Shared protein domains | INTERPRO<br>PFAM |
| MMP7  | MMP3  | 0.07680590450763702 | Shared protein domains | INTERPRO<br>PFAM |
| MMP7  | MMP8  | 0.07679909467697144 | Shared protein domains | INTERPRO<br>PFAM |
| MMP7  | MMP1  | 0.07675659656524658 | Shared protein domains | INTERPRO<br>PFAM |
| MMP15 | MMP20 | 0.07667861878871918 | Shared protein domains | INTERPRO<br>PFAM |
| MMP15 | MMP19 | 0.07667861878871918 | Shared protein domains | INTERPRO<br>PFAM |
| MMP15 | MMP17 | 0.07667861878871918 | Shared protein domains | INTERPRO<br>PFAM |
| MMP15 | MMP25 | 0.07666851952672005 | Shared protein domains | INTERPRO<br>PFAM |



|            |       |                     |                        |                  |
|------------|-------|---------------------|------------------------|------------------|
| MMP15      | MMP13 | 0.07665780559182167 | Shared protein domains | INTERPRO<br>PFAM |
| MMP15      | MMP12 | 0.07651997357606888 | Shared protein domains | INTERPRO<br>PFAM |
| MMP15      | MMP27 | 0.07639734819531441 | Shared protein domains | INTERPRO<br>PFAM |
| MMP15      | MMP21 | 0.07632367685437202 | Shared protein domains | INTERPRO<br>PFAM |
| MMP7       | MMP10 | 0.0762753002345562  | Shared protein domains | INTERPRO<br>PFAM |
| MMP15      | MMP3  | 0.07625892385840416 | Shared protein domains | INTERPRO<br>PFAM |
| MMP15      | MMP8  | 0.07625149190425873 | Shared protein domains | INTERPRO<br>PFAM |
| MMP15      | MMP1  | 0.07620515301823616 | Shared protein domains | INTERPRO<br>PFAM |
| MMP15      | MMP10 | 0.07568032294511795 | Shared protein domains | INTERPRO<br>PFAM |
| MMP11      | MMP16 | 0.07519971951842308 | Shared protein domains | INTERPRO<br>PFAM |
| MMP11      | MMP24 | 0.07519971951842308 | Shared protein domains | INTERPRO<br>PFAM |
| MMP11      | MMP14 | 0.07519971951842308 | Shared protein domains | INTERPRO<br>PFAM |
| CTB-96E2.2 | MMP28 | 0.0751018114387989  | Shared protein domains | INTERPRO<br>PFAM |
| HPX        | MMP28 | 0.07510174438357353 | Shared protein domains | INTERPRO<br>PFAM |
| CTB-96E2.2 | MMP11 | 0.07482390105724335 | Shared protein domains | INTERPRO<br>PFAM |
| HPX        | MMP11 | 0.07482384517788887 | Shared protein domains | INTERPRO<br>PFAM |
| MMP7       | MMP16 | 0.07424148172140121 | Shared protein domains | INTERPRO<br>PFAM |
| MMP7       | MMP24 | 0.07424148172140121 | Shared protein domains | INTERPRO<br>PFAM |
| MMP7       | MMP14 | 0.07424148172140121 | Shared protein domains | INTERPRO<br>PFAM |
| MMP15      | MMP28 | 0.07203641533851624 | Shared protein domains | INTERPRO<br>PFAM |
| MMP26      | MMP11 | 0.07163614593446255 | Shared protein domains | INTERPRO<br>PFAM |
| MMP20      | MMP9  | 0.06948774307966232 | Shared protein domains | INTERPRO<br>PFAM |
| MMP19      | MMP9  | 0.06948774307966232 | Shared protein domains | INTERPRO<br>PFAM |
| MMP17      | MMP9  | 0.06948774307966232 | Shared protein domains | INTERPRO<br>PFAM |
| MMP2       | MMP20 | 0.06948769092559814 | Shared protein domains | INTERPRO<br>PFAM |
| MMP2       | MMP19 | 0.06948769092559814 | Shared protein domains | INTERPRO<br>PFAM |
| MMP2       | MMP17 | 0.06948769092559814 | Shared protein domains | INTERPRO<br>PFAM |
| MMP25      | MMP9  | 0.06947918981313705 | Shared protein domains | INTERPRO<br>PFAM |
| MMP2       | MMP25 | 0.06947914138436317 | Shared protein domains | INTERPRO<br>PFAM |
| MMP9       | MMP13 | 0.0694701261818409  | Shared protein domains | INTERPRO<br>PFAM |
| MMP2       | MMP13 | 0.06947007402777672 | Shared protein domains | INTERPRO<br>PFAM |

|       |       |                     |                        |                  |
|-------|-------|---------------------|------------------------|------------------|
| MMP9  | MMP12 | 0.06935350596904755 | Shared protein domains | INTERPRO<br>PFAM |
| MMP2  | MMP12 | 0.06935345754027367 | Shared protein domains | INTERPRO<br>PFAM |
| MMP27 | MMP9  | 0.06924974918365479 | Shared protein domains | INTERPRO<br>PFAM |
| MMP2  | MMP27 | 0.0692497007548809  | Shared protein domains | INTERPRO<br>PFAM |
| MMP21 | MMP9  | 0.06918741390109062 | Shared protein domains | INTERPRO<br>PFAM |
| MMP2  | MMP21 | 0.06918736174702644 | Shared protein domains | INTERPRO<br>PFAM |
| MMP9  | MMP3  | 0.06913262233138084 | Shared protein domains | INTERPRO<br>PFAM |
| MMP2  | MMP3  | 0.06913257390260696 | Shared protein domains | INTERPRO<br>PFAM |
| MMP8  | MMP9  | 0.06912633776664734 | Shared protein domains | INTERPRO<br>PFAM |
| MMP2  | MMP8  | 0.06912628933787346 | Shared protein domains | INTERPRO<br>PFAM |
| MMP1  | MMP9  | 0.06908712908625603 | Shared protein domains | INTERPRO<br>PFAM |
| MMP2  | MMP1  | 0.06908708065748215 | Shared protein domains | INTERPRO<br>PFAM |
| MMP15 | MMP11 | 0.06907225027680397 | Shared protein domains | INTERPRO<br>PFAM |
| MMP10 | MMP9  | 0.06864306330680847 | Shared protein domains | INTERPRO<br>PFAM |
| MMP2  | MMP10 | 0.0686430111527443  | Shared protein domains | INTERPRO<br>PFAM |
| MMP26 | MMP20 | 0.06816204264760017 | Shared protein domains | INTERPRO<br>PFAM |
| MMP26 | MMP19 | 0.06816204264760017 | Shared protein domains | INTERPRO<br>PFAM |
| MMP26 | MMP17 | 0.06816204264760017 | Shared protein domains | INTERPRO<br>PFAM |
| MMP26 | MMP25 | 0.06815265864133835 | Shared protein domains | INTERPRO<br>PFAM |
| MMP26 | MMP13 | 0.06814270839095116 | Shared protein domains | INTERPRO<br>PFAM |
| MMP15 | MMP7  | 0.06805405765771866 | Shared protein domains | INTERPRO<br>PFAM |
| MMP26 | MMP12 | 0.06801469251513481 | Shared protein domains | INTERPRO<br>PFAM |
| MMP26 | MMP27 | 0.06790079548954964 | Shared protein domains | INTERPRO<br>PFAM |
| MMP26 | MMP21 | 0.06783236563205719 | Shared protein domains | INTERPRO<br>PFAM |
| MMP26 | MMP3  | 0.06777221709489822 | Shared protein domains | INTERPRO<br>PFAM |
| MMP26 | MMP8  | 0.06776531785726547 | Shared protein domains | INTERPRO<br>PFAM |
| MMP26 | MMP1  | 0.06772227585315704 | Shared protein domains | INTERPRO<br>PFAM |
| MMP26 | MMP10 | 0.06723480299115181 | Shared protein domains | INTERPRO<br>PFAM |
| MMP28 | MMP9  | 0.06704460456967354 | Shared protein domains | INTERPRO<br>PFAM |
| MMP2  | MMP28 | 0.06704459711909294 | Shared protein domains | INTERPRO<br>PFAM |
| MMP2  | MMP7  | 0.06695974990725517 | Shared protein domains | INTERPRO<br>PFAM |
| MMP7  | MMP9  | 0.06695970147848129 | Shared protein domains | INTERPRO         |

|            |       |                      |                        | PFAM             |
|------------|-------|----------------------|------------------------|------------------|
| MMP11      | MMP28 | 0.06691209971904755  | Shared protein domains | INTERPRO<br>PFAM |
| MMP16      | MMP9  | 0.06685641780495644  | Shared protein domains | INTERPRO<br>PFAM |
| MMP24      | MMP9  | 0.06685641780495644  | Shared protein domains | INTERPRO<br>PFAM |
| MMP14      | MMP9  | 0.06685641780495644  | Shared protein domains | INTERPRO<br>PFAM |
| MMP2       | MMP16 | 0.06685636937618256  | Shared protein domains | INTERPRO<br>PFAM |
| MMP2       | MMP24 | 0.06685636937618256  | Shared protein domains | INTERPRO<br>PFAM |
| MMP2       | MMP14 | 0.06685636937618256  | Shared protein domains | INTERPRO<br>PFAM |
| MMP26      | MMP16 | 0.065691988915205    | Shared protein domains | INTERPRO<br>PFAM |
| MMP26      | MMP24 | 0.065691988915205    | Shared protein domains | INTERPRO<br>PFAM |
| MMP26      | MMP14 | 0.065691988915205    | Shared protein domains | INTERPRO<br>PFAM |
| MMP7       | MMP28 | 0.06513834558427334  | Shared protein domains | INTERPRO<br>PFAM |
| CTB-96E2.2 | MMP20 | 0.06170181185007095  | Shared protein domains | INTERPRO<br>PFAM |
| CTB-96E2.2 | MMP19 | 0.06170181185007095  | Shared protein domains | INTERPRO<br>PFAM |
| CTB-96E2.2 | MMP17 | 0.06170181185007095  | Shared protein domains | INTERPRO<br>PFAM |
| HPX        | MMP20 | 0.061701761558651924 | Shared protein domains | INTERPRO<br>PFAM |
| HPX        | MMP19 | 0.061701761558651924 | Shared protein domains | INTERPRO<br>PFAM |
| HPX        | MMP17 | 0.061701761558651924 | Shared protein domains | INTERPRO<br>PFAM |
| CTB-96E2.2 | MMP25 | 0.061694083735346794 | Shared protein domains | INTERPRO<br>PFAM |
| HPX        | MMP25 | 0.061694033443927765 | Shared protein domains | INTERPRO<br>PFAM |
| CTB-96E2.2 | MMP13 | 0.06168588809669018  | Shared protein domains | INTERPRO<br>PFAM |
| HPX        | MMP13 | 0.06168584153056145  | Shared protein domains | INTERPRO<br>PFAM |
| CTB-96E2.2 | MMP12 | 0.06158047541975975  | Shared protein domains | INTERPRO<br>PFAM |
| HPX        | MMP12 | 0.06158042699098587  | Shared protein domains | INTERPRO<br>PFAM |
| CTB-96E2.2 | MMP27 | 0.06148669123649597  | Shared protein domains | INTERPRO<br>PFAM |
| HPX        | MMP27 | 0.06148664280772209  | Shared protein domains | INTERPRO<br>PFAM |
| CTB-96E2.2 | MMP21 | 0.061430344358086586 | Shared protein domains | INTERPRO<br>PFAM |
| HPX        | MMP21 | 0.06143029406666756  | Shared protein domains | INTERPRO<br>PFAM |
| MMP2       | MMP11 | 0.06138291954994202  | Shared protein domains | INTERPRO<br>PFAM |
| MMP11      | MMP9  | 0.06138289161026478  | Shared protein domains | INTERPRO<br>PFAM |
| CTB-96E2.2 | MMP3  | 0.06138082034885883  | Shared protein domains | INTERPRO<br>PFAM |
| HPX        | MMP3  | 0.06138077192008495  | Shared protein domains | INTERPRO<br>PFAM |

|            |            |                      |                        |                  |
|------------|------------|----------------------|------------------------|------------------|
| CTB-96E2.2 | MMP8       | 0.06137513741850853  | Shared protein domains | INTERPRO<br>PFAM |
| HPX        | MMP8       | 0.06137508898973465  | Shared protein domains | INTERPRO<br>PFAM |
| CTB-96E2.2 | MMP1       | 0.06133969500660896  | Shared protein domains | INTERPRO<br>PFAM |
| HPX        | MMP1       | 0.06133964844048023  | Shared protein domains | INTERPRO<br>PFAM |
| MMP15      | MMP9       | 0.06131063774228096  | Shared protein domains | INTERPRO<br>PFAM |
| MMP2       | MMP15      | 0.06131059117615223  | Shared protein domains | INTERPRO<br>PFAM |
| CTB-96E2.2 | MMP10      | 0.06093830242753029  | Shared protein domains | INTERPRO<br>PFAM |
| HPX        | MMP10      | 0.06093825399875641  | Shared protein domains | INTERPRO<br>PFAM |
| MMP26      | MMP15      | 0.060366034507751465 | Shared protein domains | INTERPRO<br>PFAM |
| MMP2       | MMP26      | 0.05953052453696728  | Shared protein domains | INTERPRO<br>PFAM |
| MMP26      | MMP9       | 0.059530315920710564 | Shared protein domains | INTERPRO<br>PFAM |
| CTB-96E2.2 | MMP16      | 0.0593793373554945   | Shared protein domains | INTERPRO<br>PFAM |
| CTB-96E2.2 | MMP24      | 0.0593793373554945   | Shared protein domains | INTERPRO<br>PFAM |
| CTB-96E2.2 | MMP14      | 0.0593793373554945   | Shared protein domains | INTERPRO<br>PFAM |
| HPX        | MMP16      | 0.05937929078936577  | Shared protein domains | INTERPRO<br>PFAM |
| HPX        | MMP24      | 0.05937929078936577  | Shared protein domains | INTERPRO<br>PFAM |
| HPX        | MMP14      | 0.05937929078936577  | Shared protein domains | INTERPRO<br>PFAM |
| MMP7       | MMP11      | 0.05570451356470585  | Shared protein domains | INTERPRO<br>PFAM |
| MMP15      | CTB-96E2.2 | 0.05446958169341087  | Shared protein domains | INTERPRO<br>PFAM |
| HPX        | MMP15      | 0.05446953698992729  | Shared protein domains | INTERPRO<br>PFAM |
| MMP2       | CTB-96E2.2 | 0.053628357127308846 | Shared protein domains | INTERPRO<br>PFAM |
| MMP2       | HPX        | 0.053628310561180115 | Shared protein domains | INTERPRO<br>PFAM |
| CTB-96E2.2 | MMP9       | 0.05362806096673012  | Shared protein domains | INTERPRO<br>PFAM |
| HPX        | MMP9       | 0.053628016263246536 | Shared protein domains | INTERPRO<br>PFAM |
| MMP26      | MMP28      | 0.047662071883678436 | Shared protein domains | INTERPRO<br>PFAM |
| RXRA       | AR         | 0.041201964020729065 | Shared protein domains | INTERPRO<br>PFAM |

Search results generated by the GeneMANIA algorithm ([genemania.org](http://genemania.org))

# GENEMANIA

## Report of GeneMANIA search

### Network image

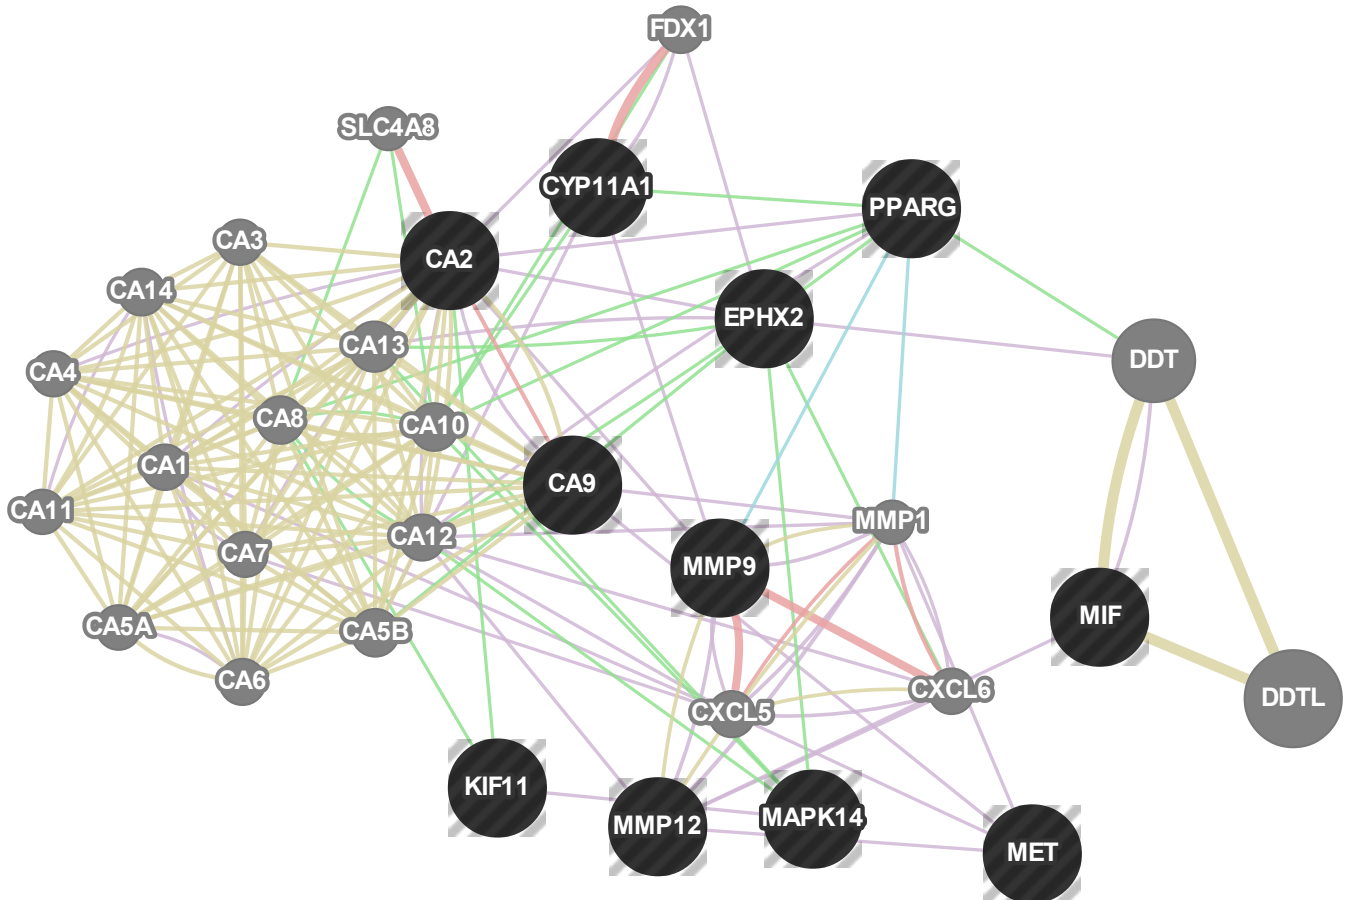

#### Functions legend

■ query genes

#### Networks legend

- Co-expression
- Genetic interactions
- Pathway
- Physical interactions
- Shared protein domains

## Search parameters

Organism: *H. sapiens* (human)

Genes: P14780; P00918; P08581; Q16790; Q16539; P34913; P37231; P52732; P05108; P14174; P39900

Networks:

### Attributes:

#### Co-expression:

Alizadeh-Staudt-2000 Arijs-Rutgeerts-2009 Bahr-Bowler-2013 Bild-Nevins-2006 B  
 Boldrick-Relman-2002 Burington-Shaughnessy-2008 Chen-Brown-2002 Cheok-Evans-2003  
 Gysin-McMahon-2012 Innocenti-Brown-2011 Kang-Willman-2010 Mallon-McKay-2013  
 Perou-Botstein-1999 Ramaswamy-Golub-2001 Rieger-Chu-2004 Roth-Zlotnik-2006  
 Salaverria-Siebert-2011 Smirnov-Cheung-2009 Wang-Maris-2006 Wu-Garvey-2007

#### Co-localization:

Johnson-Shoemaker-2003 Satoh-Yamamoto-2013 Schadt-Shoemaker-2004

#### Genetic interactions:

BIOGRID-SMALL-SCALE-STUDIES IREF-SMALL-SCALE-STUDIES Lin-Boeke-2012 A Lin-Boeke-2012 B  
 Lin-Smith-2010 Toyoshima-Grandori-2012 Willingham-Muchowski-2003

#### Pathway:

PATHWAYCOMMONS-CELL\_MAP PATHWAYCOMMONS-HUMANCYC PATHWAYCOMMONS-IMID  
 PATHWAYCOMMONS-NCI\_NATURE PATHWAYCOMMONS-REACTOME Wu-Stein-2010

#### Physical interactions:

Abu-Odeh-Aqeilan-2014 Agrawal-Sedivy-2010 Aichele-Groettrup-2012 Albers-Koegl-2005  
 Alexandru-Deshais-2008 Altun-Kessler-2011 Andresen-Flores-Morales-2014 Arbuckle-Grant-2010  
 Arora-Mercola-2008 BIOGRID-SMALL-SCALE-STUDIES Bandyopadhyay-Ideker-2010  
 Bantscheff-Drewes-2011 Barr-Knapp-2009 Barrios-Rodiles-Wrana-2005 Behrends-Harper-2010  
 Behzadnia-Lührmann-2007 Bennett-Harper-2010 Benzinger-Hermeking-2005 Berggård-James-2006  
 Bett-Hay-2013 Blandin-Richard-2013 Bouwmeester-Superti-Furga-2004 Brajenovic-Drewes-2004  
 Brehme-Superti-Furga-2009 Bruderer-Hay-2011 Byron-Humphries-2012 Cai-Conaway-2007  
 Camargo-Brandon-2007 Cannavo-Jiricny-2007 Cao-Chinnaiyan-2014 Chen-Ge-2013 Chen-Naus-2012  
 Chen-Zhang-2013 Cheng-Chen-2010 Cloutier-Coulombe-2013 Colland-Gauthier-2004  
 Couzens-Gingras-2013 Cox-Rizzino-2013 Danielsen-Nielsen-2011 Dyer-Sobral-2010  
 Emanuele-Elledge-2011 Ewing-Figeys-2007 Fenner-Prehn-2010 Foerster-Ritter-2013  
 Foster-Marshall-2013 Freibaum-Taylor-2010 Gao-Reinberg-2012 Gautier-Hall-2009 Giannone-Liu-2010  
 Glatter-Gstaiger-2009 Gloeckner-Ueffing-2007 Goehler-Wanker-2004 Golebiowski-Hay-2009  
 Goudreault-Gingras-2009 Grant-2010 Greco-Cristea-2011 Havrylov-Redowicz-2009  
 Havugimana-Emili-2012 Hayes-Urbé-2012 Hegele-Stelzl-2012 A Hegele-Stelzl-2012 B  
 Humphries-Humphries-2009 Hutchins-Peters-2010 IREF-BIND IREF-BIOGRID IREF-DIP IREF-HPRD  
 IREF-INNATEDB IREF-INTACT IREF-MATRIXDB IREF-MPPI IREF-OPHID IREF-PUBMED  
 IREF-SMALL-SCALE-STUDIES Ingham-Pawson-2005 Jeronimo-Coulombe-2007 Jin-Pawson-2004  
 Jones-MacBeath-2006 Joshi-Cristea-2013 Jäger-Krogan-2012 Kahle-Zoghbi-2011 Kim-Gygi-2011  
 Kneissl-Grummt-2003 Koch-Hermeking-2007 Kristensen-Foster-2012 Lau-Ronai-2012  
 Lee-Doedens-2011 Lee-Songyang-2011 Lehner-Sanderson-2004 A Lehner-Sanderson-2004 B  
 Leng-Wang-2014 Li-Dorf-2011 A Li-Dorf-2011 B Lim-Zoghbi-2006 Liu-Wang-2012  
 Loch-Strickler-2012 Lopitz-Otsoa-Rodriguez-2012 Lu-Zhang-2013 Mak-Moffat-2010  
 Malovannaya-Qin-2010 Markson-Sanderson-2009 Maréchal-Zou-2014 Matafora-Bachi-2009  
 Matsumoto-Nakayama-2005 McCracken-Blencowe-2005 McFarland-Nussbaum-2008  
 Meek-Piwonica-Worms-2004 Meierhofer-Kaiser-2008 Miyamoto-Sato-Yanagawa-2010  
 Nakayama-Ohara-2002 Nakayasu-Adkins-2013 Napolitano-Meroni-2011 Nathan-Goldberg-2013  
 Neganova-Lako-2011 Newman-Keating-2003 Olma-Pintard-2009 Oláh-Ovádi-2011  
 Oshikawa-Nakayama-2012 Ouyang-Gill-2009 Panigrahi-Pati-2012 Perez-Hernandez-Yáñez-Mó-2013  
 Persaud-Rotin-2009 Pichlmair-Superti-Furga-2011 Pichlmair-Superti-Furga-2012 Pilot-Storck-Goillot-2010  
 Povlsen-Choudhary-2012 Ramachandran-LaBaer-2004 Ravasi-Hayashizaki-2010 Reinke-Keating-2013  
 Richter-Chrzanowska-Lightowlers-2010 Roux-Burke-2012 Rowbotham-Mermoud-2011 Roy-Parent-2013  
 Rual-Vidal-2005 A Rual-Vidal-2005 B San-Marina-Minden-2008 Sang-Jackson-2011  
 Sato-Conaway-2004 Shi-Qin-2011 Singh-Moore-2012 Soler-López-Aloy-2011 Sowa-Harper-2009  
 Stehling-Lill-2012 Stelzl-Wanker-2005 Suter-Wanker-2013 Taipale-Lindquist-2012  
 Takahashi-Conaway-2011 Tarallo-Weisz-2011 Tatham-Hay-2011 Teixeira-Gomes-2010  
 Thalappilly-Duseti-2008 Tsai-Cristea-2012 Udeshi-Carr-2012 Vandamme-Angrand-2011  
 Vanderwerf-Bagby-2009 Varjosalo-Gstaiger-2013 A Varjosalo-Gstaiger-2013 B  
 Varjosalo-Superti-Furga-2013 Venkatesan-Vidal-2009 Vinayagam-Wanker-2011 Wagner-Choudhary-2011  
 Wallach-Kramer-2013 Wang-Balch-2006 Wang-He-2008 Wang-Yang-2011 Weimann-Stelzl-2013 A  
 Weimann-Stelzl-2013 B Weinmann-Meister-2009 Wilker-Yaffe-2007 Wong-O'Bryan-2012  
 Woods-Monteiro-2012 Woodsmith-Sanderson-2012 Wu-Li-2007 Wu-Ma-2012 Xiao-Lefkowitz-2007

Xie-Cong-2013 Xu-Jaffrey-2010 Xu-Ye-2012 Yang-Chen-2010 Yatim-Benkirane-2012 Yu-Chow-2013  
 Yu-Vidal-2011 Zanon-Pichler-2013 Zhang-Zou-2011 Zhao-Krug-2005 Zhao-Yang-2011  
 Zhou-Conrads-2004 Zhou-Liang-2012 de Hoog-Mann-2004 van Wijk-Timmers-2009

**Predicted:**

I2D-BIND-Fly2Human I2D-BIND-Mouse2Human I2D-BIND-Rat2Human I2D-BIND-Worm2Human  
 I2D-BIND-Yeast2Human I2D-BioGRID-Fly2Human I2D-BioGRID-Mouse2Human I2D-BioGRID-Rat2Human  
 I2D-BioGRID-Worm2Human I2D-BioGRID-Yeast2Human  
 I2D-Chen-Pawson-2009-PiwiScreen-Mouse2Human I2D-Formstecher-Daviet-2005-Embryo-Fly2Human  
 I2D-Giot-Rothbert-2003-Low-Fly2Human I2D-INNATEDB-Mouse2Human I2D-IntAct-Fly2Human  
 I2D-IntAct-Mouse2Human I2D-IntAct-Rat2Human I2D-IntAct-Worm2Human I2D-IntAct-Yeast2Human  
 I2D-Krogan-Greenblatt-2006-Core-Yeast2Human I2D-Krogan-Greenblatt-2006-NonCore-Yeast2Human  
 I2D-Li-Vidal-2004-CORE-1-Worm2Human I2D-Li-Vidal-2004-non-core-Worm2Human  
 I2D-MGI-Mouse2Human I2D-MINT-Fly2Human I2D-MINT-Mouse2Human I2D-MINT-Rat2Human  
 I2D-MINT-Worm2Human I2D-MINT-Yeast2Human I2D-Manual-Mouse2Human I2D-Manual-Rat2Human  
 I2D-Ptacek-Snyder-2005-Yeast2Human I2D-Tarassov-PCA-Yeast2Human  
 I2D-Tewari-Vidal-2004-TGFb-Worm2Human I2D-Wang-Orkin-2006-EScmplx-Mouse2Human  
 I2D-Wang-Orkin-2006-EScmplxlow-Mouse2Human I2D-Yu-Vidal-2008-GoldStd-Yeast2Human  
 I2D-vonMering-Bork-2002-High-Yeast2Human I2D-vonMering-Bork-2002-Low-Yeast2Human  
 I2D-vonMering-Bork-2002-Medium-Yeast2Human Stuart-Kim-2003

**Shared protein domains:**

INTERPRO PFAM

Network weighting: Automatically selected weighting method (Assigned based on query genes)

Number of gene results: 20

## Networks

---

|                                                                                                                                                                                                                           |                |
|---------------------------------------------------------------------------------------------------------------------------------------------------------------------------------------------------------------------------|----------------|
| <b>Co-expression</b>                                                                                                                                                                                                      | <b>65.86 %</b> |
| <b>Mallon-McKay-2013</b>                                                                                                                                                                                                  | <b>10.43 %</b> |
| <a href="#">StemCellDB: the human pluripotent stem cell database at the National Institutes of Health.</a> Mallon et al. (2013). <i>Stem Cell Res.</i>                                                                    |                |
| Source: <a href="#">Pearson correlation</a> with 567,140 interactions from <a href="#">GEO</a>                                                                                                                            |                |
| Tags: cultured cells; stem cells; cell line                                                                                                                                                                               |                |
| <b>Chen-Brown-2002</b>                                                                                                                                                                                                    | <b>10.03 %</b> |
| <a href="#">Gene expression patterns in human liver cancers.</a> Chen et al. (2002). <i>Mol Biol Cell.</i>                                                                                                                |                |
| Source: <a href="#">Pearson correlation</a> with 275,649 interactions from supplementary material                                                                                                                         |                |
| Tags: cell proliferation; transcription factors; liver; cancer                                                                                                                                                            |                |
| <b>Wang-Maris-2006</b>                                                                                                                                                                                                    | <b>9.70 %</b>  |
| <a href="#">Integrative genomics identifies distinct molecular classes of neuroblastoma and shows that multiple genes are targeted by regional alterations in DNA copy number.</a> Wang et al. (2006). <i>Cancer Res.</i> |                |
| Source: <a href="#">Pearson correlation</a> with 264,234 interactions from <a href="#">GEO</a>                                                                                                                            |                |
| Tags: transcription factors; cancer                                                                                                                                                                                       |                |
| <b>Bild-Nevins-2006 B</b>                                                                                                                                                                                                 | <b>7.47 %</b>  |
| <a href="#">Oncogenic pathway signatures in human cancers as a guide to targeted therapies.</a> Bild et al. (2006). <i>Nature.</i>                                                                                        |                |
| Note: One of 3 datasets produced from this publication.                                                                                                                                                                   |                |
| Source: <a href="#">Pearson correlation</a> with 282,582 interactions from <a href="#">GEO</a>                                                                                                                            |                |
| Tags: cultured cells; signal transduction; cancer; epithelial cells; cell line; disease; breast; transcription factors; breast cancer                                                                                     |                |
| <b>Salaverria-Siebert-2011</b>                                                                                                                                                                                            | <b>6.55 %</b>  |
| <a href="#">Translocations activating IRF4 identify a subtype of germinal center-derived B-cell lymphoma affecting predominantly children and young adults.</a> Salaverria et al. (2011). <i>Blood.</i>                   |                |
| Source: <a href="#">Pearson correlation</a> with 514,070 interactions from <a href="#">GEO</a>                                                                                                                            |                |
| Tags: transcription factors; cancer                                                                                                                                                                                       |                |
| <b>Ramaswamy-Golub-2001</b>                                                                                                                                                                                               | <b>6.24 %</b>  |
| <a href="#">Multiclass cancer diagnosis using tumor gene expression signatures.</a> Ramaswamy et al. (2001). <i>Proc Natl Acad Sci U S A.</i>                                                                             |                |
| Source: <a href="#">Pearson correlation</a> with 270,142 interactions from supplementary material                                                                                                                         |                |
| Tags: cancer                                                                                                                                                                                                              |                |
| <b>Arijs-Rutgeerts-2009</b>                                                                                                                                                                                               | <b>4.45 %</b>  |
| <a href="#">Mucosal gene expression of antimicrobial peptides in inflammatory bowel disease before and after first infliximab treatment.</a> Arijs et al. (2009). <i>PLoS One.</i>                                        |                |
| Source: <a href="#">Pearson correlation</a> with 653,194 interactions from <a href="#">GEO</a>                                                                                                                            |                |
| Tags: immune system                                                                                                                                                                                                       |                |
| <b>Alizadeh-Staudt-2000</b>                                                                                                                                                                                               | <b>4.04 %</b>  |
| <a href="#">Distinct types of diffuse large B-cell lymphoma identified by gene expression profiling.</a> Alizadeh et al. (2000). <i>Nature.</i>                                                                           |                |
| Source: <a href="#">Pearson correlation</a> with 88,888 interactions from supplementary material                                                                                                                          |                |
| Tags: cultured cells; cancer                                                                                                                                                                                              |                |
| <b>Rieger-Chu-2004</b>                                                                                                                                                                                                    | <b>3.04 %</b>  |
| <a href="#">Toxicity from radiation therapy associated with abnormal transcriptional responses to DNA damage.</a> Rieger et al. (2004). <i>Proc Natl Acad Sci U S A.</i>                                                  |                |



Source: [Pearson correlation](#) with 259,055 interactions from [GEO](#)

Tags: cultured cells; cell line

**Roth-Zlotnik-2006** **2.47 %**

[Gene expression analyses reveal molecular relationships among 20 regions of the human CNS.](#) Roth et al. (2006). *Neurogenetics*.

Source: [Pearson correlation](#) with 666,614 interactions from [GEO](#)

**Boldrick-Relman-2002** **1.45 %**

[Stereotyped and specific gene expression programs in human innate immune responses to bacteria.](#) Boldrick et al. (2002). *Proc Natl Acad Sci U S A*.

Source: [Pearson correlation](#) with 108,543 interactions from supplementary material

Tags: immune system

**Shared protein domains** **24.06 %**

**INTERPRO** **12.35 %**

Source: [Pearson correlation](#) with 562,560 interactions from [InterPro](#)

**PFAM** **11.71 %**

Source: [Pearson correlation](#) with 543,464 interactions from [Pfam](#)

**Physical interactions** **7.64 %**

**IREF-BIOGRID** **6.91 %**

Source: [Direct interaction](#) with 127,207 interactions from [iRefIndex](#)

**IREF-SMALL-SCALE-STUDIES** **0.73 %**

Source: [Direct interaction](#) with 69,119 interactions from [iRefIndex](#)

**Pathway** **2.11 %**

**Wu-Stein-2010** **2.11 %**

[A human functional protein interaction network and its application to cancer data analysis.](#) Wu et al. (2010). *Genome Biol*.

Source: 78,183 interactions from supplementary material

Tags: transcription factors; cancer

**Genetic interactions** **0.33 %**

**Lin-Smith-2010** **0.33 %**

[A genome-wide map of human genetic interactions inferred from radiation hybrid genotypes.](#) Lin et al. (2010). *Genome Res*.

Source: 4,836,794 interactions from supplementary material

---

## Attributes

---

| <u>Attribute</u> | <u>Gene</u> |
|------------------|-------------|
|------------------|-------------|

## Genes

**MET (P08581)** met proto-oncogene [Source:HGNC Symbol;Acc:7029]

Functions:

Synonyms: ENSG00000105976; ENSP00000317272; ENSP00000380860; ENSP00000398140; ENSP00000398776; ENSP00000410980; ENSP00000413857; ENSP00000445020; 4233; MET; NP\_000236; NP\_001120972; NM\_000245; NM\_001127500; HGFR; RCCP2; MET\_HUMAN; P08581;

More at [Entrez](#)

**CYP11A1 (P05108)** cytochrome P450, family 11, subfamily A, polypeptide 1 [Source:HGNC Symbol;Acc:2590]

Functions:

Synonyms: ENSG00000140459; ENSP00000268053; ENSP00000351455; ENSP00000388018; ENSP00000391081; ENSP00000402064; ENSP00000405488; ENSP00000439750; ENSP00000456598; ENSP00000456941; 1583; CYP11A1; NP\_000772; NP\_001093243; NM\_000781; NM\_001099773; CYP11A; P450SCC; CP11A\_HUMAN; P05108;

More at [Entrez](#)

**MMP12 (P39900)** matrix metalloproteinase 12 (macrophage elastase) [Source:HGNC Symbol;Acc:7158]

Functions:

Synonyms: ENSG00000262406; ENSP00000458585; 4321; MMP12; NP\_002417; NM\_002426; HME; MMP12\_HUMAN; P39900;

More at [Entrez](#)

**CA2 (P00918)** carbonic anhydrase II [Source:HGNC Symbol;Acc:1373]

Functions:

Synonyms: ENSG00000104267; ENSP00000285379; ENSP00000428443; ENSP00000428947; 760; CA2; NP\_000058; NM\_000067; CA-II; CAII; Car2; CAH2\_HUMAN; P00918;

More at [Entrez](#)

**CA9 (Q16790)** carbonic anhydrase IX [Source:HGNC Symbol;Acc:1383]

Functions:

Synonyms: ENSG00000107159; ENSP00000367608; 768; CA9; NP\_001207; NM\_001216; CAIX; CAH9\_HUMAN; Q16790;

More at [Entrez](#)

**EPHX2 (P34913)** epoxide hydrolase 2, cytoplasmic [Source:HGNC Symbol;Acc:3402]

Functions:

Synonyms: ENSG00000120915; ENSP00000369843; ENSP00000427956; ENSP00000428191; ENSP00000428875; ENSP00000430269; ENSP00000430302; ENSP00000430779; 2053; EPHX2; NP\_001243411; NP\_001243412; NP\_001243413; NP\_001970; NM\_001256482; NM\_001256483; NM\_001256484; NM\_001979; HYES\_HUMAN; P34913;

More at [Entrez](#)

**MIF (P14174)** macrophage migration inhibitory factor (glycosylation-inhibiting factor) [Source:HGNC Symbol;Acc:7097]

Functions:

Synonyms: ENSG00000240972; ENSP00000215754; 4282; MIF; NP\_002406; NM\_002415; GLIF; MIF\_HUMAN; P14174;

More at [Entrez](#)

**PPARG (P37231)** peroxisome proliferator-activated receptor gamma [Source:HGNC Symbol;Acc:9236]

Functions:

Synonyms: ENSG00000132170; ENSP00000287820; ENSP00000312472; ENSP00000380195; ENSP00000380196; ENSP00000380205; ENSP00000380207; ENSP00000380210; ENSP00000380218; ENSP00000380221; ENSP00000380224; ENSP00000392285; ENSP00000411931; ENSP00000438940; 5468; PPARG; NP\_005028; NP\_056953; NP\_619725; NP\_619726; NM\_005037; NM\_015869; NM\_138711; NM\_138712; NR1C3; PPARG1; PPARG2; PPARgamma; P37231; PPARG\_HUMAN;

More at [Entrez](#)

**KIF11 (P52732)** kinesin family member 11 [Source:HGNC Symbol;Acc:6388]

Functions:

Synonyms: ENSG00000138160; ENSP00000260731; 3832; KIF11; NP\_004514; NM\_004523; Eg5; HKSP; KNSL1; TRIP5; KIF11\_HUMAN; P52732;

More at [Entrez](#)

**MAPK14 (Q16539)** mitogen-activated protein kinase 14 [Source:HGNC Symbol;Acc:6876]

Functions:

Synonyms: ENSG00000112062; ENSP00000229794; ENSP00000229795; ENSP00000308669; ENSP00000417065; ENSP00000417531; ENSP00000419141; ENSP00000419837; 1432; MAPK14; NP\_001306; NP\_620581; NP\_620582; NP\_620583; NM\_001315; NM\_139012; NM\_139014; CSBP1; CSBP2; CSPB1; Mxi2; PRKM14; PRKM15; MK14\_HUMAN; Q16539;

More at [Entrez](#)

**MMP9 (P14780)** matrix metalloproteinase 9 (gelatinase B, 92kDa gelatinase, 92kDa type IV collagenase) [Source:HGNC Symbol;Acc:100985]

Functions:

Synonyms: ENSG00000100985; ENSP00000361405; 4318; MMP9; NP\_004985; NM\_004994; CLG4B; MMP9\_HUMAN; P14780;

More at [Entrez](#)

**DDTL** D-dopachrome tautomerase-like [Source:HGNC Symbol;Acc:33446]

5.25

Functions:

Synonyms: ENSG00000099974; ENSP00000215770; 100037417; DDTL; NP\_001077862; NM\_001084393; A6NHG4; DDTL\_HUMAN;

More at [Entrez](#)

**DDT** D-dopachrome tautomerase [Source:HGNC Symbol;Acc:2732]

4.13

Functions:

Synonyms: ENSG00000099977; ENSP00000215773; ENSP00000381386; ENSP00000384866; ENSP00000385714; ENSP00000399768; ENSP00000409440; 1652; DDT; NP\_001077861; NP\_001346; NM\_001084392; NM\_001355; DDCT; DOPD\_HUMAN; P30046;

More at [Entrez](#)

**CA13** carbonic anhydrase XIII [Source:HGNC Symbol;Acc:14914]

1.61

Functions:

Synonyms: ENSG00000185015; ENSP00000318912; 100507258; 377677; CA13; NP\_940986; NM\_198584; CAXIII; FLJ37995; MGC59868; CAH13\_HUMAN; Q8N1Q1;

More at [Entrez](#)

**CA5B** carbonic anhydrase VB, mitochondrial [Source:HGNC Symbol;Acc:1378] 1.41

Functions:

2  3

Synonyms: ENSG00000169239; ENSP00000314099; ENSP00000417021; ENSP00000417236; ENSP00000417553; ENSP00000418622; 11238; CA5B; NP\_009151; NM\_007220; CAH5B\_HUMAN; Q9Y2D0;

More at [Entrez](#)

**CA10** carbonic anhydrase X [Source:HGNC Symbol;Acc:1369] 1.40

Functions:

Synonyms: ENSG00000154975; ENSP00000285273; ENSP00000340363; ENSP00000390666; ENSP00000405388; ENSP00000458145; ENSP00000459619; ENSP00000460238; ENSP00000461908; 56934; CA10; NP\_001076002; NP\_001076003; NP\_064563; NM\_001082533; NM\_001082534; NM\_020178; CA-RPX; CARPX; HU CEP-15; CAH10\_HUMAN; Q9NS85;

More at [Entrez](#)

**CA8** carbonic anhydrase VIII [Source:HGNC Symbol;Acc:1382] 1.38

Functions:

Synonyms: ENSG00000178538; ENSP00000314407; 767; CA8; NP\_004047; NM\_004056; CALS; CAH8\_HUMAN; P35219;

More at [Entrez](#)

**CA14** carbonic anhydrase XIV [Source:HGNC Symbol;Acc:1372] 1.33

Functions:

2  3

Synonyms: ENSG00000118298; ENSG00000264654; ENSP00000358107; ENSP00000462389; ENSP00000475238; ENSP00000475869; 23632; CA14; NP\_036245; NM\_012113; CAH14\_HUMAN; Q9ULX7;

More at [Entrez](#)

**FDX1** ferredoxin 1 [Source:HGNC Symbol;Acc:3638] 1.31

Functions:

8  10

Synonyms: ENSG00000137714; ENSP00000260270; 2230; FDX1; NP\_004100; NM\_004109; ADX; FDX; ADX\_HUMAN; P10109;

More at [Entrez](#)

**CXCL5** chemokine (C-X-C motif) ligand 5 [Source:HGNC Symbol;Acc:10642] 1.28

Functions:

Synonyms: ENSG00000163735; ENSP00000296027; 6374; CXCL5; NP\_002985; NM\_002994; ENA-78; SCYB5; CXCL5\_HUMAN; P42830;

More at [Entrez](#)

**CA6** carbonic anhydrase VI [Source:HGNC Symbol;Acc:1380] 1.28

Functions:

2  3          11

Synonyms: ENSG00000131686; ENSP00000366654; ENSP00000366661; ENSP00000366662; ENSP00000435280; ENSP00000447108; 765; CA6; NP\_001206; NP\_001257429; NP\_001257430; NP\_001257431; NM\_001215; NM\_001270500; NM\_001270501; CAH6\_HUMAN; P23280;

More at [Entrez](#)

**CA12** carbonic anhydrase XII [Source:HGNC Symbol;Acc:1371] 1.28

Functions:

2  3

Synonyms: ENSG0000074410; ENSP00000178638; ENSP00000343088; ENSP00000403028; 771; CA12; NP\_001209; NP\_996808; NM\_001218; NM\_206925; HsT18816; CAH12\_HUMAN; O43570;

More at [Entrez](#)

CXCL6 chemokine (C-X-C motif) ligand 6 [Source:HGNC Symbol;Acc:10643] 1.23

Functions:

Synonyms: ENSG00000124875; ENSP00000226317; ENSP00000424819; 6372; CXCL6; NP\_002984; NM\_002993; CKA-3; GCP-2; SCYB6; CXCL6\_HUMAN; P80162;

More at [Entrez](#)

CA1 carbonic anhydrase I [Source:HGNC Symbol;Acc:1368] 1.22

Functions:

2  3

Synonyms: ENSG00000133742; ENSP00000256119; ENSP00000392338; ENSP00000401551; ENSP00000427773; ENSP00000427852; ENSP00000428923; ENSP00000429300; ENSP00000429688; ENSP00000429798; ENSP00000429843; ENSP00000430372; ENSP00000430471; ENSP00000430543; ENSP00000430571; ENSP00000430656; ENSP00000430710; ENSP00000430737; ENSP00000430861; ENSP00000430975; ENSP00000443517; 759; CA1; NP\_001122301; NP\_001122302; NP\_001122303; NP\_001158302; NP\_001729; NM\_001128829; NM\_001128830; NM\_001128831; NM\_001164830; NM\_001738; CAH1\_HUMAN; P00915;

More at [Entrez](#)

CA4 carbonic anhydrase IV [Source:HGNC Symbol;Acc:1375] 1.22

Functions:

2  3           11

Synonyms: ENSG00000167434; ENSP00000300900; ENSP00000464757; ENSP00000465837; ENSP00000466964; ENSP00000467465; 762; CA4; NP\_000708; NM\_000717; CAIV; Car4; RP17; CAH4\_HUMAN; P22748;

More at [Entrez](#)

CA3 carbonic anhydrase III, muscle specific [Source:HGNC Symbol;Acc:1374] 1.21

Functions:

2  3

Synonyms: ENSG00000164879; ENSP00000285381; ENSP00000429760; 761; CA3; NP\_005172; NM\_005181; CAIII; Car3; CAH3\_HUMAN; P07451;

More at [Entrez](#)

CA7 carbonic anhydrase VII [Source:HGNC Symbol;Acc:1381] 1.20

Functions:

2  3

Synonyms: ENSG00000168748; ENSP00000345659; ENSP00000377632; ENSP00000447178; 766; CA7; NP\_001014435; NP\_005173; NM\_001014435; NM\_005182; CAH7\_HUMAN; P43166;

More at [Entrez](#)

CA5A carbonic anhydrase VA, mitochondrial [Source:HGNC Symbol;Acc:1377] 1.16

Functions:

2  3

Synonyms: ENSG00000174990; ENSP00000309649; 763; CA5A; NP\_001730; NM\_001739; CA5; CAVA; CAH5A\_HUMAN; P35218;

More at [Entrez](#)

CA11 carbonic anhydrase XI [Source:HGNC Symbol;Acc:1370] 1.14

Functions:

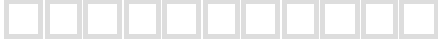

Synonyms: ENSG00000063180; ENSP00000084798; ENSP00000469234; 770; CA11; NP\_001208; NM\_001217; CARP2; CARPX1; CAH11\_HUMAN; O75493;

More at [Entrez](#)

---

**MMP1** matrix metalloproteinase 1 (interstitial collagenase) [Source:HGNC Symbol;Acc:7155]

1.07

Functions:

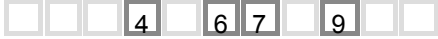

Synonyms: ENSG00000196611; ENSP00000322788; 4312; MMP1; NP\_001139410; NP\_002412; NM\_001145938; NM\_002421; MMP1\_HUMAN; P03956;

More at [Entrez](#)

---

**SLC4A8** solute carrier family 4, sodium bicarbonate cotransporter, member 8 [Source:HGNC Symbol;Acc:11034]

1.05

Functions:

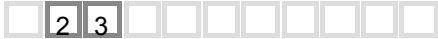

Synonyms: ENSG00000050438; ENSP00000351483; ENSP00000378325; ENSP00000405812; ENSP00000441520; ENSP00000442561; 9498; SLC4A8; NP\_001035049; NP\_001245330; NP\_001245331; NP\_001245332; NP\_001254544; NM\_001039960; NM\_001258401; NM\_001258402; NM\_001258403; NM\_001267615; Q2Y0W8; S4A8\_HUMAN;

More at [Entrez](#)

## Functions

| Function                                                        | FDR      | Coverage |
|-----------------------------------------------------------------|----------|----------|
| 1 query genes                                                   | n/a      | 11 / 11  |
| 2 bicarbonate transport                                         | 3.19E-26 | 13 / 29  |
| 3 organic anion transport                                       | 6.75E-15 | 14 / 254 |
| 4 metalloendopeptidase activity                                 | 6.86E-2  | 3 / 27   |
| 5 intramolecular oxidoreductase activity, transposing C=C bonds | 5.37E-1  | 2 / 10   |
| 6 multicellular organismal catabolic process                    | 5.48E-1  | 3 / 71   |
| 7 collagen catabolic process                                    | 5.48E-1  | 3 / 65   |
| 8 cholesterol metabolic process                                 | 5.48E-1  | 3 / 69   |
| 9 metallopeptidase activity                                     | 6.07E-1  | 3 / 80   |
| 10 sterol metabolic process                                     | 6.07E-1  | 3 / 80   |
| 11 hydro-lyase activity                                         | 6.14E-1  | 2 / 17   |



## Interactions

| Gene 1 | Gene 2  | Weight                | Network group | Networks                                                                           |
|--------|---------|-----------------------|---------------|------------------------------------------------------------------------------------|
| MMP1   | MMP12   | 0.10282072611153126   | Co-expression | Arijs-Rutgeerts-2009<br>Ramaswamy-Golub-2001<br>Wang-Maris-2006                    |
| MMP1   | CXCL5   | 0.06496808491647243   | Co-expression | Arijs-Rutgeerts-2009<br>Roth-Zlotnik-2006<br>Salaverria-Siebert-2011               |
| MMP9   | MMP12   | 0.059718070551753044  | Co-expression | Arijs-Rutgeerts-2009<br>Chen-Brown-2002<br>Wang-Maris-2006                         |
| MMP1   | MMP9    | 0.05919322092086077   | Co-expression | Alizadeh-Staudt-2000<br>Arijs-Rutgeerts-2009<br>Chen-Brown-2002<br>Wang-Maris-2006 |
| CXCL6  | CXCL5   | 0.05336379539221525   | Co-expression | Arijs-Rutgeerts-2009<br>Salaverria-Siebert-2011<br>Wang-Maris-2006                 |
| DDT    | MIF     | 0.051807248033583164  | Co-expression | Bild-Nevins-2006 B<br>Salaverria-Siebert-2011<br>Wang-Maris-2006                   |
| CA6    | CA14    | 0.024239005520939827  | Co-expression | Ramaswamy-Golub-2001                                                               |
| MMP9   | CA2     | 0.02351631224155426   | Co-expression | Bild-Nevins-2006 B                                                                 |
| CA9    | CA2     | 0.021494185552001     | Co-expression | Salaverria-Siebert-2011                                                            |
| MMP1   | CA12    | 0.020530197769403458  | Co-expression | Salaverria-Siebert-2011                                                            |
| CA12   | MMP12   | 0.020372465252876282  | Co-expression | Chen-Brown-2002                                                                    |
| FDX1   | CYP11A1 | 0.01983389165252447   | Co-expression | Mallon-McKay-2013<br>Roth-Zlotnik-2006                                             |
| MAPK14 | KIF11   | 0.01903084572404623   | Co-expression | Chen-Brown-2002<br>Roth-Zlotnik-2006                                               |
| CXCL5  | MMP9    | 0.01895942911505699   | Co-expression | Boldrick-Relman-2002                                                               |
| CA9    | MET     | 0.01891346648335457   | Co-expression | Ramaswamy-Golub-2001                                                               |
| CA13   | EPHX2   | 0.01882065087556839   | Co-expression | Mallon-McKay-2013                                                                  |
| EPHX2  | CA2     | 0.01672244258224964   | Co-expression | Mallon-McKay-2013                                                                  |
| CA12   | CXCL5   | 0.016581028699874878  | Co-expression | Wang-Maris-2006                                                                    |
| CXCL6  | CA12    | 0.016061080619692802  | Co-expression | Wang-Maris-2006                                                                    |
| MMP1   | MET     | 0.015004313550889492  | Co-expression | Salaverria-Siebert-2011                                                            |
| CA5A   | CA6     | 0.013614140450954437  | Co-expression | Ramaswamy-Golub-2001                                                               |
| CXCL6  | MMP12   | 0.01343515794724226   | Co-expression | Mallon-McKay-2013                                                                  |
| PPARG  | CA2     | 0.01244678907096386   | Co-expression | Arijs-Rutgeerts-2009<br>Rieger-Chu-2004                                            |
| MMP9   | CYP11A1 | 0.011989451013505459  | Co-expression | Mallon-McKay-2013                                                                  |
| CA5B   | CYP11A1 | 0.010530075058341026  | Co-expression | Mallon-McKay-2013                                                                  |
| MMP1   | CA9     | 0.010340913198888302  | Co-expression | Roth-Zlotnik-2006                                                                  |
| FDX1   | EPHX2   | 0.009916039183735847  | Co-expression | Arijs-Rutgeerts-2009                                                               |
| FDX1   | CA2     | 0.009201055392622948  | Co-expression | Chen-Brown-2002                                                                    |
| MIF    | MMP12   | 0.009009147994220257  | Co-expression | Alizadeh-Staudt-2000<br>Boldrick-Relman-2002                                       |
| MMP1   | CXCL6   | 0.008916885824874043  | Co-expression | Arijs-Rutgeerts-2009<br>Boldrick-Relman-2002                                       |
| CA11   | CA14    | 0.008083850145339966  | Co-expression | Mallon-McKay-2013                                                                  |
| CA7    | CA1     | 0.007495645899325609  | Co-expression | Arijs-Rutgeerts-2009                                                               |
| MMP12  | MET     | 0.0065786163322627544 | Co-expression | Alizadeh-Staudt-2000                                                               |
| CXCL5  | MET     | 0.006402609869837761  | Co-expression | Bild-Nevins-2006 B                                                                 |
| DDT    | EPHX2   | 0.006105517968535423  | Co-expression | Roth-Zlotnik-2006                                                                  |
| CA12   | PPARG   | 0.0056481570936739445 | Co-expression | Arijs-Rutgeerts-2009                                                               |
| CA12   | CA2     | 0.004792694002389908  | Co-expression | Arijs-Rutgeerts-2009                                                               |
| CA1    | CXCL5   | 0.004494811873883009  | Co-expression | Bild-Nevins-2006 B                                                                 |

|        |         |                       |                        |                                          |
|--------|---------|-----------------------|------------------------|------------------------------------------|
| CA7    | CXCL5   | 0.0037256747018545866 | Co-expression          | Bild-Nevins-2006 B                       |
| CA4    | CA2     | 0.0037032561376690865 | Co-expression          | Arijs-Rutgeerts-2009                     |
| CA7    | CA2     | 0.0033373881597071886 | Co-expression          | Arijs-Rutgeerts-2009                     |
| CA1    | CA2     | 0.003328366205096245  | Co-expression          | Arijs-Rutgeerts-2009                     |
| CA5B   | EPHX2   | 0.011935488320887089  | Genetic interactions   | Lin-Smith-2010                           |
| CA13   | EPHX2   | 0.0029491730965673923 | Genetic interactions   | Lin-Smith-2010                           |
| CXCL6  | EPHX2   | 0.0016794513212516904 | Genetic interactions   | Lin-Smith-2010                           |
| CA13   | MAPK14  | 0.001627411344088614  | Genetic interactions   | Lin-Smith-2010                           |
| KIF11  | CA2     | 0.0015893412055447698 | Genetic interactions   | Lin-Smith-2010                           |
| PPARG  | CYP11A1 | 9.334263158962131E-4  | Genetic interactions   | Lin-Smith-2010                           |
| FDX1   | CA10    | 8.189075160771608E-4  | Genetic interactions   | Lin-Smith-2010                           |
| SLC4A8 | CA8     | 7.704430026933551E-4  | Genetic interactions   | Lin-Smith-2010                           |
| MAPK14 | EPHX2   | 7.498431950807571E-4  | Genetic interactions   | Lin-Smith-2010                           |
| CA12   | CA8     | 6.630378193221986E-4  | Genetic interactions   | Lin-Smith-2010                           |
| CA12   | PPARG   | 6.485359044745564E-4  | Genetic interactions   | Lin-Smith-2010                           |
| CA8    | KIF11   | 6.437188130803406E-4  | Genetic interactions   | Lin-Smith-2010                           |
| DDT    | PPARG   | 6.367801688611507E-4  | Genetic interactions   | Lin-Smith-2010                           |
| CA10   | CYP11A1 | 6.214058375917375E-4  | Genetic interactions   | Lin-Smith-2010                           |
| CA12   | MAPK14  | 6.055634003132582E-4  | Genetic interactions   | Lin-Smith-2010                           |
| SLC4A8 | CA10    | 5.016854265704751E-4  | Genetic interactions   | Lin-Smith-2010                           |
| CA8    | PPARG   | 4.8519985284656286E-4 | Genetic interactions   | Lin-Smith-2010                           |
| CA8    | CA10    | 3.230099973734468E-4  | Genetic interactions   | Lin-Smith-2010                           |
| CA10   | PPARG   | 3.159451298415661E-4  | Genetic interactions   | Lin-Smith-2010                           |
| CA10   | MAPK14  | 2.9501033714041114E-4 | Genetic interactions   | Lin-Smith-2010                           |
| MMP1   | PPARG   | 0.018458472564816475  | Pathway                | Wu-Stein-2010                            |
| MMP9   | PPARG   | 0.012255456298589706  | Pathway                | Wu-Stein-2010                            |
| FDX1   | CYP11A1 | 0.7656212449073792    | Physical interactions  | IREF-BIOGRID<br>IREF-SMALL-SCALE-STUDIES |
| SLC4A8 | CA2     | 0.6753623783588409    | Physical interactions  | IREF-BIOGRID<br>IREF-SMALL-SCALE-STUDIES |
| CXCL6  | MMP9    | 0.6474498212337494    | Physical interactions  | IREF-BIOGRID<br>IREF-SMALL-SCALE-STUDIES |
| CXCL5  | MMP9    | 0.61274204403162      | Physical interactions  | IREF-BIOGRID<br>IREF-SMALL-SCALE-STUDIES |
| MMP1   | CXCL6   | 0.11795808374881744   | Physical interactions  | IREF-SMALL-SCALE-STUDIES                 |
| CA9    | CA2     | 0.10896948724985123   | Physical interactions  | IREF-BIOGRID<br>IREF-SMALL-SCALE-STUDIES |
| MMP1   | CXCL5   | 0.06495930254459381   | Physical interactions  | IREF-SMALL-SCALE-STUDIES                 |
| DDTL   | MIF     | 0.9624011516571045    | Shared protein domains | INTERPRO<br>PFAM                         |
| DDT    | MIF     | 0.9624011516571045    | Shared protein domains | INTERPRO<br>PFAM                         |
| DDT    | DDTL    | 0.9624011516571045    | Shared protein domains | INTERPRO<br>PFAM                         |
| CA9    | CA2     | 0.13466692715883255   | Shared protein domains | INTERPRO<br>PFAM                         |
| CA13   | CA2     | 0.13466692715883255   | Shared protein domains | INTERPRO<br>PFAM                         |
| CA13   | CA9     | 0.13466692715883255   | Shared protein domains | INTERPRO<br>PFAM                         |
| CA5B   | CA2     | 0.13466692715883255   | Shared protein domains | INTERPRO<br>PFAM                         |
| CA5B   | CA9     | 0.13466692715883255   | Shared protein domains | INTERPRO<br>PFAM                         |
| CA5B   | CA13    | 0.13466692715883255   | Shared protein domains | INTERPRO<br>PFAM                         |
| CA10   | CA2     | 0.13466692715883255   | Shared protein domains | INTERPRO<br>PFAM                         |
| CA10   | CA9     | 0.13466692715883255   | Shared protein domains | INTERPRO<br>PFAM                         |

|      |      |                     |                        |                  |
|------|------|---------------------|------------------------|------------------|
| CA10 | CA13 | 0.13466692715883255 | Shared protein domains | INTERPRO<br>PFAM |
| CA10 | CA5B | 0.13466692715883255 | Shared protein domains | INTERPRO<br>PFAM |
| CA8  | CA2  | 0.13466692715883255 | Shared protein domains | INTERPRO<br>PFAM |
| CA8  | CA9  | 0.13466692715883255 | Shared protein domains | INTERPRO<br>PFAM |
| CA8  | CA13 | 0.13466692715883255 | Shared protein domains | INTERPRO<br>PFAM |
| CA8  | CA5B | 0.13466692715883255 | Shared protein domains | INTERPRO<br>PFAM |
| CA8  | CA10 | 0.13466692715883255 | Shared protein domains | INTERPRO<br>PFAM |
| CA14 | CA2  | 0.13466692715883255 | Shared protein domains | INTERPRO<br>PFAM |
| CA14 | CA9  | 0.13466692715883255 | Shared protein domains | INTERPRO<br>PFAM |
| CA14 | CA13 | 0.13466692715883255 | Shared protein domains | INTERPRO<br>PFAM |
| CA14 | CA5B | 0.13466692715883255 | Shared protein domains | INTERPRO<br>PFAM |
| CA14 | CA10 | 0.13466692715883255 | Shared protein domains | INTERPRO<br>PFAM |
| CA14 | CA8  | 0.13466692715883255 | Shared protein domains | INTERPRO<br>PFAM |
| CA6  | CA2  | 0.13466692715883255 | Shared protein domains | INTERPRO<br>PFAM |
| CA6  | CA9  | 0.13466692715883255 | Shared protein domains | INTERPRO<br>PFAM |
| CA6  | CA13 | 0.13466692715883255 | Shared protein domains | INTERPRO<br>PFAM |
| CA6  | CA5B | 0.13466692715883255 | Shared protein domains | INTERPRO<br>PFAM |
| CA6  | CA10 | 0.13466692715883255 | Shared protein domains | INTERPRO<br>PFAM |
| CA6  | CA8  | 0.13466692715883255 | Shared protein domains | INTERPRO<br>PFAM |
| CA6  | CA14 | 0.13466692715883255 | Shared protein domains | INTERPRO<br>PFAM |
| CA12 | CA2  | 0.13466692715883255 | Shared protein domains | INTERPRO<br>PFAM |
| CA12 | CA9  | 0.13466692715883255 | Shared protein domains | INTERPRO<br>PFAM |
| CA12 | CA13 | 0.13466692715883255 | Shared protein domains | INTERPRO<br>PFAM |
| CA12 | CA5B | 0.13466692715883255 | Shared protein domains | INTERPRO<br>PFAM |
| CA12 | CA10 | 0.13466692715883255 | Shared protein domains | INTERPRO<br>PFAM |
| CA12 | CA8  | 0.13466692715883255 | Shared protein domains | INTERPRO<br>PFAM |
| CA12 | CA14 | 0.13466692715883255 | Shared protein domains | INTERPRO<br>PFAM |
| CA12 | CA6  | 0.13466692715883255 | Shared protein domains | INTERPRO<br>PFAM |
| CA1  | CA2  | 0.13466692715883255 | Shared protein domains | INTERPRO<br>PFAM |
| CA1  | CA9  | 0.13466692715883255 | Shared protein domains | INTERPRO<br>PFAM |
| CA1  | CA13 | 0.13466692715883255 | Shared protein domains | INTERPRO<br>PFAM |
| CA1  | CA5B | 0.13466692715883255 | Shared protein domains | INTERPRO         |

|     |      |                     |                        | PFAM             |
|-----|------|---------------------|------------------------|------------------|
| CA1 | CA10 | 0.13466692715883255 | Shared protein domains | INTERPRO<br>PFAM |
| CA1 | CA8  | 0.13466692715883255 | Shared protein domains | INTERPRO<br>PFAM |
| CA1 | CA14 | 0.13466692715883255 | Shared protein domains | INTERPRO<br>PFAM |
| CA1 | CA6  | 0.13466692715883255 | Shared protein domains | INTERPRO<br>PFAM |
| CA1 | CA12 | 0.13466692715883255 | Shared protein domains | INTERPRO<br>PFAM |
| CA4 | CA2  | 0.13466692715883255 | Shared protein domains | INTERPRO<br>PFAM |
| CA4 | CA9  | 0.13466692715883255 | Shared protein domains | INTERPRO<br>PFAM |
| CA4 | CA13 | 0.13466692715883255 | Shared protein domains | INTERPRO<br>PFAM |
| CA4 | CA5B | 0.13466692715883255 | Shared protein domains | INTERPRO<br>PFAM |
| CA4 | CA10 | 0.13466692715883255 | Shared protein domains | INTERPRO<br>PFAM |
| CA4 | CA8  | 0.13466692715883255 | Shared protein domains | INTERPRO<br>PFAM |
| CA4 | CA14 | 0.13466692715883255 | Shared protein domains | INTERPRO<br>PFAM |
| CA4 | CA6  | 0.13466692715883255 | Shared protein domains | INTERPRO<br>PFAM |
| CA4 | CA12 | 0.13466692715883255 | Shared protein domains | INTERPRO<br>PFAM |
| CA4 | CA1  | 0.13466692715883255 | Shared protein domains | INTERPRO<br>PFAM |
| CA3 | CA2  | 0.13466692715883255 | Shared protein domains | INTERPRO<br>PFAM |
| CA3 | CA9  | 0.13466692715883255 | Shared protein domains | INTERPRO<br>PFAM |
| CA3 | CA13 | 0.13466692715883255 | Shared protein domains | INTERPRO<br>PFAM |
| CA3 | CA5B | 0.13466692715883255 | Shared protein domains | INTERPRO<br>PFAM |
| CA3 | CA10 | 0.13466692715883255 | Shared protein domains | INTERPRO<br>PFAM |
| CA3 | CA8  | 0.13466692715883255 | Shared protein domains | INTERPRO<br>PFAM |
| CA3 | CA14 | 0.13466692715883255 | Shared protein domains | INTERPRO<br>PFAM |
| CA3 | CA6  | 0.13466692715883255 | Shared protein domains | INTERPRO<br>PFAM |
| CA3 | CA12 | 0.13466692715883255 | Shared protein domains | INTERPRO<br>PFAM |
| CA3 | CA1  | 0.13466692715883255 | Shared protein domains | INTERPRO<br>PFAM |
| CA3 | CA4  | 0.13466692715883255 | Shared protein domains | INTERPRO<br>PFAM |
| CA7 | CA2  | 0.13466692715883255 | Shared protein domains | INTERPRO<br>PFAM |
| CA7 | CA9  | 0.13466692715883255 | Shared protein domains | INTERPRO<br>PFAM |
| CA7 | CA13 | 0.13466692715883255 | Shared protein domains | INTERPRO<br>PFAM |
| CA7 | CA5B | 0.13466692715883255 | Shared protein domains | INTERPRO<br>PFAM |
| CA7 | CA10 | 0.13466692715883255 | Shared protein domains | INTERPRO         |

|      |      |                     |                        | PFAM             |
|------|------|---------------------|------------------------|------------------|
| CA7  | CA8  | 0.13466692715883255 | Shared protein domains | INTERPRO<br>PFAM |
| CA7  | CA14 | 0.13466692715883255 | Shared protein domains | INTERPRO<br>PFAM |
| CA7  | CA6  | 0.13466692715883255 | Shared protein domains | INTERPRO<br>PFAM |
| CA7  | CA12 | 0.13466692715883255 | Shared protein domains | INTERPRO<br>PFAM |
| CA7  | CA1  | 0.13466692715883255 | Shared protein domains | INTERPRO<br>PFAM |
| CA7  | CA4  | 0.13466692715883255 | Shared protein domains | INTERPRO<br>PFAM |
| CA7  | CA3  | 0.13466692715883255 | Shared protein domains | INTERPRO<br>PFAM |
| CA5A | CA2  | 0.13466692715883255 | Shared protein domains | INTERPRO<br>PFAM |
| CA5A | CA9  | 0.13466692715883255 | Shared protein domains | INTERPRO<br>PFAM |
| CA5A | CA13 | 0.13466692715883255 | Shared protein domains | INTERPRO<br>PFAM |
| CA5A | CA5B | 0.13466692715883255 | Shared protein domains | INTERPRO<br>PFAM |
| CA5A | CA10 | 0.13466692715883255 | Shared protein domains | INTERPRO<br>PFAM |
| CA5A | CA8  | 0.13466692715883255 | Shared protein domains | INTERPRO<br>PFAM |
| CA5A | CA14 | 0.13466692715883255 | Shared protein domains | INTERPRO<br>PFAM |
| CA5A | CA6  | 0.13466692715883255 | Shared protein domains | INTERPRO<br>PFAM |
| CA5A | CA12 | 0.13466692715883255 | Shared protein domains | INTERPRO<br>PFAM |
| CA5A | CA1  | 0.13466692715883255 | Shared protein domains | INTERPRO<br>PFAM |
| CA5A | CA4  | 0.13466692715883255 | Shared protein domains | INTERPRO<br>PFAM |
| CA5A | CA3  | 0.13466692715883255 | Shared protein domains | INTERPRO<br>PFAM |
| CA5A | CA7  | 0.13466692715883255 | Shared protein domains | INTERPRO<br>PFAM |
| CA11 | CA2  | 0.13466692715883255 | Shared protein domains | INTERPRO<br>PFAM |
| CA11 | CA9  | 0.13466692715883255 | Shared protein domains | INTERPRO<br>PFAM |
| CA11 | CA13 | 0.13466692715883255 | Shared protein domains | INTERPRO<br>PFAM |
| CA11 | CA5B | 0.13466692715883255 | Shared protein domains | INTERPRO<br>PFAM |
| CA11 | CA10 | 0.13466692715883255 | Shared protein domains | INTERPRO<br>PFAM |
| CA11 | CA8  | 0.13466692715883255 | Shared protein domains | INTERPRO<br>PFAM |
| CA11 | CA14 | 0.13466692715883255 | Shared protein domains | INTERPRO<br>PFAM |
| CA11 | CA6  | 0.13466692715883255 | Shared protein domains | INTERPRO<br>PFAM |
| CA11 | CA12 | 0.13466692715883255 | Shared protein domains | INTERPRO<br>PFAM |
| CA11 | CA1  | 0.13466692715883255 | Shared protein domains | INTERPRO<br>PFAM |
| CA11 | CA4  | 0.13466692715883255 | Shared protein domains | INTERPRO         |

|       |       |                     |                        | PFAM             |
|-------|-------|---------------------|------------------------|------------------|
| CA11  | CA3   | 0.13466692715883255 | Shared protein domains | INTERPRO<br>PFAM |
| CA11  | CA7   | 0.13466692715883255 | Shared protein domains | INTERPRO<br>PFAM |
| CA11  | CA5A  | 0.13466692715883255 | Shared protein domains | INTERPRO<br>PFAM |
| MMP1  | MMP12 | 0.08611704409122467 | Shared protein domains | INTERPRO<br>PFAM |
| MMP9  | MMP12 | 0.06935350596904755 | Shared protein domains | INTERPRO<br>PFAM |
| MMP1  | MMP9  | 0.06908712908625603 | Shared protein domains | INTERPRO<br>PFAM |
| CXCL6 | CXCL5 | 0.05678102932870388 | Shared protein domains | INTERPRO<br>PFAM |

Search results generated by the GeneMANIA algorithm ([genemania.org](http://genemania.org))

# GENEMANIA

## Report of GeneMANIA search

### Network image

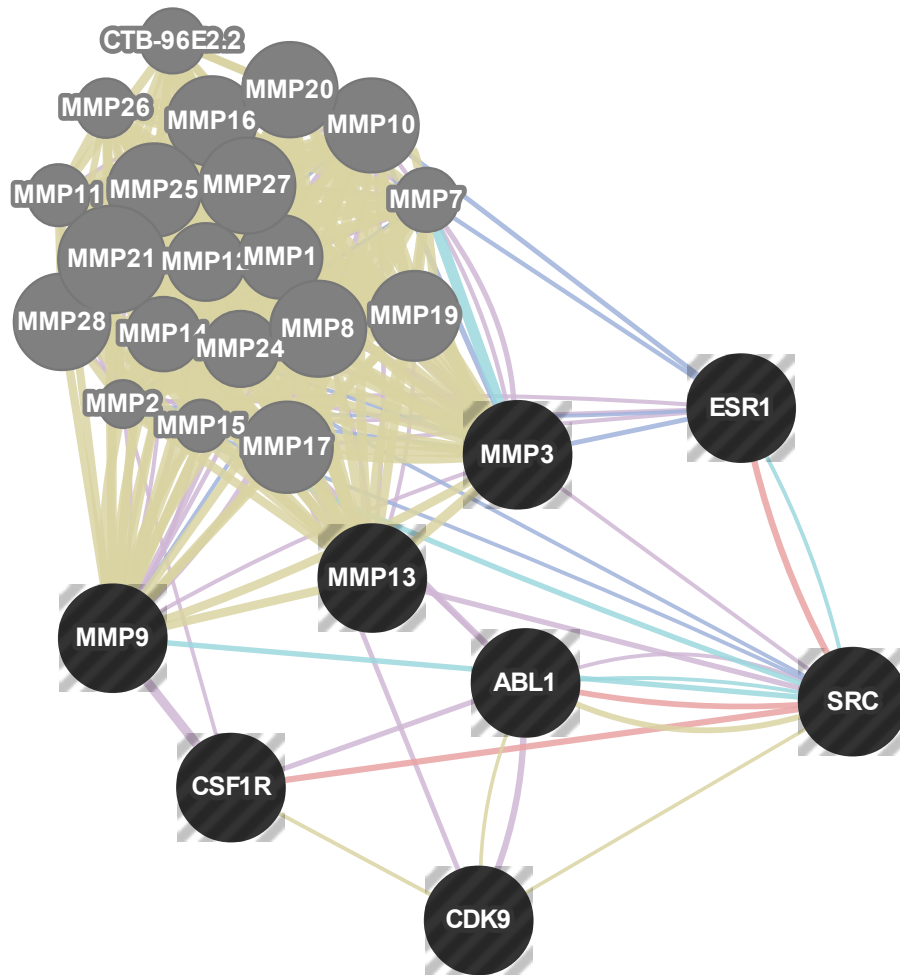

#### Functions legend

■ query genes

#### Networks legend

■ Co-expression

■ Co-localization

■ Pathway

■ Physical interactions

■ Shared protein domains

## Search parameters

Organism: *H. sapiens* (human)

Genes: P03372; P00519; P14780; P50750; P45452; P08254; P07333; P12931

Networks:

### Attributes:

#### Co-expression:

Alizadeh-Staudt-2000 Arijs-Rutgeerts-2009 Bahr-Bowler-2013 Bild-Nevins-2006 B  
 Boldrick-Relman-2002 Burington-Shaughnessy-2008 Chen-Brown-2002 Cheok-Evans-2003  
 Gysin-McMahon-2012 Innocenti-Brown-2011 Kang-Willman-2010 Mallon-McKay-2013  
 Perou-Botstein-1999 Ramaswamy-Golub-2001 Rieger-Chu-2004 Roth-Zlotnik-2006  
 Salaverria-Siebert-2011 Smirnov-Cheung-2009 Wang-Maris-2006 Wu-Garvey-2007

#### Co-localization:

Johnson-Shoemaker-2003 Satoh-Yamamoto-2013 Schadt-Shoemaker-2004

#### Genetic interactions:

BIOGRID-SMALL-SCALE-STUDIES IREF-SMALL-SCALE-STUDIES Lin-Boeke-2012 A Lin-Boeke-2012 B  
 Lin-Smith-2010 Toyoshima-Grandori-2012 Willingham-Muchowski-2003

#### Pathway:

PATHWAYCOMMONS-CELL\_MAP PATHWAYCOMMONS-HUMANCYC PATHWAYCOMMONS-IMID  
 PATHWAYCOMMONS-NCI\_NATURE PATHWAYCOMMONS-REACTOME Wu-Stein-2010

#### Physical interactions:

Abu-Odeh-Aqeilan-2014 Agrawal-Sedivy-2010 Aichele-Groettrup-2012 Albers-Koegl-2005  
 Alexandru-Deshais-2008 Altun-Kessler-2011 Andresen-Flores-Morales-2014 Arbuckle-Grant-2010  
 Arora-Mercola-2008 BIOGRID-SMALL-SCALE-STUDIES Bandyopadhyay-Ideker-2010  
 Bantscheff-Drewes-2011 Barr-Knapp-2009 Barrios-Rodiles-Wrana-2005 Behrends-Harper-2010  
 Behzadnia-Lührmann-2007 Bennett-Harper-2010 Benzinger-Hermeking-2005 Berggård-James-2006  
 Bett-Hay-2013 Blandin-Richard-2013 Bouwmeester-Superti-Furga-2004 Brajenovic-Drewes-2004  
 Brehme-Superti-Furga-2009 Bruderer-Hay-2011 Byron-Humphries-2012 Cai-Conaway-2007  
 Camargo-Brandon-2007 Cannavo-Jiricny-2007 Cao-Chinnaiyan-2014 Chen-Ge-2013 Chen-Naus-2012  
 Chen-Zhang-2013 Cheng-Chen-2010 Cloutier-Coulombe-2013 Colland-Gauthier-2004  
 Couzens-Gingras-2013 Cox-Rizzino-2013 Danielsen-Nielsen-2011 Dyer-Sobral-2010  
 Emanuele-Elledge-2011 Ewing-Figeys-2007 Fenner-Prehn-2010 Foerster-Ritter-2013  
 Foster-Marshall-2013 Freibaum-Taylor-2010 Gao-Reinberg-2012 Gautier-Hall-2009 Giannone-Liu-2010  
 Glatzer-Gstaiger-2009 Gloeckner-Ueffing-2007 Goehler-Wanker-2004 Golebiowski-Hay-2009  
 Goudreault-Gingras-2009 Grant-2010 Greco-Cristea-2011 Havrylov-Redowicz-2009  
 Havugimana-Emili-2012 Hayes-Urbé-2012 Hegele-Stelzl-2012 A Hegele-Stelzl-2012 B  
 Humphries-Humphries-2009 Hutchins-Peters-2010 IREF-BIND IREF-BIOGRID IREF-DIP IREF-HPRD  
 IREF-INNATEDB IREF-INTACT IREF-MATRIXDB IREF-MPPI IREF-OPHID IREF-PUBMED  
 IREF-SMALL-SCALE-STUDIES Ingham-Pawson-2005 Jeronimo-Coulombe-2007 Jin-Pawson-2004  
 Jones-MacBeath-2006 Joshi-Cristea-2013 Jäger-Krogan-2012 Kahle-Zoghbi-2011 Kim-Gygi-2011  
 Kneissl-Grummt-2003 Koch-Hermeking-2007 Kristensen-Foster-2012 Lau-Ronai-2012  
 Lee-Doedens-2011 Lee-Songyang-2011 Lehner-Sanderson-2004 A Lehner-Sanderson-2004 B  
 Leng-Wang-2014 Li-Dorf-2011 A Li-Dorf-2011 B Lim-Zoghbi-2006 Liu-Wang-2012  
 Loch-Strickler-2012 Lopitz-Otsoa-Rodriguez-2012 Lu-Zhang-2013 Mak-Moffat-2010  
 Malovannaya-Qin-2010 Markson-Sanderson-2009 Maréchal-Zou-2014 Matafora-Bachi-2009  
 Matsumoto-Nakayama-2005 McCracken-Blencowe-2005 McFarland-Nussbaum-2008  
 Meek-Piwnica-Worms-2004 Meierhofer-Kaiser-2008 Miyamoto-Sato-Yanagawa-2010  
 Nakayama-Ohara-2002 Nakayasu-Adkins-2013 Napolitano-Meroni-2011 Nathan-Goldberg-2013  
 Neganova-Lako-2011 Newman-Keating-2003 Olma-Pintard-2009 Oláh-Ovádi-2011  
 Oshikawa-Nakayama-2012 Ouyang-Gill-2009 Panigrahi-Pati-2012 Perez-Hernandez-Yáñez-Mó-2013  
 Persaud-Rotin-2009 Pichlmair-Superti-Furga-2011 Pichlmair-Superti-Furga-2012 Pilot-Storck-Goillot-2010  
 Povsen-Choudhary-2012 Ramachandran-LaBaer-2004 Ravasi-Hayashizaki-2010 Reinke-Keating-2013  
 Richter-Chrzanowska-Lightowlers-2010 Roux-Burke-2012 Rowbotham-Mermoud-2011 Roy-Parent-2013  
 Rual-Vidal-2005 A Rual-Vidal-2005 B San-Marina-Minden-2008 Sang-Jackson-2011  
 Sato-Conaway-2004 Shi-Qin-2011 Singh-Moore-2012 Soler-López-Aloy-2011 Sowa-Harper-2009  
 Stehling-Lill-2012 Stelzl-Wanker-2005 Suter-Wanker-2013 Taipale-Lindquist-2012  
 Takahashi-Conaway-2011 Tarallo-Weisz-2011 Tatham-Hay-2011 Teixeira-Gomes-2010  
 Thalappilly-Duseti-2008 Tsai-Cristea-2012 Udeshi-Carr-2012 Vandamme-Angrand-2011  
 Vanderwerf-Bagby-2009 Varjosalo-Gstaiger-2013 A Varjosalo-Gstaiger-2013 B  
 Varjosalo-Superti-Furga-2013 Venkatesan-Vidal-2009 Vinayagam-Wanker-2011 Wagner-Choudhary-2011  
 Wallach-Kramer-2013 Wang-Balch-2006 Wang-He-2008 Wang-Yang-2011 Weimann-Stelzl-2013 A  
 Weimann-Stelzl-2013 B Weinmann-Meister-2009 Wilker-Yaffe-2007 Wong-O'Bryan-2012  
 Woods-Monteiro-2012 Woodsmith-Sanderson-2012 Wu-Li-2007 Wu-Ma-2012 Xiao-Lefkowitz-2007



Xie-Cong-2013 Xu-Jaffrey-2010 Xu-Ye-2012 Yang-Chen-2010 Yatim-Benkirane-2012 Yu-Chow-2013  
Yu-Vidal-2011 Zanon-Pichler-2013 Zhang-Zou-2011 Zhao-Krug-2005 Zhao-Yang-2011  
Zhou-Conrads-2004 Zhou-Liang-2012 de Hoog-Mann-2004 van Wijk-Timmers-2009

**Predicted:**

I2D-BIND-Fly2Human I2D-BIND-Mouse2Human I2D-BIND-Rat2Human I2D-BIND-Worm2Human  
I2D-BIND-Yeast2Human I2D-BioGRID-Fly2Human I2D-BioGRID-Mouse2Human I2D-BioGRID-Rat2Human  
I2D-BioGRID-Worm2Human I2D-BioGRID-Yeast2Human  
I2D-Chen-Pawson-2009-PiwiScreen-Mouse2Human I2D-Formstecher-Daviet-2005-Embryo-Fly2Human  
I2D-Giot-Rothbert-2003-Low-Fly2Human I2D-INNATEDB-Mouse2Human I2D-IntAct-Fly2Human  
I2D-IntAct-Mouse2Human I2D-IntAct-Rat2Human I2D-IntAct-Worm2Human I2D-IntAct-Yeast2Human  
I2D-Krogan-Greenblatt-2006-Core-Yeast2Human I2D-Krogan-Greenblatt-2006-NonCore-Yeast2Human  
I2D-Li-Vidal-2004-CORE-1-Worm2Human I2D-Li-Vidal-2004-non-core-Worm2Human  
I2D-MGI-Mouse2Human I2D-MINT-Fly2Human I2D-MINT-Mouse2Human I2D-MINT-Rat2Human  
I2D-MINT-Worm2Human I2D-MINT-Yeast2Human I2D-Manual-Mouse2Human I2D-Manual-Rat2Human  
I2D-Ptacek-Snyder-2005-Yeast2Human I2D-Tarassov-PCA-Yeast2Human  
I2D-Tewari-Vidal-2004-TGFb-Worm2Human I2D-Wang-Orkin-2006-EScmplx-Mouse2Human  
I2D-Wang-Orkin-2006-EScmplxlow-Mouse2Human I2D-Yu-Vidal-2008-GoldStd-Yeast2Human  
I2D-vonMering-Bork-2002-High-Yeast2Human I2D-vonMering-Bork-2002-Low-Yeast2Human  
I2D-vonMering-Bork-2002-Medium-Yeast2Human Stuart-Kim-2003

**Shared protein domains:**

INTERPRO PFAM

Network weighting: Automatically selected weighting method (Assigned based on query genes)

Number of gene results: 20

## Networks

|                                                                                                                                                                                                                          |                |
|--------------------------------------------------------------------------------------------------------------------------------------------------------------------------------------------------------------------------|----------------|
| <b>Shared protein domains</b>                                                                                                                                                                                            | <b>47.52 %</b> |
| <b>PFAM</b>                                                                                                                                                                                                              | <b>25.45 %</b> |
| Source: <a href="#">Pearson correlation</a> with 543,464 interactions from <a href="#">Pfam</a>                                                                                                                          |                |
| <b>INTERPRO</b>                                                                                                                                                                                                          | <b>22.07 %</b> |
| Source: <a href="#">Pearson correlation</a> with 562,560 interactions from <a href="#">InterPro</a>                                                                                                                      |                |
| <b>Co-expression</b>                                                                                                                                                                                                     | <b>41.88 %</b> |
| <b>Burington-Shaughnessy-2008</b>                                                                                                                                                                                        | <b>6.05 %</b>  |
| <a href="#">Tumor cell gene expression changes following short-term in vivo exposure to single agent chemotherapeutics are related to survival in multiple myeloma.</a> Burington et al. (2008). <i>Clin Cancer Res.</i> |                |
| Source: <a href="#">Pearson correlation</a> with 293,587 interactions from <a href="#">GEO</a>                                                                                                                           |                |
| Tags: transcription factors; time series; cancer; chemotherapy                                                                                                                                                           |                |
| <b>Bahr-Bowler-2013</b>                                                                                                                                                                                                  | <b>5.73 %</b>  |
| <a href="#">Peripheral blood mononuclear cell gene expression in chronic obstructive pulmonary disease.</a> Bahr et al. (2013). <i>Am J Respir Cell Mol Biol.</i>                                                        |                |
| Source: <a href="#">Pearson correlation</a> with 278,447 interactions from <a href="#">GEO</a>                                                                                                                           |                |
| <b>Alizadeh-Staudt-2000</b>                                                                                                                                                                                              | <b>5.46 %</b>  |
| <a href="#">Distinct types of diffuse large B-cell lymphoma identified by gene expression profiling.</a> Alizadeh et al. (2000). <i>Nature.</i>                                                                          |                |
| Source: <a href="#">Pearson correlation</a> with 88,888 interactions from supplementary material                                                                                                                         |                |
| Tags: cultured cells; cancer                                                                                                                                                                                             |                |
| <b>Bild-Nevins-2006 B</b>                                                                                                                                                                                                | <b>5.08 %</b>  |
| <a href="#">Oncogenic pathway signatures in human cancers as a guide to targeted therapies.</a> Bild et al. (2006). <i>Nature.</i>                                                                                       |                |
| Note: One of 3 datasets produced from this publication.                                                                                                                                                                  |                |
| Source: <a href="#">Pearson correlation</a> with 282,582 interactions from <a href="#">GEO</a>                                                                                                                           |                |
| Tags: cultured cells; signal transduction; cancer; epithelial cells; cell line; disease; breast; transcription factors; breast cancer                                                                                    |                |
| <b>Boldrick-Relman-2002</b>                                                                                                                                                                                              | <b>4.96 %</b>  |
| <a href="#">Stereotyped and specific gene expression programs in human innate immune responses to bacteria.</a> Boldrick et al. (2002). <i>Proc Natl Acad Sci U S A.</i>                                                 |                |
| Source: <a href="#">Pearson correlation</a> with 108,543 interactions from supplementary material                                                                                                                        |                |
| Tags: immune system                                                                                                                                                                                                      |                |
| <b>Arijs-Rutgeerts-2009</b>                                                                                                                                                                                              | <b>4.05 %</b>  |
| <a href="#">Mucosal gene expression of antimicrobial peptides in inflammatory bowel disease before and after first infliximab treatment.</a> Arijs et al. (2009). <i>PLoS One.</i>                                       |                |
| Source: <a href="#">Pearson correlation</a> with 653,194 interactions from <a href="#">GEO</a>                                                                                                                           |                |
| Tags: immune system                                                                                                                                                                                                      |                |
| <b>Ramaswamy-Golub-2001</b>                                                                                                                                                                                              | <b>3.89 %</b>  |
| <a href="#">Multiclass cancer diagnosis using tumor gene expression signatures.</a> Ramaswamy et al. (2001). <i>Proc Natl Acad Sci U S A.</i>                                                                            |                |
| Source: <a href="#">Pearson correlation</a> with 270,142 interactions from supplementary material                                                                                                                        |                |
| Tags: cancer                                                                                                                                                                                                             |                |
| <b>Chen-Brown-2002</b>                                                                                                                                                                                                   | <b>2.86 %</b>  |
| <a href="#">Gene expression patterns in human liver cancers.</a> Chen et al. (2002). <i>Mol Biol Cell.</i>                                                                                                               |                |

Source: [Pearson correlation](#) with 275,649 interactions from supplementary material

Tags: cell proliferation; transcription factors; liver; cancer

**Perou-Botstein-1999** **2.68 %**

[Distinctive gene expression patterns in human mammary epithelial cells and breast cancers.](#) Perou et al. (1999). *Proc Natl Acad Sci U S A*.

Source: [Pearson correlation](#) with 62,886 interactions from supplementary material

Tags: cultured cells; cancer; epithelial cells; signal transduction; breast; stromal cells; transcription factors; breast cancer

**Smirnov-Cheung-2009** **1.11 %**

[Genetic analysis of radiation-induced changes in human gene expression.](#) Smirnov et al. (2009). *Nature*.

Source: [Pearson correlation](#) with 463,390 interactions from [GEO](#)

Tags: transcription factors; cultured cells; cell line

**Co-localization** **4.22 %**

**Johnson-Shoemaker-2003** **4.22 %**

[Genome-wide survey of human alternative pre-mRNA splicing with exon junction microarrays.](#) Johnson et al. (2003). *Science*.

Source: [Pearson correlation](#) with 426,640 interactions from [GEO](#)

Tags: cultured cells; cell line

**Physical interactions** **4.00 %**

**IREF-INTACT** **1.52 %**

Source: [Direct interaction](#) with 42,475 interactions from [iRefIndex](#)

**IREF-DIP** **1.18 %**

Source: [Direct interaction](#) with 3,719 interactions from [iRefIndex](#)

**IREF-BIND** **0.93 %**

Source: [Direct interaction](#) with 7,078 interactions from [iRefIndex](#)

**IREF-BIOGRID** **0.37 %**

Source: [Direct interaction](#) with 127,207 interactions from [iRefIndex](#)

**Pathway** **2.38 %**

**PATHWAYCOMMONS-NCI\_NATURE** **1.48 %**

Source: [Direct interaction](#) with 10,109 interactions from [Pathway Commons](#)

**Wu-Stein-2010** **0.90 %**

[A human functional protein interaction network and its application to cancer data analysis.](#) Wu et al. (2010). *Genome Biol*.

Source: 78,183 interactions from supplementary material

Tags: transcription factors; cancer

---

## Attributes

---

| <u>Attribute</u> | <u>Gene</u> |
|------------------|-------------|
|------------------|-------------|

## Genes

**MMP13 (P45452)** matrix metallopeptidase 13 (collagenase 3) [Source:HGNC Symbol;Acc:7159]

Functions:

Synonyms: ENSG00000137745; ENSG00000262325; ENSP00000260302; ENSP00000339672; ENSP00000460695; ENSP00000461440; 4322; MMP13; NP\_002418; NM\_002427; CLG3; MMP13\_HUMAN; P45452;

More at [Entrez](#)

**SRC (P12931)** v-src avian sarcoma (Schmidt-Ruppin A-2) viral oncogene homolog [Source:HGNC Symbol;Acc:11283]

Functions:

Synonyms: ENSG00000197122; ENSP00000350941; ENSP00000353950; ENSP00000362659; ENSP00000362668; ENSP00000362680; ENSP00000408503; 6714; SRC; NP\_005408; NP\_938033; NM\_005417; NM\_198291; ASV; c-src; P12931; SRC\_HUMAN;

More at [Entrez](#)

**MMP3 (P08254)** matrix metallopeptidase 3 (stromelysin 1, progelatinase) [Source:HGNC Symbol;Acc:7173]

Functions:

Synonyms: ENSG00000149968; ENSG00000263313; ENSP00000299855; ENSP00000398346; ENSP00000435255; ENSP00000458496; ENSP00000459512; ENSP00000459712; 4314; MMP3; NP\_002413; NM\_002422; STMY; STMY1; MMP3\_HUMAN; P08254;

More at [Entrez](#)

**ESR1 (P03372)** estrogen receptor 1 [Source:HGNC Symbol;Acc:3467]

Functions:

Synonyms: ENSG00000091831; ENSP00000206249; ENSP00000342630; ENSP00000384064; ENSP00000385373; ENSP00000387500; ENSP00000394721; ENSP00000401995; ENSP00000405330; ENSP00000411105; ENSP00000415934; 2099; ESR1; NP\_000116; NP\_001116212; NP\_001116213; NP\_001116214; NM\_000125; NM\_001122740; NM\_001122741; NM\_001122742; Era; ESR; NR3A1; ESR1\_HUMAN; P03372;

More at [Entrez](#)

**MMP9 (P14780)** matrix metallopeptidase 9 (gelatinase B, 92kDa gelatinase, 92kDa type IV collagenase) [Source:HGNC Symbol;Acc:7173]

Functions:

Synonyms: ENSG00000100985; ENSP00000361405; 4318; MMP9; NP\_004985; NM\_004994; CLG4B; MMP9\_HUMAN; P14780;

More at [Entrez](#)

**CSF1R (P07333)** colony stimulating factor 1 receptor [Source:HGNC Symbol;Acc:2433]

Functions:

Synonyms: ENSG00000182578; ENSP00000286301; ENSP00000421174; ENSP00000422212; ENSP00000427545; ENSP00000445282; 1436; CSF1R; NP\_005202; NM\_005211; C-FMS; CD115; CSFR; FMS; CSF1R\_HUMAN; P07333;

More at [Entrez](#)

**CDK9 (P50750)** cyclin-dependent kinase 9 [Source:HGNC Symbol;Acc:1780]

Functions:

Synonyms: ENSG00000136807; ENSP00000362361; ENSP00000362362; ENSP00000395872; 1025; CDK9; NP\_001252; NM\_001261; C-2k; CDC2L4; PITALRE; TAK; CDK9\_HUMAN; P50750;

More at [Entrez](#)

**ABL1 (P00519)** c-abl oncogene 1, non-receptor tyrosine kinase [Source:HGNC Symbol;Acc:76]

Functions:

Synonyms: ENSG00000097007; ENSP00000323315; ENSP00000361423; ENSP00000376971; 25; ABL1; NP\_005148; NP\_009297; NM\_005157; NM\_007313; c-ABL; JTK7; ABL1\_HUMAN; P00519;

More at [Entrez](#)

**MMP21** matrix metallopeptidase 21 [Source:HGNC Symbol;Acc:14357] 2.80

Functions:

Synonyms: ENSG00000154485; ENSP00000357798; 118856; MMP21; NP\_671724; NM\_147191; MMP21\_HUMAN; Q8N119;

More at [Entrez](#)

**MMP28** matrix metallopeptidase 28 [Source:HGNC Symbol;Acc:14366] 2.67

Functions:

Synonyms: ENSG00000129270; ENSG00000271447; ENSP00000250144; ENSP00000464731; ENSP00000466155; ENSP00000466671; ENSP00000467034; ENSP00000468241; ENSP00000468249; ENSP00000468709; ENSP00000473853; 79148; MMP28; NP\_001027449; NP\_077278; NM\_001032278; NM\_024302; EPILYSIN; MM28; MMP-25; MMP-28; MMP28\_HUMAN; Q9H239;

More at [Entrez](#)

**MMP27** matrix metallopeptidase 27 [Source:HGNC Symbol;Acc:14250] 2.66

Functions:

Synonyms: ENSG00000137675; ENSP00000260229; 64066; MMP27; NP\_071405; NM\_022122; MMP27\_HUMAN; Q9H306;

More at [Entrez](#)

**MMP8** matrix metallopeptidase 8 (neutrophil collagenase) [Source:HGNC Symbol;Acc:7175] 2.66

Functions:

Synonyms: ENSG00000118113; ENSP00000236826; ENSP00000401004; ENSP00000431431; ENSP00000431938; ENSP00000433812; ENSP00000437173; 4317; MMP8; NP\_002415; NM\_002424; CLG1; MMP8\_HUMAN; P22894;

More at [Entrez](#)

**MMP20** matrix metallopeptidase 20 [Source:HGNC Symbol;Acc:7167] 2.66

Functions:

Synonyms: ENSG00000137674; ENSP00000260228; 9313; MMP20; NP\_004762; NM\_004771; MMP20\_HUMAN; O60882;

More at [Entrez](#)

**MMP10** matrix metallopeptidase 10 (stromelysin 2) [Source:HGNC Symbol;Acc:7156] 2.64

Functions:

Synonyms: ENSG00000166670; ENSP00000279441; ENSP00000441485; 4319; MMP10; NP\_002416; NM\_002425; STMY2; MMP10\_HUMAN; P09238;

More at [Entrez](#)

**MMP25** matrix metallopeptidase 25 [Source:HGNC Symbol;Acc:14246] 2.63

Functions:

1314

Synonyms: ENSG00000008516; ENSP00000337816; 64386; MMP25; NP\_071913; NM\_022468; MMPL1; MT6-MMP; MMP25\_HUMAN; Q9NPA2;

More at [Entrez](#)

**MMP17** matrix metallopeptidase 17 (membrane-inserted) [Source:HGNC Symbol;Acc:7163] 2.61

Functions:

Synonyms: ENSG00000198598; ENSP00000353767; ENSP00000439542; ENSP00000441106; ENSP00000441710; ENSP00000442104; ENSP00000443727; ENSP00000444603; ENSP00000445620; 4326; MMP17; NP\_057239; NM\_016155; MT4-MMP; MMP17\_HUMAN; Q9ULZ9;

More at [Entrez](#)

**MMP16** matrix metallopeptidase 16 (membrane-inserted) [Source:HGNC Symbol;Acc:7162] 2.59

Functions:

489

Synonyms: ENSG00000156103; ENSP00000286614; ENSP00000429147; 4325; MMP16; NP\_005932; NM\_005941; C8orf57; DKFZp761D112; MT3-MMP; MMP16\_HUMAN; P51512;

More at [Entrez](#)

**MMP19** matrix metallopeptidase 19 [Source:HGNC Symbol;Acc:7165] 2.59

Functions:

234567891314

Synonyms: ENSG00000123342; ENSP00000313437; ENSP00000377736; ENSP00000386625; ENSP00000446776; ENSP00000446979; ENSP00000447363; ENSP00000449752; 4327; MMP19; NP\_001259030; NP\_002420; NM\_002429; MMP18; RASI-1; MMP19\_HUMAN; Q99542;

More at [Entrez](#)

**MMP1** matrix metallopeptidase 1 (interstitial collagenase) [Source:HGNC Symbol;Acc:7155] 2.52

Functions:

23456789101112

Synonyms: ENSG00000196611; ENSP00000322788; 4312; MMP1; NP\_001139410; NP\_002412; NM\_001145938; NM\_002421; MMP1\_HUMAN; P03956;

More at [Entrez](#)

**MMP12** matrix metallopeptidase 12 (macrophage elastase) [Source:HGNC Symbol;Acc:7158] 2.45

Functions:

23456789101112

Synonyms: ENSG00000262406; ENSP00000458585; 4321; MMP12; NP\_002417; NM\_002426; HME; MMP12\_HUMAN; P39900;

More at [Entrez](#)

**MMP24** matrix metallopeptidase 24 (membrane-inserted) [Source:HGNC Symbol;Acc:7172] 2.43

Functions:

Synonyms: ENSG00000125966; ENSP00000246186; 10893; MMP24; NP\_006681; NM\_006690; MT5-MMP; MMP24\_HUMAN; Q9Y5R2;

More at [Entrez](#)

**MMP14** matrix metallopeptidase 14 (membrane-inserted) [Source:HGNC Symbol;Acc:7160] 2.41

Functions:

23456789

Synonyms: ENSG00000157227; ENSP00000308208; ENSP00000446989; ENSP00000450323; 4323; MMP14; NP\_004986; NM\_004995; MT1-MMP; MMP14\_HUMAN; P50281;

More at [Entrez](#)

CTB-96E2.2 Uncharacterized protein [Source:UniProtKB/TrEMBL;Acc:H0YJW9] 2.30

Functions:

Synonyms: ENSG00000262318; ENSG00000273171; ENSP00000452347; ENSP00000460756; CTB-96E2.2;

More at [Ensembl](#)

MMP7 matrix metalloproteinase 7 (matrilysin, uterine) [Source:HGNC Symbol;Acc:7174] 2.29

Functions:

2  3  4  5  6  7  8  9

Synonyms: ENSG00000137673; ENSP00000260227; 4316; MMP7; NP\_002414; NM\_002423; MPSL1; PUMP-1; MMP7\_HUMAN; P09237;

More at [Entrez](#)

MMP11 matrix metalloproteinase 11 (stromelysin 3) [Source:HGNC Symbol;Acc:7157] 2.26

Functions:

2  3  4  5  6  7  8  9      13

Synonyms: ENSG00000099953; ENSP00000215743; ENSP00000408070; ENSP00000409860; ENSP00000412107; 4320; MMP11; NP\_005931; NM\_005940; STMY3; MMP11\_HUMAN; P24347;

More at [Entrez](#)

MMP26 matrix metalloproteinase 26 [Source:HGNC Symbol;Acc:14249] 2.23

Functions:

13  14

Synonyms: ENSG00000167346; ENSP00000300762; ENSP00000369753; 56547; MMP26; NP\_068573; NM\_021801; endometase; MGC126590; MGC126592; MMP26\_HUMAN; Q9NRE1;

More at [Entrez](#)

MMP15 matrix metalloproteinase 15 (membrane-inserted) [Source:HGNC Symbol;Acc:7161] 2.15

Functions:

2  3  4  5  6  7  8  9

Synonyms: ENSG00000102996; ENSP00000219271; ENSP00000457084; 4324; MMP15; NP\_002419; NM\_002428; MT2-MMP; MTMMP2; SMCP-2; MMP15\_HUMAN; P51511;

More at [Entrez](#)

MMP2 matrix metalloproteinase 2 (gelatinase A, 72kDa gelatinase, 72kDa type IV collagenase) [Source:HGNC Syrn 2.10

Functions:

2  3  4  5  6  7  8  9   11

Synonyms: ENSG00000087245; ENSP00000219070; ENSP00000394237; ENSP00000444143; ENSP00000456096; ENSP00000456518; ENSP00000457949; ENSP00000461421; ENSP00000461915; 4313; MMP2; NP\_001121363; NP\_004521; NM\_001127891; NM\_004530; CLG4; CLG4A; TBE-1; MMP2\_HUMAN; P08253;

More at [Entrez](#)



## Functions

| Function                                                   | FDR      | Coverage |
|------------------------------------------------------------|----------|----------|
| 1 query genes                                              | n/a      | 8 / 8    |
| 2 collagen catabolic process                               | 3.96E-24 | 14 / 65  |
| 3 multicellular organismal catabolic process               | 7.78E-24 | 14 / 71  |
| 4 extracellular matrix disassembly                         | 6.3E-23  | 15 / 119 |
| 5 collagen metabolic process                               | 7.26E-23 | 14 / 86  |
| 6 multicellular organismal macromolecule metabolic process | 1.15E-22 | 14 / 90  |
| 7 multicellular organismal metabolic process               | 2.54E-22 | 14 / 96  |
| 8 extracellular matrix organization                        | 2.46E-17 | 15 / 290 |
| 9 extracellular structure organization                     | 2.46E-17 | 15 / 291 |
| 10 metalloendopeptidase activity                           | 1.3E-4   | 4 / 27   |
| 11 endopeptidase activity                                  | 2.05E-4  | 6 / 163  |
| 12 metallopeptidase activity                               | 9.09E-3  | 4 / 80   |
| 13 extracellular matrix                                    | 1.78E-2  | 5 / 208  |
| 14 proteinaceous extracellular matrix                      | 2.72E-2  | 4 / 110  |

## Interactions

| Gene 1 | Gene 2 | Weight               | Network group | Networks                                                                                                           |
|--------|--------|----------------------|---------------|--------------------------------------------------------------------------------------------------------------------|
| MMP1   | MMP3   | 0.08315662806853652  | Co-expression | Arijs-Rutgeerts-2009<br>Bild-Nevins-2006 B<br>Boldrick-Relman-2002<br>Ramaswamy-Golub-2001                         |
| CSF1R  | MMP9   | 0.07780082011595368  | Co-expression | Alizadeh-Staudt-2000<br>Arijs-Rutgeerts-2009<br>Bild-Nevins-2006 B<br>Boldrick-Relman-2002<br>Ramaswamy-Golub-2001 |
| MMP12  | MMP1   | 0.06619915179908276  | Co-expression | Arijs-Rutgeerts-2009<br>Ramaswamy-Golub-2001                                                                       |
| MMP8   | MMP9   | 0.048001520335674286 | Co-expression | Arijs-Rutgeerts-2009<br>Burington-Shaughnessy-2008                                                                 |
| MMP1   | MMP10  | 0.046535199508070946 | Co-expression | Arijs-Rutgeerts-2009<br>Ramaswamy-Golub-2001                                                                       |
| MMP12  | MMP3   | 0.043236750178039074 | Co-expression | Arijs-Rutgeerts-2009<br>Boldrick-Relman-2002<br>Ramaswamy-Golub-2001                                               |
| MMP17  | ABL1   | 0.039785776287317276 | Co-expression | Alizadeh-Staudt-2000<br>Boldrick-Relman-2002                                                                       |
| ABL1   | CDK9   | 0.039413267746567726 | Co-expression | Alizadeh-Staudt-2000<br>Bahr-Bowler-2013                                                                           |
| MMP1   | MMP27  | 0.03739033732563257  | Co-expression | Chen-Brown-2002<br>Smirnov-Cheung-2009                                                                             |
| MMP1   | MMP9   | 0.035868809558451176 | Co-expression | Alizadeh-Staudt-2000<br>Arijs-Rutgeerts-2009<br>Chen-Brown-2002                                                    |
| MMP7   | MMP12  | 0.03300734143704176  | Co-expression | Bild-Nevins-2006 B<br>Ramaswamy-Golub-2001                                                                         |
| MMP12  | MMP9   | 0.03089035488665104  | Co-expression | Arijs-Rutgeerts-2009<br>Chen-Brown-2002                                                                            |
| SRC    | MMP13  | 0.02658381685614586  | Co-expression | Burington-Shaughnessy-2008                                                                                         |
| MMP7   | MMP3   | 0.02531757391989231  | Co-expression | Alizadeh-Staudt-2000                                                                                               |
| MMP10  | MMP8   | 0.02511771209537983  | Co-expression | Arijs-Rutgeerts-2009                                                                                               |
| ABL1   | CSF1R  | 0.024075699038803577 | Co-expression | Chen-Brown-2002<br>Perou-Botstein-1999                                                                             |
| MMP14  | MMP3   | 0.02110777236521244  | Co-expression | Alizadeh-Staudt-2000                                                                                               |
| MMP8   | MMP13  | 0.021025409922003746 | Co-expression | Arijs-Rutgeerts-2009                                                                                               |
| MMP1   | MMP8   | 0.020457519218325615 | Co-expression | Arijs-Rutgeerts-2009                                                                                               |
| MMP17  | CDK9   | 0.020025674253702164 | Co-expression | Alizadeh-Staudt-2000                                                                                               |
| MMP12  | MMP10  | 0.019088277593255043 | Co-expression | Arijs-Rutgeerts-2009                                                                                               |
| MMP14  | ABL1   | 0.018521782010793686 | Co-expression | Bild-Nevins-2006 B                                                                                                 |
| MMP12  | MMP8   | 0.017592325806617737 | Co-expression | Arijs-Rutgeerts-2009                                                                                               |
| MMP10  | MMP9   | 0.016696784645318985 | Co-expression | Arijs-Rutgeerts-2009                                                                                               |
| MMP14  | MMP13  | 0.016678461804986    | Co-expression | Perou-Botstein-1999                                                                                                |
| MMP10  | MMP13  | 0.015926940366625786 | Co-expression | Ramaswamy-Golub-2001                                                                                               |
| MMP11  | MMP1   | 0.01591363735496998  | Co-expression | Bild-Nevins-2006 B                                                                                                 |
| MMP7   | MMP10  | 0.015549114905297756 | Co-expression | Arijs-Rutgeerts-2009                                                                                               |
| MMP11  | MMP14  | 0.015414537861943245 | Co-expression | Bild-Nevins-2006 B                                                                                                 |
| MMP8   | MMP3   | 0.01430840790271759  | Co-expression | Arijs-Rutgeerts-2009                                                                                               |
| MMP11  | MMP7   | 0.01417256984859705  | Co-expression | Ramaswamy-Golub-2001                                                                                               |
| MMP10  | MMP3   | 0.0137209203094244   | Co-expression | Arijs-Rutgeerts-2009                                                                                               |
| MMP2   | MMP7   | 0.013622893951833248 | Co-expression | Perou-Botstein-1999                                                                                                |
| MMP2   | MMP1   | 0.012175364419817924 | Co-expression | Alizadeh-Staudt-2000                                                                                               |
| MMP15  | MMP9   | 0.01169783086515963  | Co-expression | Alizadeh-Staudt-2000<br>Smirnov-Cheung-2009                                                                        |
| MMP11  | MMP10  | 0.011331639252603054 | Co-expression | Bild-Nevins-2006 B                                                                                                 |

|       |       |                       |                        |                                                |
|-------|-------|-----------------------|------------------------|------------------------------------------------|
| MMP15 | MMP28 | 0.01097777672111988   | Co-expression          | Smirnov-Cheung-2009                            |
| MMP2  | MMP25 | 0.010518291965126991  | Co-expression          | Burington-Shaughnessy-2008                     |
| MMP2  | MMP3  | 0.0100712226703763    | Co-expression          | Bild-Nevins-2006 B                             |
| MMP2  | MMP11 | 0.009795740246772766  | Co-expression          | Bild-Nevins-2006 B                             |
| MMP19 | MMP13 | 0.009640984237194061  | Co-expression          | Burington-Shaughnessy-2008                     |
| MMP17 | ESR1  | 0.009530636481940746  | Co-expression          | Perou-Botstein-1999                            |
| MMP9  | MMP3  | 0.009068215265870094  | Co-expression          | Arijs-Rutgeerts-2009                           |
| MMP2  | MMP15 | 0.009007873013615608  | Co-expression          | Alizadeh-Staudt-2000                           |
| MMP14 | MMP9  | 0.00881821196526289   | Co-expression          | Smirnov-Cheung-2009                            |
| MMP2  | ESR1  | 0.008663809858262539  | Co-expression          | Alizadeh-Staudt-2000                           |
| MMP15 | MMP17 | 0.008392536081373692  | Co-expression          | Perou-Botstein-1999                            |
| MMP25 | SRC   | 0.008341304957866669  | Co-expression          | Bild-Nevins-2006 B                             |
| MMP15 | MMP25 | 0.007599165663123131  | Co-expression          | Bild-Nevins-2006 B                             |
| MMP15 | ESR1  | 0.006821854971349239  | Co-expression          | Perou-Botstein-1999                            |
| MMP2  | CSF1R | 0.0067098094150424    | Co-expression          | Alizadeh-Staudt-2000                           |
| MMP2  | MMP9  | 0.006450654938817024  | Co-expression          | Alizadeh-Staudt-2000                           |
| MMP11 | MMP20 | 0.006288273259997368  | Co-expression          | Burington-Shaughnessy-2008                     |
| ABL1  | SRC   | 0.005723239853978157  | Co-expression          | Smirnov-Cheung-2009                            |
| MMP26 | MMP27 | 0.0031631295569241047 | Co-expression          | Arijs-Rutgeerts-2009                           |
| MMP11 | MMP24 | 0.002233868231996894  | Co-expression          | Burington-Shaughnessy-2008                     |
| MMP10 | MMP3  | 0.02944069728255272   | Co-localization        | Johnson-Shoemaker-2003                         |
| MMP10 | ESR1  | 0.02022220380604267   | Co-localization        | Johnson-Shoemaker-2003                         |
| ESR1  | MMP3  | 0.01997765526175499   | Co-localization        | Johnson-Shoemaker-2003                         |
| MMP7  | ESR1  | 0.014174806885421276  | Co-localization        | Johnson-Shoemaker-2003                         |
| MMP24 | MMP16 | 0.012489370070397854  | Co-localization        | Johnson-Shoemaker-2003                         |
| MMP8  | MMP9  | 0.01098998636007309   | Co-localization        | Johnson-Shoemaker-2003                         |
| MMP14 | MMP19 | 0.009298608638346195  | Co-localization        | Johnson-Shoemaker-2003                         |
| MMP14 | SRC   | 0.007836904376745224  | Co-localization        | Johnson-Shoemaker-2003                         |
| MMP14 | MMP3  | 0.00761366356164217   | Co-localization        | Johnson-Shoemaker-2003                         |
| MMP2  | SRC   | 0.00693303719162941   | Co-localization        | Johnson-Shoemaker-2003                         |
| MMP14 | MMP10 | 0.00656958157196641   | Co-localization        | Johnson-Shoemaker-2003                         |
| MMP7  | MMP14 | 0.0065179262310266495 | Co-localization        | Johnson-Shoemaker-2003                         |
| MMP2  | MMP3  | 0.006387967616319656  | Co-localization        | Johnson-Shoemaker-2003                         |
| MMP2  | MMP7  | 0.005242008715867996  | Co-localization        | Johnson-Shoemaker-2003                         |
| MMP2  | ESR1  | 0.005118488799780607  | Co-localization        | Johnson-Shoemaker-2003                         |
| MMP2  | MMP14 | 0.0035257197450846434 | Co-localization        | Johnson-Shoemaker-2003                         |
| MMP7  | MMP3  | 0.10168006271123886   | Pathway                | Wu-Stein-2010                                  |
| MMP2  | MMP14 | 0.02908765897154808   | Pathway                | Wu-Stein-2010                                  |
| MMP2  | SRC   | 0.027302810922265053  | Pathway                | PATHWAYCOMMONS-<br>NCI_NATURE<br>Wu-Stein-2010 |
| MMP9  | SRC   | 0.026412139181047678  | Pathway                | PATHWAYCOMMONS-<br>NCI_NATURE<br>Wu-Stein-2010 |
| ESR1  | SRC   | 0.0069710928946733475 | Pathway                | PATHWAYCOMMONS-<br>NCI_NATURE<br>Wu-Stein-2010 |
| ABL1  | SRC   | 0.006119976751506329  | Pathway                | Wu-Stein-2010                                  |
| ESR1  | SRC   | 0.0397075938526541    | Physical interactions  | IREF-BIOGRID<br>IREF-DIP<br>IREF-INTACT        |
| CSF1R | SRC   | 0.03715650178492069   | Physical interactions  | IREF-BIOGRID<br>IREF-INTACT                    |
| ABL1  | SRC   | 0.03036228520795703   | Physical interactions  | IREF-BIND<br>IREF-BIOGRID<br>IREF-INTACT       |
| MMP24 | MMP16 | 0.11205314472317696   | Shared protein domains | INTERPRO<br>PFAM                               |
| MMP14 | MMP16 | 0.11205314472317696   | Shared protein domains | INTERPRO                                       |

|       |       |                     |                        | PFAM             |
|-------|-------|---------------------|------------------------|------------------|
| MMP14 | MMP24 | 0.11205314472317696 | Shared protein domains | INTERPRO<br>PFAM |
| MMP15 | MMP16 | 0.10263661295175552 | Shared protein domains | INTERPRO<br>PFAM |
| MMP15 | MMP24 | 0.10263661295175552 | Shared protein domains | INTERPRO<br>PFAM |
| MMP15 | MMP14 | 0.10263661295175552 | Shared protein domains | INTERPRO<br>PFAM |
| MMP26 | MMP7  | 0.09782937541604042 | Shared protein domains | INTERPRO<br>PFAM |
| MMP17 | MMP20 | 0.08680696785449982 | Shared protein domains | INTERPRO<br>PFAM |
| MMP19 | MMP20 | 0.08680696785449982 | Shared protein domains | INTERPRO<br>PFAM |
| MMP19 | MMP17 | 0.08680696785449982 | Shared protein domains | INTERPRO<br>PFAM |
| MMP25 | MMP20 | 0.08679590746760368 | Shared protein domains | INTERPRO<br>PFAM |
| MMP17 | MMP25 | 0.08679590746760368 | Shared protein domains | INTERPRO<br>PFAM |
| MMP19 | MMP25 | 0.08679590746760368 | Shared protein domains | INTERPRO<br>PFAM |
| MMP20 | MMP13 | 0.08678418025374413 | Shared protein domains | INTERPRO<br>PFAM |
| MMP17 | MMP13 | 0.08678418025374413 | Shared protein domains | INTERPRO<br>PFAM |
| MMP19 | MMP13 | 0.08678418025374413 | Shared protein domains | INTERPRO<br>PFAM |
| MMP25 | MMP13 | 0.08677312359213829 | Shared protein domains | INTERPRO<br>PFAM |
| MMP12 | MMP20 | 0.08663327991962433 | Shared protein domains | INTERPRO<br>PFAM |
| MMP12 | MMP17 | 0.08663327991962433 | Shared protein domains | INTERPRO<br>PFAM |
| MMP12 | MMP19 | 0.08663327991962433 | Shared protein domains | INTERPRO<br>PFAM |
| MMP12 | MMP25 | 0.08662226796150208 | Shared protein domains | INTERPRO<br>PFAM |
| MMP12 | MMP13 | 0.0866105854511261  | Shared protein domains | INTERPRO<br>PFAM |
| MMP20 | MMP27 | 0.08649903163313866 | Shared protein domains | INTERPRO<br>PFAM |
| MMP17 | MMP27 | 0.08649903163313866 | Shared protein domains | INTERPRO<br>PFAM |
| MMP19 | MMP27 | 0.08649903163313866 | Shared protein domains | INTERPRO<br>PFAM |
| MMP25 | MMP27 | 0.08648804947733879 | Shared protein domains | INTERPRO<br>PFAM |
| MMP27 | MMP13 | 0.0864764079451561  | Shared protein domains | INTERPRO<br>PFAM |
| MMP20 | MMP21 | 0.08641837537288666 | Shared protein domains | INTERPRO<br>PFAM |
| MMP17 | MMP21 | 0.08641837537288666 | Shared protein domains | INTERPRO<br>PFAM |
| MMP19 | MMP21 | 0.08641837537288666 | Shared protein domains | INTERPRO<br>PFAM |
| MMP25 | MMP21 | 0.08640741556882858 | Shared protein domains | INTERPRO<br>PFAM |
| MMP21 | MMP13 | 0.08639579266309738 | Shared protein domains | INTERPRO<br>PFAM |
| MMP20 | MMP3  | 0.08634748309850693 | Shared protein domains | INTERPRO         |

|       |       |                     |                        | PFAM             |
|-------|-------|---------------------|------------------------|------------------|
| MMP17 | MMP3  | 0.08634748309850693 | Shared protein domains | INTERPRO<br>PFAM |
| MMP19 | MMP3  | 0.08634748309850693 | Shared protein domains | INTERPRO<br>PFAM |
| MMP20 | MMP8  | 0.08633934706449509 | Shared protein domains | INTERPRO<br>PFAM |
| MMP17 | MMP8  | 0.08633934706449509 | Shared protein domains | INTERPRO<br>PFAM |
| MMP19 | MMP8  | 0.08633934706449509 | Shared protein domains | INTERPRO<br>PFAM |
| MMP25 | MMP3  | 0.08633654192090034 | Shared protein domains | INTERPRO<br>PFAM |
| MMP25 | MMP8  | 0.0863284096121788  | Shared protein domains | INTERPRO<br>PFAM |
| MMP12 | MMP27 | 0.08632660284638405 | Shared protein domains | INTERPRO<br>PFAM |
| MMP3  | MMP13 | 0.08632494136691093 | Shared protein domains | INTERPRO<br>PFAM |
| MMP8  | MMP13 | 0.08631680905818939 | Shared protein domains | INTERPRO<br>PFAM |
| MMP1  | MMP20 | 0.08628861606121063 | Shared protein domains | INTERPRO<br>PFAM |
| MMP1  | MMP17 | 0.08628861606121063 | Shared protein domains | INTERPRO<br>PFAM |
| MMP1  | MMP19 | 0.08628861606121063 | Shared protein domains | INTERPRO<br>PFAM |
| MMP1  | MMP25 | 0.08627768978476524 | Shared protein domains | INTERPRO<br>PFAM |
| MMP1  | MMP13 | 0.08626610413193703 | Shared protein domains | INTERPRO<br>PFAM |
| MMP12 | MMP21 | 0.08624627441167831 | Shared protein domains | INTERPRO<br>PFAM |
| MMP12 | MMP3  | 0.08617567270994186 | Shared protein domains | INTERPRO<br>PFAM |
| MMP12 | MMP8  | 0.08616757020354271 | Shared protein domains | INTERPRO<br>PFAM |
| MMP12 | MMP1  | 0.08611704409122467 | Shared protein domains | INTERPRO<br>PFAM |
| MMP27 | MMP21 | 0.08611324802041054 | Shared protein domains | INTERPRO<br>PFAM |
| MMP27 | MMP3  | 0.086042869836092   | Shared protein domains | INTERPRO<br>PFAM |
| MMP8  | MMP27 | 0.08603479340672493 | Shared protein domains | INTERPRO<br>PFAM |
| MMP1  | MMP27 | 0.08598442748188972 | Shared protein domains | INTERPRO<br>PFAM |
| MMP21 | MMP3  | 0.08596308156847954 | Shared protein domains | INTERPRO<br>PFAM |
| MMP8  | MMP21 | 0.08595502376556396 | Shared protein domains | INTERPRO<br>PFAM |
| MMP1  | MMP21 | 0.08590475097298622 | Shared protein domains | INTERPRO<br>PFAM |
| MMP8  | MMP3  | 0.08588491007685661 | Shared protein domains | INTERPRO<br>PFAM |
| MMP1  | MMP3  | 0.08583472296595573 | Shared protein domains | INTERPRO<br>PFAM |
| MMP1  | MMP8  | 0.08582668751478195 | Shared protein domains | INTERPRO<br>PFAM |
| MMP10 | MMP20 | 0.08571403473615646 | Shared protein domains | INTERPRO<br>PFAM |
| MMP17 | MMP10 | 0.08571403473615646 | Shared protein domains | INTERPRO         |

|       |       |                     |                        | PFAM             |
|-------|-------|---------------------|------------------------|------------------|
| MMP19 | MMP10 | 0.08571403473615646 | Shared protein domains | INTERPRO<br>PFAM |
| MMP25 | MMP10 | 0.08570325374603271 | Shared protein domains | INTERPRO<br>PFAM |
| MMP10 | MMP13 | 0.08569182828068733 | Shared protein domains | INTERPRO<br>PFAM |
| MMP12 | MMP10 | 0.08554480597376823 | Shared protein domains | INTERPRO<br>PFAM |
| MMP10 | MMP27 | 0.08541399985551834 | Shared protein domains | INTERPRO<br>PFAM |
| MMP10 | MMP21 | 0.08533541485667229 | Shared protein domains | INTERPRO<br>PFAM |
| MMP10 | MMP3  | 0.0852663442492485  | Shared protein domains | INTERPRO<br>PFAM |
| MMP10 | MMP8  | 0.08525841683149338 | Shared protein domains | INTERPRO<br>PFAM |
| MMP1  | MMP10 | 0.08520898595452309 | Shared protein domains | INTERPRO<br>PFAM |
| MMP16 | MMP20 | 0.0835627056658268  | Shared protein domains | INTERPRO<br>PFAM |
| MMP16 | MMP17 | 0.0835627056658268  | Shared protein domains | INTERPRO<br>PFAM |
| MMP16 | MMP19 | 0.0835627056658268  | Shared protein domains | INTERPRO<br>PFAM |
| MMP24 | MMP20 | 0.0835627056658268  | Shared protein domains | INTERPRO<br>PFAM |
| MMP24 | MMP17 | 0.0835627056658268  | Shared protein domains | INTERPRO<br>PFAM |
| MMP24 | MMP19 | 0.0835627056658268  | Shared protein domains | INTERPRO<br>PFAM |
| MMP14 | MMP20 | 0.0835627056658268  | Shared protein domains | INTERPRO<br>PFAM |
| MMP14 | MMP17 | 0.0835627056658268  | Shared protein domains | INTERPRO<br>PFAM |
| MMP14 | MMP19 | 0.0835627056658268  | Shared protein domains | INTERPRO<br>PFAM |
| MMP16 | MMP25 | 0.08355189487338066 | Shared protein domains | INTERPRO<br>PFAM |
| MMP24 | MMP25 | 0.08355189487338066 | Shared protein domains | INTERPRO<br>PFAM |
| MMP14 | MMP25 | 0.08355189487338066 | Shared protein domains | INTERPRO<br>PFAM |
| MMP16 | MMP13 | 0.083540428429842   | Shared protein domains | INTERPRO<br>PFAM |
| MMP24 | MMP13 | 0.083540428429842   | Shared protein domains | INTERPRO<br>PFAM |
| MMP14 | MMP13 | 0.083540428429842   | Shared protein domains | INTERPRO<br>PFAM |
| MMP12 | MMP16 | 0.0833929292857647  | Shared protein domains | INTERPRO<br>PFAM |
| MMP24 | MMP12 | 0.0833929292857647  | Shared protein domains | INTERPRO<br>PFAM |
| MMP14 | MMP12 | 0.0833929292857647  | Shared protein domains | INTERPRO<br>PFAM |
| MMP16 | MMP27 | 0.08326169848442078 | Shared protein domains | INTERPRO<br>PFAM |
| MMP24 | MMP27 | 0.08326169848442078 | Shared protein domains | INTERPRO<br>PFAM |
| MMP14 | MMP27 | 0.08326169848442078 | Shared protein domains | INTERPRO<br>PFAM |
| MMP16 | MMP21 | 0.08318285644054413 | Shared protein domains | INTERPRO         |

|       |       |                     |                        | PFAM             |
|-------|-------|---------------------|------------------------|------------------|
| MMP24 | MMP21 | 0.08318285644054413 | Shared protein domains | INTERPRO<br>PFAM |
| MMP14 | MMP21 | 0.08318285644054413 | Shared protein domains | INTERPRO<br>PFAM |
| MMP16 | MMP3  | 0.08311356231570244 | Shared protein domains | INTERPRO<br>PFAM |
| MMP24 | MMP3  | 0.08311356231570244 | Shared protein domains | INTERPRO<br>PFAM |
| MMP14 | MMP3  | 0.08311356231570244 | Shared protein domains | INTERPRO<br>PFAM |
| MMP16 | MMP8  | 0.08310561254620552 | Shared protein domains | INTERPRO<br>PFAM |
| MMP24 | MMP8  | 0.08310561254620552 | Shared protein domains | INTERPRO<br>PFAM |
| MMP14 | MMP8  | 0.08310561254620552 | Shared protein domains | INTERPRO<br>PFAM |
| MMP1  | MMP16 | 0.0830560214817524  | Shared protein domains | INTERPRO<br>PFAM |
| MMP24 | MMP1  | 0.0830560214817524  | Shared protein domains | INTERPRO<br>PFAM |
| MMP14 | MMP1  | 0.0830560214817524  | Shared protein domains | INTERPRO<br>PFAM |
| MMP2  | MMP9  | 0.08281752467155457 | Shared protein domains | INTERPRO<br>PFAM |
| MMP16 | MMP10 | 0.08249437436461449 | Shared protein domains | INTERPRO<br>PFAM |
| MMP24 | MMP10 | 0.08249437436461449 | Shared protein domains | INTERPRO<br>PFAM |
| MMP14 | MMP10 | 0.08249437436461449 | Shared protein domains | INTERPRO<br>PFAM |
| MMP20 | MMP28 | 0.08162881433963776 | Shared protein domains | INTERPRO<br>PFAM |
| MMP17 | MMP28 | 0.08162881433963776 | Shared protein domains | INTERPRO<br>PFAM |
| MMP19 | MMP28 | 0.08162881433963776 | Shared protein domains | INTERPRO<br>PFAM |
| MMP25 | MMP28 | 0.08161871135234833 | Shared protein domains | INTERPRO<br>PFAM |
| MMP28 | MMP13 | 0.08160799741744995 | Shared protein domains | INTERPRO<br>PFAM |
| MMP12 | MMP28 | 0.08147017657756805 | Shared protein domains | INTERPRO<br>PFAM |
| MMP27 | MMP28 | 0.08134755864739418 | Shared protein domains | INTERPRO<br>PFAM |
| MMP28 | MMP21 | 0.0812738947570324  | Shared protein domains | INTERPRO<br>PFAM |
| MMP28 | MMP3  | 0.08120914548635483 | Shared protein domains | INTERPRO<br>PFAM |
| MMP8  | MMP28 | 0.0812017135322094  | Shared protein domains | INTERPRO<br>PFAM |
| MMP1  | MMP28 | 0.08115537837147713 | Shared protein domains | INTERPRO<br>PFAM |
| MMP10 | MMP28 | 0.0806305892765522  | Shared protein domains | INTERPRO<br>PFAM |
| MMP16 | MMP28 | 0.07854435965418816 | Shared protein domains | INTERPRO<br>PFAM |
| MMP24 | MMP28 | 0.07854435965418816 | Shared protein domains | INTERPRO<br>PFAM |
| MMP14 | MMP28 | 0.07854435965418816 | Shared protein domains | INTERPRO<br>PFAM |
| MMP11 | MMP20 | 0.07805588468909264 | Shared protein domains | INTERPRO<br>PFAM |

|       |       |                     |                        |                  |
|-------|-------|---------------------|------------------------|------------------|
| MMP11 | MMP17 | 0.07805588468909264 | Shared protein domains | INTERPRO<br>PFAM |
| MMP11 | MMP19 | 0.07805588468909264 | Shared protein domains | INTERPRO<br>PFAM |
| MMP11 | MMP25 | 0.07804539054632187 | Shared protein domains | INTERPRO<br>PFAM |
| MMP11 | MMP13 | 0.07803426682949066 | Shared protein domains | INTERPRO<br>PFAM |
| MMP11 | MMP12 | 0.07789112254977226 | Shared protein domains | INTERPRO<br>PFAM |
| MMP11 | MMP27 | 0.07776376977562904 | Shared protein domains | INTERPRO<br>PFAM |
| MMP11 | MMP21 | 0.07768725603818893 | Shared protein domains | INTERPRO<br>PFAM |
| MMP11 | MMP3  | 0.0776200033724308  | Shared protein domains | INTERPRO<br>PFAM |
| MMP11 | MMP8  | 0.07761228829622269 | Shared protein domains | INTERPRO<br>PFAM |
| MMP11 | MMP1  | 0.07756416127085686 | Shared protein domains | INTERPRO<br>PFAM |
| MMP7  | MMP20 | 0.07719079032540321 | Shared protein domains | INTERPRO<br>PFAM |
| MMP7  | MMP17 | 0.07719079032540321 | Shared protein domains | INTERPRO<br>PFAM |
| MMP7  | MMP19 | 0.07719079032540321 | Shared protein domains | INTERPRO<br>PFAM |
| MMP7  | MMP25 | 0.07718152925372124 | Shared protein domains | INTERPRO<br>PFAM |
| MMP7  | MMP13 | 0.0771716982126236  | Shared protein domains | INTERPRO<br>PFAM |
| MMP7  | MMP12 | 0.07704530656337738 | Shared protein domains | INTERPRO<br>PFAM |
| MMP11 | MMP10 | 0.077019102871418   | Shared protein domains | INTERPRO<br>PFAM |
| MMP7  | MMP27 | 0.07693285122513771 | Shared protein domains | INTERPRO<br>PFAM |
| MMP7  | MMP21 | 0.0768652856349945  | Shared protein domains | INTERPRO<br>PFAM |
| MMP7  | MMP3  | 0.07680590450763702 | Shared protein domains | INTERPRO<br>PFAM |
| MMP7  | MMP8  | 0.07679909467697144 | Shared protein domains | INTERPRO<br>PFAM |
| MMP7  | MMP1  | 0.07675659656524658 | Shared protein domains | INTERPRO<br>PFAM |
| MMP15 | MMP20 | 0.07667861878871918 | Shared protein domains | INTERPRO<br>PFAM |
| MMP15 | MMP17 | 0.07667861878871918 | Shared protein domains | INTERPRO<br>PFAM |
| MMP15 | MMP19 | 0.07667861878871918 | Shared protein domains | INTERPRO<br>PFAM |
| MMP15 | MMP25 | 0.07666851952672005 | Shared protein domains | INTERPRO<br>PFAM |
| MMP15 | MMP13 | 0.07665780559182167 | Shared protein domains | INTERPRO<br>PFAM |
| MMP15 | MMP12 | 0.07651997357606888 | Shared protein domains | INTERPRO<br>PFAM |
| MMP15 | MMP27 | 0.07639734819531441 | Shared protein domains | INTERPRO<br>PFAM |
| MMP15 | MMP21 | 0.07632367685437202 | Shared protein domains | INTERPRO<br>PFAM |
| MMP7  | MMP10 | 0.0762753002345562  | Shared protein domains | INTERPRO<br>PFAM |



|            |            |                     |                        |                  |
|------------|------------|---------------------|------------------------|------------------|
| MMP15      | MMP3       | 0.07625892385840416 | Shared protein domains | INTERPRO<br>PFAM |
| MMP15      | MMP8       | 0.07625149190425873 | Shared protein domains | INTERPRO<br>PFAM |
| MMP15      | MMP1       | 0.07620515301823616 | Shared protein domains | INTERPRO<br>PFAM |
| MMP15      | MMP10      | 0.07568032294511795 | Shared protein domains | INTERPRO<br>PFAM |
| MMP11      | MMP16      | 0.07519971951842308 | Shared protein domains | INTERPRO<br>PFAM |
| MMP11      | MMP24      | 0.07519971951842308 | Shared protein domains | INTERPRO<br>PFAM |
| MMP11      | MMP14      | 0.07519971951842308 | Shared protein domains | INTERPRO<br>PFAM |
| CTB-96E2.2 | MMP28      | 0.0751018114387989  | Shared protein domains | INTERPRO<br>PFAM |
| MMP11      | CTB-96E2.2 | 0.07482390105724335 | Shared protein domains | INTERPRO<br>PFAM |
| MMP7       | MMP16      | 0.07424148172140121 | Shared protein domains | INTERPRO<br>PFAM |
| MMP7       | MMP24      | 0.07424148172140121 | Shared protein domains | INTERPRO<br>PFAM |
| MMP7       | MMP14      | 0.07424148172140121 | Shared protein domains | INTERPRO<br>PFAM |
| MMP15      | MMP28      | 0.07203641533851624 | Shared protein domains | INTERPRO<br>PFAM |
| MMP26      | MMP11      | 0.07163614593446255 | Shared protein domains | INTERPRO<br>PFAM |
| MMP20      | MMP9       | 0.06948774307966232 | Shared protein domains | INTERPRO<br>PFAM |
| MMP17      | MMP9       | 0.06948774307966232 | Shared protein domains | INTERPRO<br>PFAM |
| MMP19      | MMP9       | 0.06948774307966232 | Shared protein domains | INTERPRO<br>PFAM |
| MMP2       | MMP20      | 0.06948769092559814 | Shared protein domains | INTERPRO<br>PFAM |
| MMP2       | MMP17      | 0.06948769092559814 | Shared protein domains | INTERPRO<br>PFAM |
| MMP2       | MMP19      | 0.06948769092559814 | Shared protein domains | INTERPRO<br>PFAM |
| MMP25      | MMP9       | 0.06947918981313705 | Shared protein domains | INTERPRO<br>PFAM |
| MMP2       | MMP25      | 0.06947914138436317 | Shared protein domains | INTERPRO<br>PFAM |
| MMP9       | MMP13      | 0.0694701261818409  | Shared protein domains | INTERPRO<br>PFAM |
| MMP2       | MMP13      | 0.06947007402777672 | Shared protein domains | INTERPRO<br>PFAM |
| MMP12      | MMP9       | 0.06935350596904755 | Shared protein domains | INTERPRO<br>PFAM |
| MMP2       | MMP12      | 0.06935345754027367 | Shared protein domains | INTERPRO<br>PFAM |
| MMP27      | MMP9       | 0.06924974918365479 | Shared protein domains | INTERPRO<br>PFAM |
| MMP2       | MMP27      | 0.0692497007548809  | Shared protein domains | INTERPRO<br>PFAM |
| MMP21      | MMP9       | 0.06918741390109062 | Shared protein domains | INTERPRO<br>PFAM |
| MMP2       | MMP21      | 0.06918736174702644 | Shared protein domains | INTERPRO<br>PFAM |
| MMP9       | MMP3       | 0.06913262233138084 | Shared protein domains | INTERPRO<br>PFAM |

|       |       |                     |                        |                  |
|-------|-------|---------------------|------------------------|------------------|
| MMP2  | MMP3  | 0.06913257390260696 | Shared protein domains | INTERPRO<br>PFAM |
| MMP8  | MMP9  | 0.06912633776664734 | Shared protein domains | INTERPRO<br>PFAM |
| MMP2  | MMP8  | 0.06912628933787346 | Shared protein domains | INTERPRO<br>PFAM |
| MMP1  | MMP9  | 0.06908712908625603 | Shared protein domains | INTERPRO<br>PFAM |
| MMP2  | MMP1  | 0.06908708065748215 | Shared protein domains | INTERPRO<br>PFAM |
| MMP15 | MMP11 | 0.06907225027680397 | Shared protein domains | INTERPRO<br>PFAM |
| MMP10 | MMP9  | 0.06864306330680847 | Shared protein domains | INTERPRO<br>PFAM |
| MMP2  | MMP10 | 0.0686430111527443  | Shared protein domains | INTERPRO<br>PFAM |
| MMP26 | MMP20 | 0.06816204264760017 | Shared protein domains | INTERPRO<br>PFAM |
| MMP26 | MMP17 | 0.06816204264760017 | Shared protein domains | INTERPRO<br>PFAM |
| MMP26 | MMP19 | 0.06816204264760017 | Shared protein domains | INTERPRO<br>PFAM |
| MMP26 | MMP25 | 0.06815265864133835 | Shared protein domains | INTERPRO<br>PFAM |
| MMP26 | MMP13 | 0.06814270839095116 | Shared protein domains | INTERPRO<br>PFAM |
| MMP15 | MMP7  | 0.06805405765771866 | Shared protein domains | INTERPRO<br>PFAM |
| MMP26 | MMP12 | 0.06801469251513481 | Shared protein domains | INTERPRO<br>PFAM |
| MMP26 | MMP27 | 0.06790079548954964 | Shared protein domains | INTERPRO<br>PFAM |
| MMP26 | MMP21 | 0.06783236563205719 | Shared protein domains | INTERPRO<br>PFAM |
| MMP26 | MMP3  | 0.06777221709489822 | Shared protein domains | INTERPRO<br>PFAM |
| MMP26 | MMP8  | 0.06776531785726547 | Shared protein domains | INTERPRO<br>PFAM |
| MMP26 | MMP1  | 0.06772227585315704 | Shared protein domains | INTERPRO<br>PFAM |
| MMP26 | MMP10 | 0.06723480299115181 | Shared protein domains | INTERPRO<br>PFAM |
| MMP28 | MMP9  | 0.06704460456967354 | Shared protein domains | INTERPRO<br>PFAM |
| MMP2  | MMP28 | 0.06704459711909294 | Shared protein domains | INTERPRO<br>PFAM |
| MMP2  | MMP7  | 0.06695974990725517 | Shared protein domains | INTERPRO<br>PFAM |
| MMP7  | MMP9  | 0.06695970147848129 | Shared protein domains | INTERPRO<br>PFAM |
| MMP11 | MMP28 | 0.06691209971904755 | Shared protein domains | INTERPRO<br>PFAM |
| MMP16 | MMP9  | 0.06685641780495644 | Shared protein domains | INTERPRO<br>PFAM |
| MMP24 | MMP9  | 0.06685641780495644 | Shared protein domains | INTERPRO<br>PFAM |
| MMP14 | MMP9  | 0.06685641780495644 | Shared protein domains | INTERPRO<br>PFAM |
| MMP2  | MMP16 | 0.06685636937618256 | Shared protein domains | INTERPRO<br>PFAM |
| MMP2  | MMP24 | 0.06685636937618256 | Shared protein domains | INTERPRO<br>PFAM |

|            |            |                      |                        |                  |
|------------|------------|----------------------|------------------------|------------------|
| MMP2       | MMP14      | 0.06685636937618256  | Shared protein domains | INTERPRO<br>PFAM |
| MMP26      | MMP16      | 0.065691988915205    | Shared protein domains | INTERPRO<br>PFAM |
| MMP26      | MMP24      | 0.065691988915205    | Shared protein domains | INTERPRO<br>PFAM |
| MMP26      | MMP14      | 0.065691988915205    | Shared protein domains | INTERPRO<br>PFAM |
| MMP7       | MMP28      | 0.06513834558427334  | Shared protein domains | INTERPRO<br>PFAM |
| CTB-96E2.2 | MMP20      | 0.06170181185007095  | Shared protein domains | INTERPRO<br>PFAM |
| CTB-96E2.2 | MMP17      | 0.06170181185007095  | Shared protein domains | INTERPRO<br>PFAM |
| CTB-96E2.2 | MMP19      | 0.06170181185007095  | Shared protein domains | INTERPRO<br>PFAM |
| CTB-96E2.2 | MMP25      | 0.061694083735346794 | Shared protein domains | INTERPRO<br>PFAM |
| CTB-96E2.2 | MMP13      | 0.06168588809669018  | Shared protein domains | INTERPRO<br>PFAM |
| CTB-96E2.2 | MMP12      | 0.06158047541975975  | Shared protein domains | INTERPRO<br>PFAM |
| CTB-96E2.2 | MMP27      | 0.06148669123649597  | Shared protein domains | INTERPRO<br>PFAM |
| CTB-96E2.2 | MMP21      | 0.061430344358086586 | Shared protein domains | INTERPRO<br>PFAM |
| MMP2       | MMP11      | 0.06138291954994202  | Shared protein domains | INTERPRO<br>PFAM |
| MMP11      | MMP9       | 0.06138289161026478  | Shared protein domains | INTERPRO<br>PFAM |
| CTB-96E2.2 | MMP3       | 0.06138082034885883  | Shared protein domains | INTERPRO<br>PFAM |
| CTB-96E2.2 | MMP8       | 0.06137513741850853  | Shared protein domains | INTERPRO<br>PFAM |
| CTB-96E2.2 | MMP1       | 0.06133969500660896  | Shared protein domains | INTERPRO<br>PFAM |
| MMP15      | MMP9       | 0.06131063774228096  | Shared protein domains | INTERPRO<br>PFAM |
| MMP2       | MMP15      | 0.06131059117615223  | Shared protein domains | INTERPRO<br>PFAM |
| CTB-96E2.2 | MMP10      | 0.06093830242753029  | Shared protein domains | INTERPRO<br>PFAM |
| MMP15      | MMP26      | 0.060366034507751465 | Shared protein domains | INTERPRO<br>PFAM |
| MMP2       | MMP26      | 0.05953052453696728  | Shared protein domains | INTERPRO<br>PFAM |
| MMP26      | MMP9       | 0.059530315920710564 | Shared protein domains | INTERPRO<br>PFAM |
| CTB-96E2.2 | MMP16      | 0.0593793373554945   | Shared protein domains | INTERPRO<br>PFAM |
| CTB-96E2.2 | MMP24      | 0.0593793373554945   | Shared protein domains | INTERPRO<br>PFAM |
| CTB-96E2.2 | MMP14      | 0.0593793373554945   | Shared protein domains | INTERPRO<br>PFAM |
| MMP11      | MMP7       | 0.05570451356470585  | Shared protein domains | INTERPRO<br>PFAM |
| MMP15      | CTB-96E2.2 | 0.05446958169341087  | Shared protein domains | INTERPRO<br>PFAM |
| MMP2       | CTB-96E2.2 | 0.053628357127308846 | Shared protein domains | INTERPRO<br>PFAM |
| CTB-96E2.2 | MMP9       | 0.05362806096673012  | Shared protein domains | INTERPRO<br>PFAM |

|       |       |                      |                        |                  |
|-------|-------|----------------------|------------------------|------------------|
| MMP26 | MMP28 | 0.047662071883678436 | Shared protein domains | INTERPRO<br>PFAM |
| ABL1  | SRC   | 0.03220065124332905  | Shared protein domains | INTERPRO<br>PFAM |
| CDK9  | CSF1R | 0.006974334828555584 | Shared protein domains | INTERPRO<br>PFAM |
| ABL1  | CDK9  | 0.003097539534792304 | Shared protein domains | INTERPRO         |
| CDK9  | SRC   | 0.003078958485275507 | Shared protein domains | INTERPRO         |

Search results generated by the GeneMANIA algorithm ([genemania.org](http://genemania.org))

# GENEMANIA

## Report of GeneMANIA search

### Network image

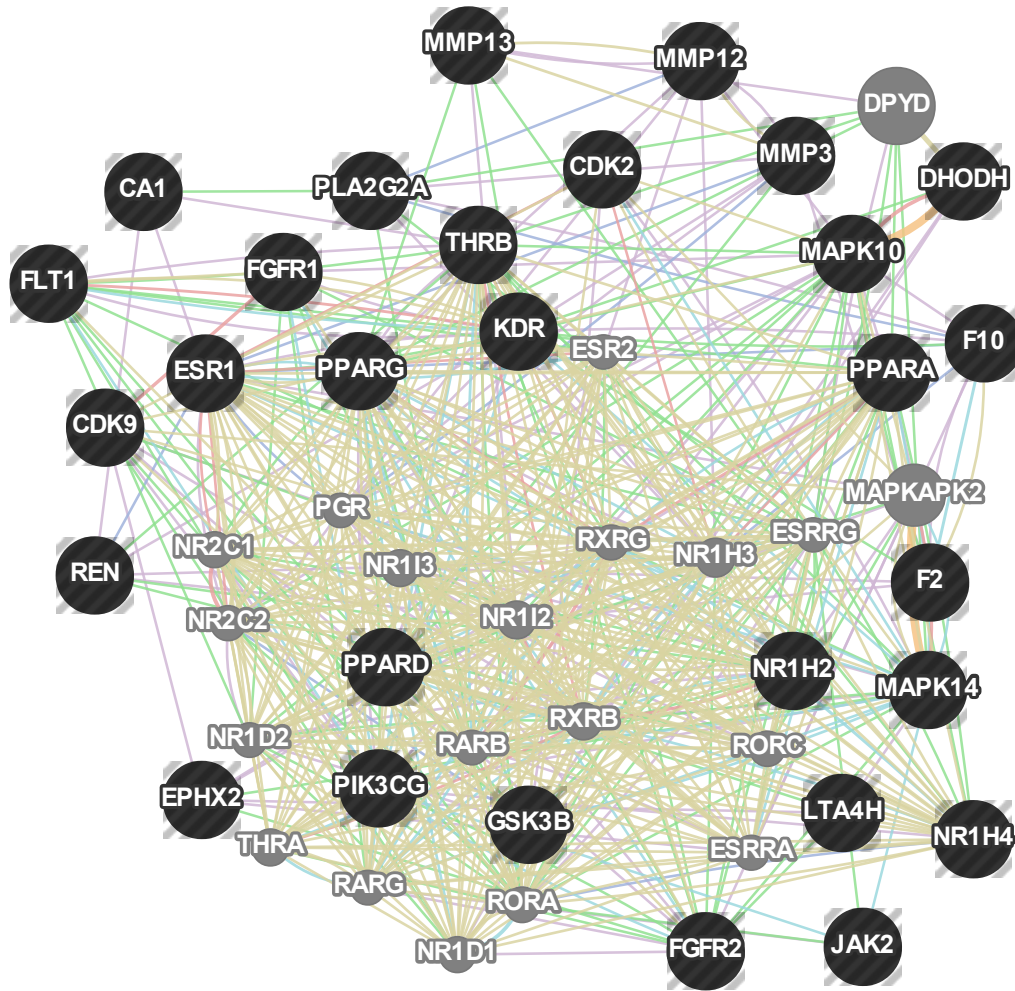

#### Functions legend

■ query genes

#### Networks legend

- Co-expression
- Co-localization
- Genetic interactions
- Pathway
- Physical interactions
- Predicted
- Shared protein domains

## Search parameters

Organism: *H. sapiens* (human)

Genes: Q96RI1; P21802; P11362; P49841; P03372; O60674; P17948; Q02127; P48736; P53779; P09960; Q03181; Q16539; P34913; P24941; P00742; P35968; P55055; P37231; P00915; P50750; P45452; P00797; P08254; P10828; P00734; Q07869; P14555; P39900

Networks:

### Attributes:

#### Co-expression:

Alizadeh-Staudt-2000 Arijs-Rutgeerts-2009 Bahr-Bowler-2013 Bild-Nevins-2006 B  
 Boldrick-Relman-2002 Burington-Shaughnessy-2008 Chen-Brown-2002 Cheok-Evans-2003  
 Gysin-McMahon-2012 Innocenti-Brown-2011 Kang-Willman-2010 Mallon-McKay-2013  
 Perou-Botstein-1999 Ramaswamy-Golub-2001 Rieger-Chu-2004 Roth-Zlotnik-2006  
 Salaverria-Siebert-2011 Smirnov-Cheung-2009 Wang-Maris-2006 Wu-Garvey-2007

#### Co-localization:

Johnson-Shoemaker-2003 Satoh-Yamamoto-2013 Schadt-Shoemaker-2004

#### Genetic interactions:

BIOGRID-SMALL-SCALE-STUDIES IREF-SMALL-SCALE-STUDIES Lin-Boeke-2012 A Lin-Boeke-2012 B  
 Lin-Smith-2010 Toyoshima-Grandori-2012 Willingham-Muchowski-2003

#### Pathway:

PATHWAYCOMMONS-CELL\_MAP PATHWAYCOMMONS-HUMANCYC PATHWAYCOMMONS-IMID  
 PATHWAYCOMMONS-NCI\_NATURE PATHWAYCOMMONS-REACTOME Wu-Stein-2010

#### Physical interactions:

Abu-Odeh-Aqeilan-2014 Agrawal-Sedivy-2010 Aichem-Groettrup-2012 Albers-Koegl-2005  
 Alexandru-Deshaies-2008 Altun-Kessler-2011 Andresen-Flores-Morales-2014 Arbuckle-Grant-2010  
 Arora-Mercola-2008 BIOGRID-SMALL-SCALE-STUDIES Bandyopadhyay-Ideker-2010  
 Bantscheff-Drewes-2011 Barr-Knapp-2009 Barrios-Rodriguez-Wrana-2005 Behrends-Harper-2010  
 Behzadnia-Lührmann-2007 Bennett-Harper-2010 Benzinger-Hermeking-2005 Berggård-James-2006  
 Bett-Hay-2013 Blandin-Richard-2013 Bouwmeester-Supert-Furga-2004 Brajenovic-Drewes-2004  
 Brehme-Supert-Furga-2009 Bruderer-Hay-2011 Byron-Humphries-2012 Cai-Conaway-2007  
 Camargo-Brandon-2007 Cannavo-Jiricny-2007 Cao-Chinnaiyan-2014 Chen-Ge-2013 Chen-Naus-2012  
 Chen-Zhang-2013 Cheng-Chen-2010 Cloutier-Coulombe-2013 Colland-Gauthier-2004  
 Couzens-Gingras-2013 Cox-Rizzino-2013 Danielsen-Nielsen-2011 Dyer-Sobral-2010  
 Emanuele-Elledge-2011 Ewing-Figeys-2007 Fenner-Prehn-2010 Foerster-Ritter-2013  
 Foster-Marshall-2013 Freibaum-Taylor-2010 Gao-Reinberg-2012 Gautier-Hall-2009 Giannone-Liu-2010  
 Glatter-Gstaiger-2009 Gloeckner-Ueffing-2007 Goehler-Wanker-2004 Golebiowski-Hay-2009  
 Goudreault-Gingras-2009 Grant-2010 Greco-Cristea-2011 Havrylov-Redowicz-2009  
 Havugimana-Emili-2012 Hayes-Urbé-2012 Hegele-Stelzl-2012 A Hegele-Stelzl-2012 B  
 Humphries-Humphries-2009 Hutchins-Peters-2010 IREF-BIND IREF-BIOGRID IREF-DIP IREF-HPRD  
 IREF-INNATEDB IREF-INTACT IREF-MATRIXDB IREF-MPPI IREF-OPHID IREF-PUBMED  
 IREF-SMALL-SCALE-STUDIES Ingham-Pawson-2005 Jeronimo-Coulombe-2007 Jin-Pawson-2004  
 Jones-MacBeath-2006 Joshi-Cristea-2013 Jäger-Krogan-2012 Kahle-Zoghbi-2011 Kim-Gygi-2011  
 Kneissl-Grummt-2003 Koch-Hermeking-2007 Kristensen-Foster-2012 Lau-Ronai-2012  
 Lee-Doedens-2011 Lee-Songyang-2011 Lehner-Sanderson-2004 A Lehner-Sanderson-2004 B  
 Leng-Wang-2014 Li-Dorf-2011 A Li-Dorf-2011 B Lim-Zoghbi-2006 Liu-Wang-2012  
 Loch-Strickler-2012 Lopitz-Otsoa-Rodriguez-2012 Lu-Zhang-2013 Mak-Moffat-2010  
 Malovannaya-Qin-2010 Markson-Sanderson-2009 Maréchal-Zou-2014 Matafora-Bachi-2009  
 Matsumoto-Nakayama-2005 McCracken-Blencowe-2005 McFarland-Nussbaum-2008  
 Meek-Piwnicka-Worms-2004 Meierhofer-Kaiser-2008 Miyamoto-Sato-Yanagawa-2010  
 Nakayama-Ohara-2002 Nakayasu-Adkins-2013 Napolitano-Meroni-2011 Nathan-Goldberg-2013  
 Neganova-Lako-2011 Newman-Keating-2003 Olma-Pintard-2009 Oláh-Ovádi-2011  
 Oshikawa-Nakayama-2012 Ouyang-Gill-2009 Panigrahi-Pati-2012 Perez-Hernandez-Yáñez-Mó-2013  
 Persaud-Rotin-2009 Pichlmair-Supert-Furga-2011 Pichlmair-Supert-Furga-2012 Pilot-Storck-Goillot-2010  
 Povlsen-Choudhary-2012 Ramachandran-LaBaer-2004 Ravasi-Hayashizaki-2010 Reinke-Keating-2013  
 Richter-Chrzanowska-Lightowlers-2010 Roux-Burke-2012 Rowbotham-Mermoud-2011 Roy-Parent-2013  
 Rual-Vidal-2005 A Rual-Vidal-2005 B San-Marina-Minden-2008 Sang-Jackson-2011  
 Sato-Conaway-2004 Shi-Qin-2011 Singh-Moore-2012 Soler-López-Aloy-2011 Sowa-Harper-2009  
 Stehling-Lill-2012 Stelzl-Wanker-2005 Suter-Wanker-2013 Taipale-Lindquist-2012  
 Takahashi-Conaway-2011 Tarallo-Weisz-2011 Tatham-Hay-2011 Teixeira-Gomes-2010  
 Thalappilly-Dusetti-2008 Tsai-Cristea-2012 Udeshi-Carr-2012 Vandamme-Angrand-2011  
 Vanderwerf-Bagby-2009 Varjosalo-Gstaiger-2013 A Varjosalo-Gstaiger-2013 B  
 Varjosalo-Supert-Furga-2013 Venkatesan-Vidal-2009 Vinayagam-Wanker-2011 Wagner-Choudhary-2011  
 Wallach-Kramer-2013 Wang-Balch-2006 Wang-He-2008 Wang-Yang-2011 Weimann-Stelzl-2013 A

Weimann-Stelzl-2013 B Weinmann-Meister-2009 Wilker-Yaffe-2007 Wong-O'Bryan-2012  
Woods-Monteiro-2012 Woodsmith-Sanderson-2012 Wu-Li-2007 Wu-Ma-2012 Xiao-Lefkowitz-2007  
Xie-Cong-2013 Xu-Jaffrey-2010 Xu-Ye-2012 Yang-Chen-2010 Yatim-Benkirane-2012 Yu-Chow-2013  
Yu-Vidal-2011 Zanon-Pichler-2013 Zhang-Zou-2011 Zhao-Krug-2005 Zhao-Yang-2011  
Zhou-Conrads-2004 Zhou-Liang-2012 de Hoog-Mann-2004 van Wijk-Timmers-2009

**Predicted:**

I2D-BIND-Fly2Human I2D-BIND-Mouse2Human I2D-BIND-Rat2Human I2D-BIND-Worm2Human  
I2D-BIND-Yeast2Human I2D-BioGRID-Fly2Human I2D-BioGRID-Mouse2Human I2D-BioGRID-Rat2Human  
I2D-BioGRID-Worm2Human I2D-BioGRID-Yeast2Human  
I2D-Chen-Pawson-2009-PiwiScreen-Mouse2Human I2D-Formstecher-Daviet-2005-Embryo-Fly2Human  
I2D-Giot-Rothbert-2003-Low-Fly2Human I2D-INNATEDB-Mouse2Human I2D-IntAct-Fly2Human  
I2D-IntAct-Mouse2Human I2D-IntAct-Rat2Human I2D-IntAct-Worm2Human I2D-IntAct-Yeast2Human  
I2D-Krogan-Greenblatt-2006-Core-Yeast2Human I2D-Krogan-Greenblatt-2006-NonCore-Yeast2Human  
I2D-Li-Vidal-2004-CORE-1-Worm2Human I2D-Li-Vidal-2004-non-core-Worm2Human  
I2D-MGI-Mouse2Human I2D-MINT-Fly2Human I2D-MINT-Mouse2Human I2D-MINT-Rat2Human  
I2D-MINT-Worm2Human I2D-MINT-Yeast2Human I2D-Manual-Mouse2Human I2D-Manual-Rat2Human  
I2D-Ptacek-Snyder-2005-Yeast2Human I2D-Tarassov-PCA-Yeast2Human  
I2D-Tewari-Vidal-2004-TGFb-Worm2Human I2D-Wang-Orkin-2006-EScmplx-Mouse2Human  
I2D-Wang-Orkin-2006-EScmplxlow-Mouse2Human I2D-Yu-Vidal-2008-GoldStd-Yeast2Human  
I2D-vonMering-Bork-2002-High-Yeast2Human I2D-vonMering-Bork-2002-Low-Yeast2Human  
I2D-vonMering-Bork-2002-Medium-Yeast2Human Stuart-Kim-2003

**Shared protein domains:**

INTERPRO PFAM

Network weighting: Automatically selected weighting method (Assigned based on query genes)

Number of gene results: 20

## Networks

|                                                                                                                                                                                    |                |
|------------------------------------------------------------------------------------------------------------------------------------------------------------------------------------|----------------|
| <b>Shared protein domains</b>                                                                                                                                                      | <b>36.92 %</b> |
| <b>INTERPRO</b>                                                                                                                                                                    | <b>23.32 %</b> |
| Source: <a href="#">Pearson correlation</a> with 562,560 interactions from <a href="#">InterPro</a>                                                                                |                |
| <b>PFAM</b>                                                                                                                                                                        | <b>13.60 %</b> |
| Source: <a href="#">Pearson correlation</a> with 543,464 interactions from <a href="#">Pfam</a>                                                                                    |                |
| <b>Predicted</b>                                                                                                                                                                   | <b>25.37 %</b> |
| <b>I2D-BioGRID-Fly2Human</b>                                                                                                                                                       | <b>13.34 %</b> |
| <a href="#">BioGRID: a general repository for interaction datasets.</a> Stark et al. (2006). <i>Nucleic Acids Res.</i>                                                             |                |
| Note: I2D predictions of protein protein interactions using BioGRID Drosophila melanogaster data                                                                                   |                |
| Source: <a href="#">Direct interaction</a> with 4,100 interactions from <a href="#">I2D</a>                                                                                        |                |
| <b>I2D-MINT-Fly2Human</b>                                                                                                                                                          | <b>8.54 %</b>  |
| <a href="#">MINT: a Molecular INteraction database.</a> Zanzoni et al. (2002). <i>FEBS Lett.</i>                                                                                   |                |
| Note: I2D predictions of protein protein interactions using MINT Drosophila melanogaster data                                                                                      |                |
| Source: <a href="#">Direct interaction</a> with 2,986 interactions from <a href="#">I2D</a>                                                                                        |                |
| <b>I2D-IntAct-Fly2Human</b>                                                                                                                                                        | <b>3.49 %</b>  |
| <a href="#">The IntAct molecular interaction database in 2010.</a> Aranda et al. (2010). <i>Nucleic Acids Res.</i>                                                                 |                |
| Note: I2D predictions of protein protein interactions using IntAct Drosophila melanogaster data                                                                                    |                |
| Source: <a href="#">Direct interaction</a> with 3,934 interactions from <a href="#">I2D</a>                                                                                        |                |
| <b>Co-expression</b>                                                                                                                                                               | <b>23.69 %</b> |
| <b>Alizadeh-Staudt-2000</b>                                                                                                                                                        | <b>6.15 %</b>  |
| <a href="#">Distinct types of diffuse large B-cell lymphoma identified by gene expression profiling.</a> Alizadeh et al. (2000). <i>Nature.</i>                                    |                |
| Source: <a href="#">Pearson correlation</a> with 88,888 interactions from supplementary material                                                                                   |                |
| Tags: cultured cells; cancer                                                                                                                                                       |                |
| <b>Ramaswamy-Golub-2001</b>                                                                                                                                                        | <b>4.78 %</b>  |
| <a href="#">Multiclass cancer diagnosis using tumor gene expression signatures.</a> Ramaswamy et al. (2001). <i>Proc Natl Acad Sci U S A.</i>                                      |                |
| Source: <a href="#">Pearson correlation</a> with 270,142 interactions from supplementary material                                                                                  |                |
| Tags: cancer                                                                                                                                                                       |                |
| <b>Wu-Garvey-2007</b>                                                                                                                                                              | <b>2.54 %</b>  |
| <a href="#">The effect of insulin on expression of genes and biochemical pathways in human skeletal muscle.</a> Wu et al. (2007). <i>Endocrine.</i>                                |                |
| Source: <a href="#">Pearson correlation</a> with 260,762 interactions from <a href="#">GEO</a>                                                                                     |                |
| Tags: transcription factors; muscle; cultured cells                                                                                                                                |                |
| <b>Arijs-Rutgeerts-2009</b>                                                                                                                                                        | <b>2.37 %</b>  |
| <a href="#">Mucosal gene expression of antimicrobial peptides in inflammatory bowel disease before and after first infliximab treatment.</a> Arijs et al. (2009). <i>PLoS One.</i> |                |
| Source: <a href="#">Pearson correlation</a> with 653,194 interactions from <a href="#">GEO</a>                                                                                     |                |
| Tags: immune system                                                                                                                                                                |                |
| <b>Roth-Zlotnik-2006</b>                                                                                                                                                           | <b>2.33 %</b>  |
| <a href="#">Gene expression analyses reveal molecular relationships among 20 regions of the human CNS.</a> Roth et al. (2006). <i>Neurogenetics.</i>                               |                |
| Source: <a href="#">Pearson correlation</a> with 666,614 interactions from <a href="#">GEO</a>                                                                                     |                |



|                                                                                                                                                                                                                                                |               |
|------------------------------------------------------------------------------------------------------------------------------------------------------------------------------------------------------------------------------------------------|---------------|
| <b>Gysin-McMahon-2012</b>                                                                                                                                                                                                                      | <b>1.41 %</b> |
| <a href="#">Analysis of mRNA profiles after MEK1/2 inhibition in human pancreatic cancer cell lines reveals pathways involved in drug sensitivity.</a> Gysin et al. (2012). <i>Mol Cancer Res.</i>                                             |               |
| Source: <a href="#">Pearson correlation</a> with 388,454 interactions from <a href="#">GEO</a>                                                                                                                                                 |               |
| Tags: cell proliferation; cultured cells; cell line; signal transduction; cancer                                                                                                                                                               |               |
| <b>Kang-Willman-2010</b>                                                                                                                                                                                                                       | <b>1.38 %</b> |
| <a href="#">Gene expression classifiers for relapse-free survival and minimal residual disease improve risk classification and outcome prediction in pediatric B-precursor acute lymphoblastic leukemia.</a> Kang et al. (2010). <i>Blood.</i> |               |
| Source: <a href="#">Pearson correlation</a> with 656,632 interactions from <a href="#">GEO</a>                                                                                                                                                 |               |
| Tags: transcription factors; lymphoma; cancer                                                                                                                                                                                                  |               |
| <b>Perou-Botstein-1999</b>                                                                                                                                                                                                                     | <b>1.16 %</b> |
| <a href="#">Distinctive gene expression patterns in human mammary epithelial cells and breast cancers.</a> Perou et al. (1999). <i>Proc Natl Acad Sci U S A.</i>                                                                               |               |
| Source: <a href="#">Pearson correlation</a> with 62,886 interactions from supplementary material                                                                                                                                               |               |
| Tags: cultured cells; cancer; epithelial cells; signal transduction; breast; stromal cells; transcription factors; breast cancer                                                                                                               |               |
| <b>Boldrick-Relman-2002</b>                                                                                                                                                                                                                    | <b>0.80 %</b> |
| <a href="#">Stereotyped and specific gene expression programs in human innate immune responses to bacteria.</a> Boldrick et al. (2002). <i>Proc Natl Acad Sci U S A.</i>                                                                       |               |
| Source: <a href="#">Pearson correlation</a> with 108,543 interactions from supplementary material                                                                                                                                              |               |
| Tags: immune system                                                                                                                                                                                                                            |               |
| <b>Rieger-Chu-2004</b>                                                                                                                                                                                                                         | <b>0.71 %</b> |
| <a href="#">Toxicity from radiation therapy associated with abnormal transcriptional responses to DNA damage.</a> Rieger et al. (2004). <i>Proc Natl Acad Sci U S A.</i>                                                                       |               |
| Source: <a href="#">Pearson correlation</a> with 259,055 interactions from <a href="#">GEO</a>                                                                                                                                                 |               |
| Tags: cultured cells; cell line                                                                                                                                                                                                                |               |
| <b>Smirnov-Cheung-2009</b>                                                                                                                                                                                                                     | <b>0.05 %</b> |
| <a href="#">Genetic analysis of radiation-induced changes in human gene expression.</a> Smirnov et al. (2009). <i>Nature.</i>                                                                                                                  |               |
| Source: <a href="#">Pearson correlation</a> with 463,390 interactions from <a href="#">GEO</a>                                                                                                                                                 |               |
| Tags: transcription factors; cultured cells; cell line                                                                                                                                                                                         |               |
| <b>Cheok-Evans-2003</b>                                                                                                                                                                                                                        | <b>0.01 %</b> |
| <a href="#">Treatment-specific changes in gene expression discriminate in vivo drug response in human leukemia cells.</a> Cheok et al. (2003). <i>Nat Genet.</i>                                                                               |               |
| Source: <a href="#">Pearson correlation</a> with 263,940 interactions from <a href="#">GEO</a>                                                                                                                                                 |               |
| Tags: chemotherapy; cultured cells; lymphoma; cancer                                                                                                                                                                                           |               |
| <b>Physical interactions</b>                                                                                                                                                                                                                   | <b>6.99 %</b> |
| <b>Varjosalo-Gstaiger-2013 A</b>                                                                                                                                                                                                               | <b>2.93 %</b> |
| <a href="#">The protein interaction landscape of the human CMGC kinase group.</a> Varjosalo et al. (2013). <i>Cell Rep.</i>                                                                                                                    |               |
| Note: One of 2 datasets produced from this publication.                                                                                                                                                                                        |               |
| Source: <a href="#">Direct interaction</a> with 686 interactions from <a href="#">BioGRID</a>                                                                                                                                                  |               |
| Tags: cultured cells; cell line                                                                                                                                                                                                                |               |
| <b>IREF-OPHID</b>                                                                                                                                                                                                                              | <b>2.17 %</b> |
| Source: <a href="#">Direct interaction</a> with 44,492 interactions from <a href="#">iRefindex</a>                                                                                                                                             |               |
| <b>Cheng-Chen-2010</b>                                                                                                                                                                                                                         | <b>1.89 %</b> |
| <a href="#">Quantitative nanoproteomics for protein complexes (QNanoPX) related to estrogen transcriptional action.</a> Cheng et al. (2010). <i>Mol Cell Proteomics.</i>                                                                       |               |

Source: [Direct interaction](#) with 259 interactions from [iRefIndex](#)

Tags: transcription factors; cell line; cancer; cultured cells

---

**Co-localization** **2.61 %**

**Schadt-Shoemaker-2004** **1.99 %**

[A comprehensive transcript index of the human genome generated using microarrays and computational approaches.](#) Schadt et al. (2004). *Genome Biol.*

Note: Predicted transcript array

Source: [Pearson correlation](#) with 60,216 interactions from [GEO](#)

---

**Johnson-Shoemaker-2003** **0.62 %**

[Genome-wide survey of human alternative pre-mRNA splicing with exon junction microarrays.](#) Johnson et al. (2003). *Science.*

Source: [Pearson correlation](#) with 426,640 interactions from [GEO](#)

Tags: cultured cells; cell line

---

**Pathway** **2.36 %**

**PATHWAYCOMMONS-REACTOME** **1.42 %**

Source: [Direct interaction](#) with 24,930 interactions from [Pathway Commons](#)

**PATHWAYCOMMONS-NCI\_NATURE** **0.66 %**

Source: [Direct interaction](#) with 10,109 interactions from [Pathway Commons](#)

---

**Wu-Stein-2010** **0.28 %**

[A human functional protein interaction network and its application to cancer data analysis.](#) Wu et al. (2010). *Genome Biol.*

Source: 78,183 interactions from supplementary material

Tags: transcription factors; cancer

---

**Genetic interactions** **2.06 %**

**Lin-Smith-2010** **2.06 %**

[A genome-wide map of human genetic interactions inferred from radiation hybrid genotypes.](#) Lin et al. (2010). *Genome Res.*

Source: 4,836,794 interactions from supplementary material

---

# Attributes

---

| <u>Attribute</u> | <u>Gene</u> |
|------------------|-------------|
|------------------|-------------|

## Genes

**DHODH (Q02127)** dihydroorotate dehydrogenase (quinone) [Source:HGNC Symbol;Acc:2867]

Functions:

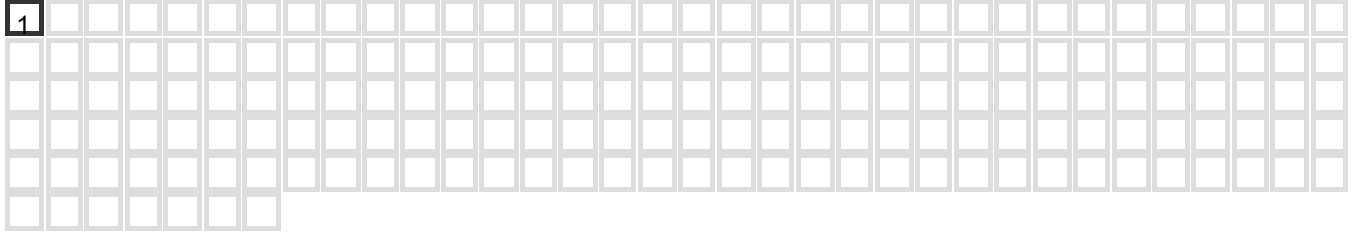

Synonyms: ENSG00000102967; ENSP00000219240; ENSP00000460966; ENSP00000461848; ENSP00000464249; ENSP00000464333; 1723; DHODH; NP\_001352; NM\_001361; PYRD\_HUMAN; Q02127;

More at [Entrez](#)

**NR1H4 (Q96R11)** nuclear receptor subfamily 1, group H, member 4 [Source:HGNC Symbol;Acc:7967]

Functions:

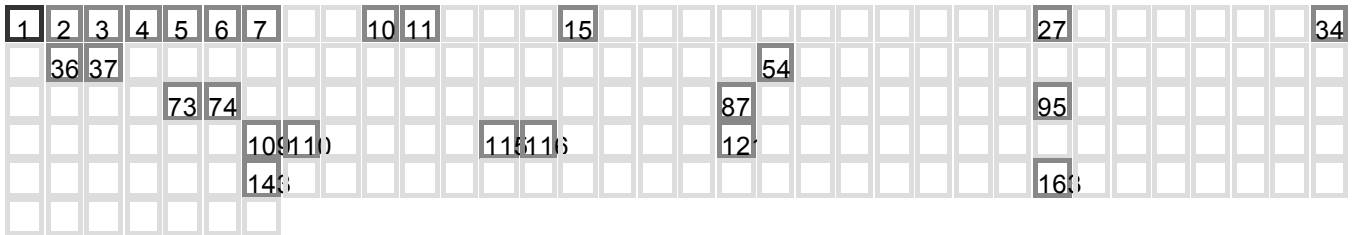

Synonyms: ENSG00000012504; ENSP00000188403; ENSP00000315442; ENSP00000376712; ENSP00000446584; ENSP00000446760; ENSP00000446861; ENSP00000447149; ENSP00000448506; ENSP00000448978; 9971; NR1H4; NP\_001193906; NP\_001193907; NP\_001193908; NP\_001193921; NP\_001193922; NP\_005114; NM\_001206977; NM\_001206978; NM\_001206979; NM\_001206992; NM\_001206993; NM\_005123; FXR; HRR-1; HRR1; RIP14; NR1H4\_HUMAN; Q96R11;

More at [Entrez](#)

**PPARD (Q03181)** peroxisome proliferator-activated receptor delta [Source:HGNC Symbol;Acc:9235]

Functions:

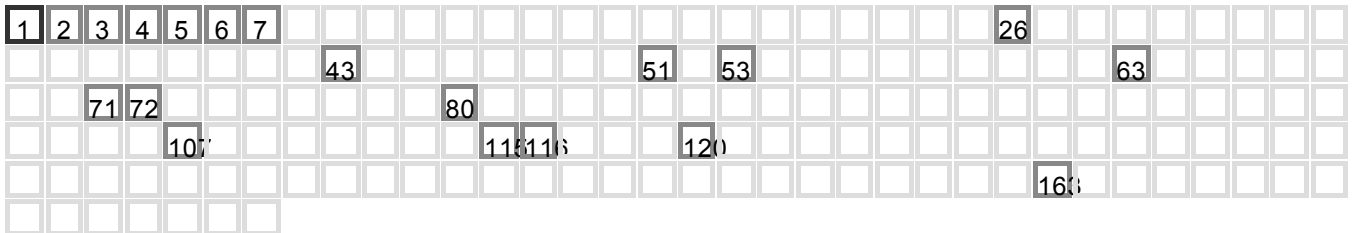

Synonyms: ENSG00000112033; ENSP00000310928; ENSP00000337063; ENSP00000353916; ENSP00000410837; ENSP00000413314; ENSP00000414372; ENSP00000443759; 5467; PPARD; NP\_001165289; NP\_001165290; NP\_001165291; NP\_006229; NP\_803184; NM\_001171818; NM\_001171819; NM\_001171820; NM\_006238; NM\_177435; FAAR; NR1C2; NUC1; NUC11; PPARD\_HUMAN; Q03181;

More at [Entrez](#)

**PPARA (Q07869)** peroxisome proliferator-activated receptor alpha [Source:HGNC Symbol;Acc:9232]

Functions:

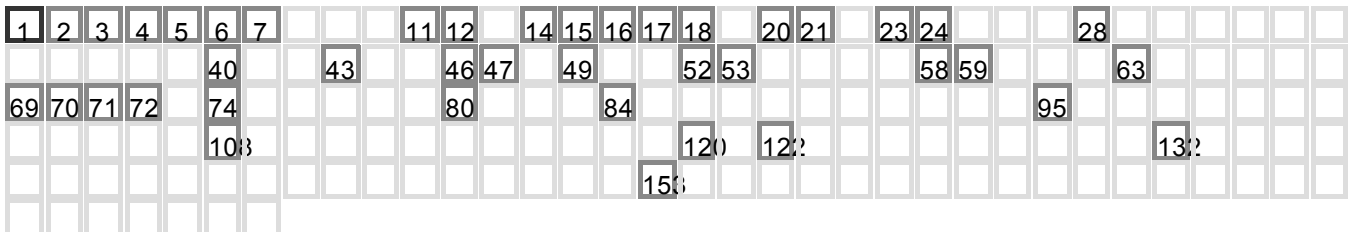

Synonyms: ENSG00000186951; ENSP00000262735; ENSP00000379322; ENSP00000385246; ENSP00000385523; ENSP00000397291; ENSP00000408149; ENSP00000411677; ENSP00000414752; 5465; PPARA; NP\_001001928; NP\_005027; NM\_001001928; NM\_005036; hPPAR; NR1C1; PPAR; PPARA\_HUMAN;

Q07869;

More at [Entrez](#)

**THRB (P10828)** thyroid hormone receptor, beta [Source:HGNC Symbol;Acc:11799]

Functions:

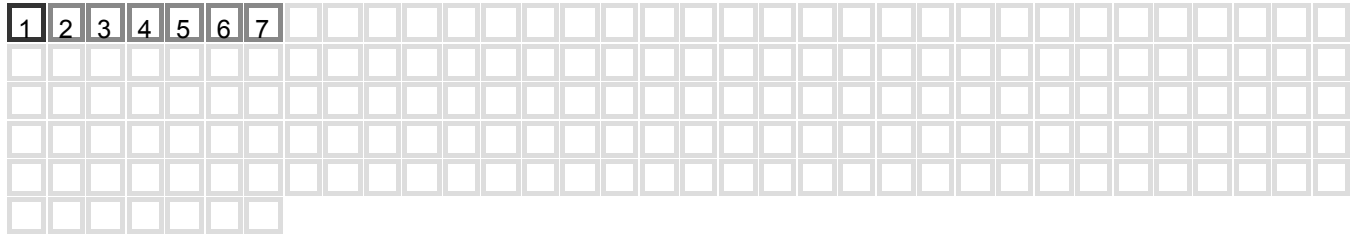

Synonyms: ENSG00000151090; ENSP00000280696; ENSP00000348827; ENSP00000379904; ENSP00000388467; ENSP00000393932; ENSP00000395362; ENSP00000399573; ENSP00000404233; ENSP00000404898; ENSP00000414100; ENSP00000414444; ENSP00000414910; 7068; THRB; NP\_000452; NP\_001121648; NP\_001121649; NP\_001239563; NM\_000461; NM\_001128176; NM\_001128177; NM\_001252634; ERBA-BETA; ERBA2; NR1A2; PRTH; THR1; THRB1; THRB2; P10828; THB\_HUMAN;

More at [Entrez](#)

**FGFR1 (P11362)** fibroblast growth factor receptor 1 [Source:HGNC Symbol;Acc:3688]

Functions:

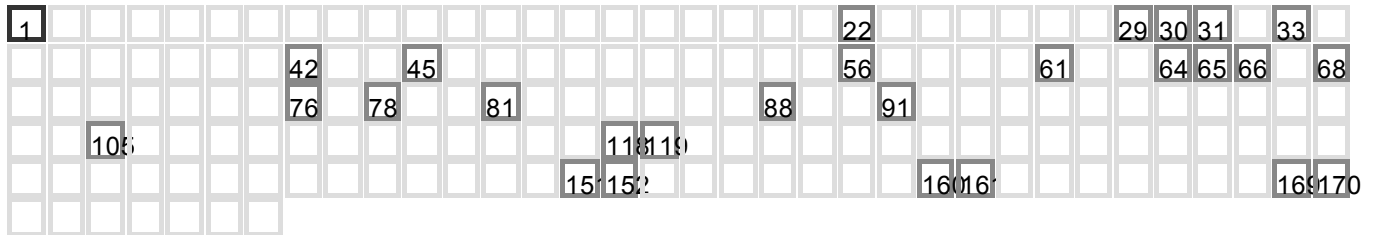

Synonyms: ENSG00000077782; ENSP00000327229; ENSP00000337247; ENSP00000340636; ENSP00000348537; ENSP00000380280; ENSP00000380292; ENSP00000380297; ENSP00000380302; ENSP00000392645; ENSP00000393312; ENSP00000398318; ENSP00000400162; ENSP00000400708; ENSP00000432972; ENSP00000433163; ENSP00000433569; ENSP00000434473; ENSP00000434712; ENSP00000434800; ENSP00000434869; ENSP00000435254; ENSP00000435283; 2260; FGFR1; NP\_001167534; NP\_001167535; NP\_001167536; NP\_001167537; NP\_001167538; NP\_056934; NP\_075593; NP\_075594; NP\_075598; NM\_001174063; NM\_001174064; NM\_001174065; NM\_001174066; NM\_001174067; NM\_015850; NM\_023105; NM\_023106; NM\_023110; BFGFR; CD331; CEK; FLT2; KAL2; N-SAM; FGFR1\_HUMAN; P11362;

More at [Entrez](#)

**PPARG (P37231)** peroxisome proliferator-activated receptor gamma [Source:HGNC Symbol;Acc:9236]

Functions:

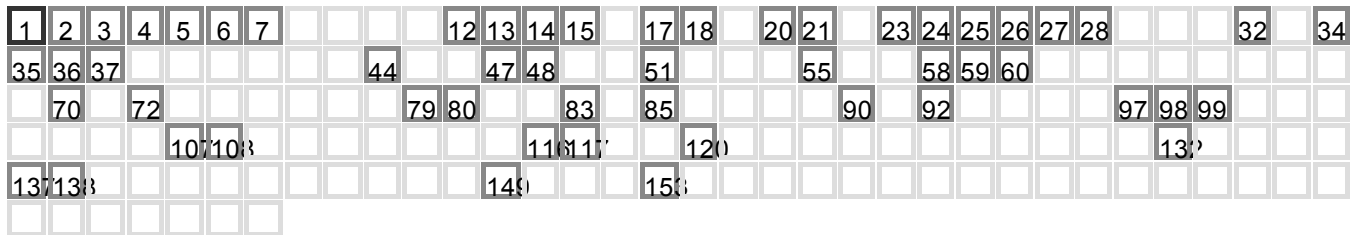

Synonyms: ENSG00000132170; ENSP00000287820; ENSP00000312472; ENSP00000380195; ENSP00000380196; ENSP00000380205; ENSP00000380207; ENSP00000380210; ENSP00000380218; ENSP00000380221; ENSP00000380224; ENSP00000392285; ENSP00000411931; ENSP00000438940; 5468; PPARG; NP\_005028; NP\_056953; NP\_619725; NP\_619726; NM\_005037; NM\_015869; NM\_138711; NM\_138712; NR1C3; PPARG1; PPARG2; PPARgamma; P37231; PPARG\_HUMAN;

More at [Entrez](#)

**FGFR2 (P21802)** fibroblast growth factor receptor 2 [Source:HGNC Symbol;Acc:3689]

Functions:

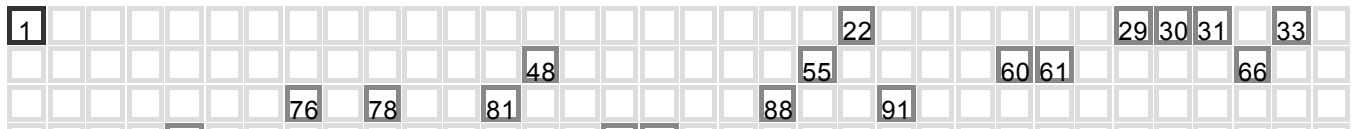

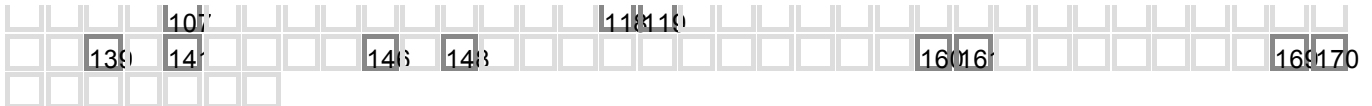

Synonyms: ENSG0000066468; ENSP00000263451; ENSP00000309878; ENSP00000337665; ENSP00000348559; ENSP00000350166; ENSP00000351276; ENSP00000352309; ENSP00000353262; ENSP00000358052; ENSP00000358054; ENSP00000358055; ENSP00000358056; ENSP00000358057; ENSP00000404219; ENSP00000410294; ENSP00000474011; ENSP00000474109; 2263; FGFR2; NP\_000132; NP\_001138385; NP\_001138386; NP\_001138387; NP\_001138388; NP\_001138389; NP\_001138390; NP\_001138391; NP\_075259; NP\_075418; NM\_000141; NM\_001144913; NM\_001144914; NM\_001144915; NM\_001144916; NM\_001144917; NM\_001144918; NM\_001144919; NM\_022970; NM\_023029; BEK; CD332; CEK3; ECT1; JWS; K-SAM; KGFR; TK14; TK25; FGFR2\_HUMAN; P21802;

More at [Entrez](#)

**NR1H2 (P55055)** nuclear receptor subfamily 1, group H, member 2 [Source:HGNC Symbol;Acc:7965]

Functions:

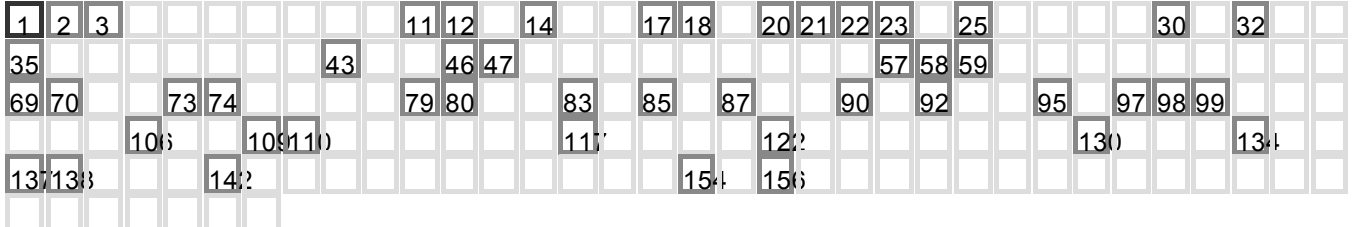

Synonyms: ENSG00000131408; ENSP00000253727; ENSP00000396151; ENSP00000445074; ENSP00000469778; ENSP00000470518; ENSP00000471194; ENSP00000471294; ENSP00000472138; ENSP00000472271; ENSP00000472526; ENSP00000473099; 7376; NR1H2; NP\_001243576; NP\_009052; NM\_001256647; NM\_007121; LXR-b; NER; NER-I; RIP15; NR1H2\_HUMAN; P55055;

More at [Entrez](#)

**FLT1 (P17948)** fms-related tyrosine kinase 1 [Source:HGNC Symbol;Acc:3763]

Functions:

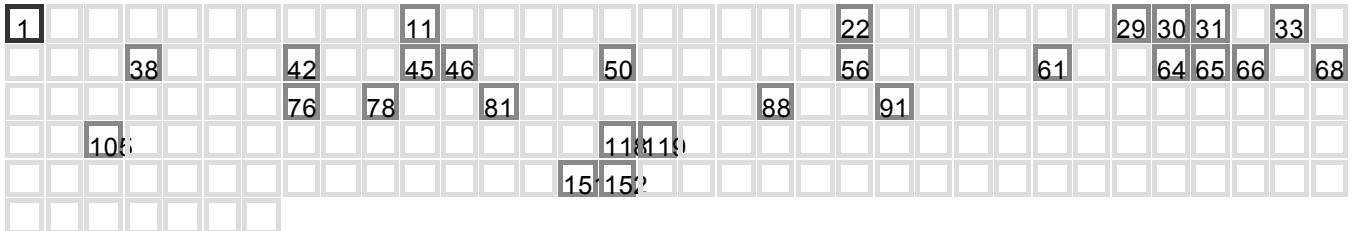

Synonyms: ENSG00000102755; ENSP00000282397; ENSP00000437631; ENSP00000437841; ENSP00000442630; ENSP00000443311; 2321; FLT1; NP\_001153392; NP\_001153502; NP\_001153503; NP\_002010; NM\_001160030; NM\_001160031; NM\_002019; FLT; VEGFR1; P17948; VGFR1\_HUMAN;

More at [Entrez](#)

**CA1 (P00915)** carbonic anhydrase I [Source:HGNC Symbol;Acc:1368]

Functions:

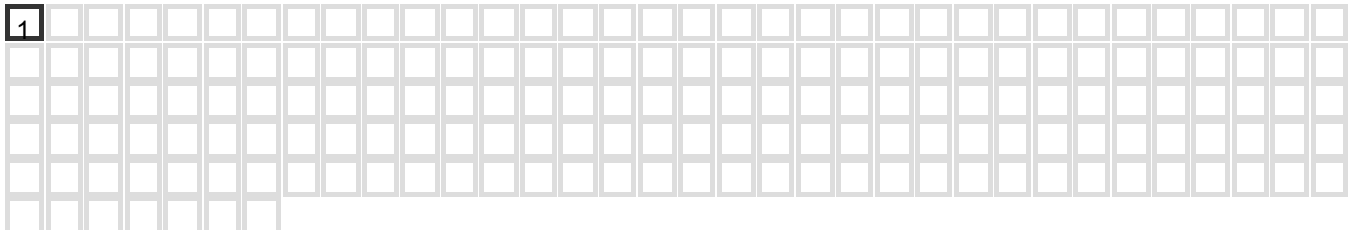

Synonyms: ENSG00000133742; ENSP00000256119; ENSP00000392338; ENSP00000401551; ENSP00000427773; ENSP00000427852; ENSP00000428923; ENSP00000429300; ENSP00000429688; ENSP00000429798; ENSP00000429843; ENSP00000430372; ENSP00000430471; ENSP00000430543; ENSP00000430571; ENSP00000430656; ENSP00000430710; ENSP00000430737; ENSP00000430861; ENSP00000430975; ENSP00000443517; 759; CA1; NP\_001122301; NP\_001122302; NP\_001122303; NP\_001158302; NP\_001729; NM\_001128829; NM\_001128830; NM\_001128831; NM\_001164830; NM\_001738; CAH1\_HUMAN; P00915;

More at [Entrez](#)

**MMP13 (P45452)** matrix metalloproteinase 13 (collagenase 3) [Source:HGNC Symbol;Acc:7159]

Functions:

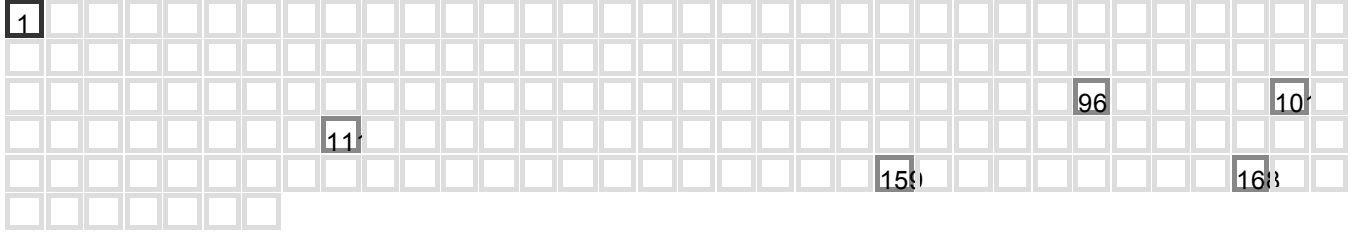

Synonyms: ENSG00000137745; ENSG00000262325; ENSP00000260302; ENSP00000339672; ENSP00000460695; ENSP00000461440; 4322; MMP13; NP\_002418; NM\_002427; CLG3; MMP13\_HUMAN; P45452;

More at [Entrez](#)

**REN (P00797)** renin [Source:HGNC Symbol;Acc:9958]

Functions:

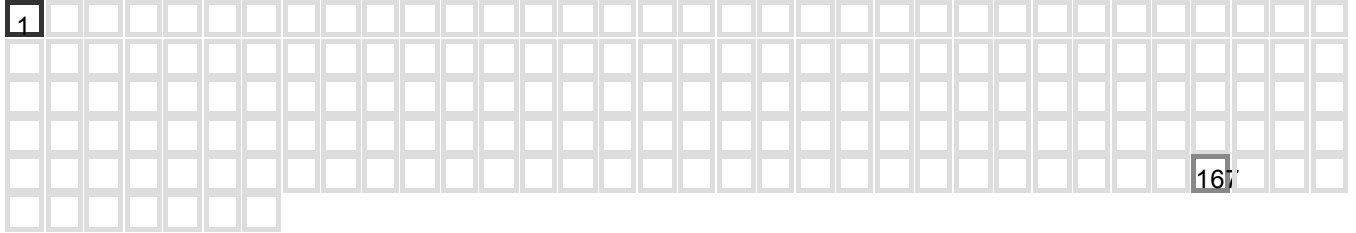

Synonyms: ENSG00000143839; ENSP00000272190; ENSP00000356163; 5972; REN; NP\_000528; NM\_000537; P00797; RENI\_HUMAN;

More at [Entrez](#)

**MMP3 (P08254)** matrix metalloproteinase 3 (stromelysin 1, progelatinase) [Source:HGNC Symbol;Acc:7173]

Functions:

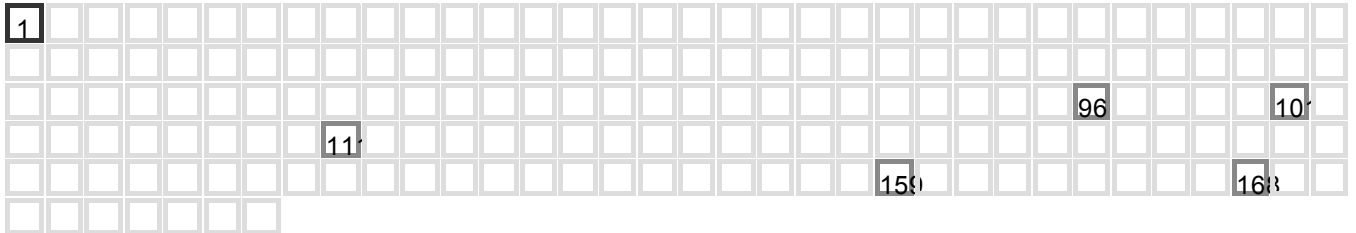

Synonyms: ENSG00000149968; ENSG00000263313; ENSP00000299855; ENSP00000398346; ENSP00000435255; ENSP00000458496; ENSP00000459512; ENSP00000459712; 4314; MMP3; NP\_002413; NM\_002422; STMY; STMY1; MMP3\_HUMAN; P08254;

More at [Entrez](#)

**LTA4H (P09960)** leukotriene A4 hydrolase [Source:HGNC Symbol;Acc:6710]

Functions:

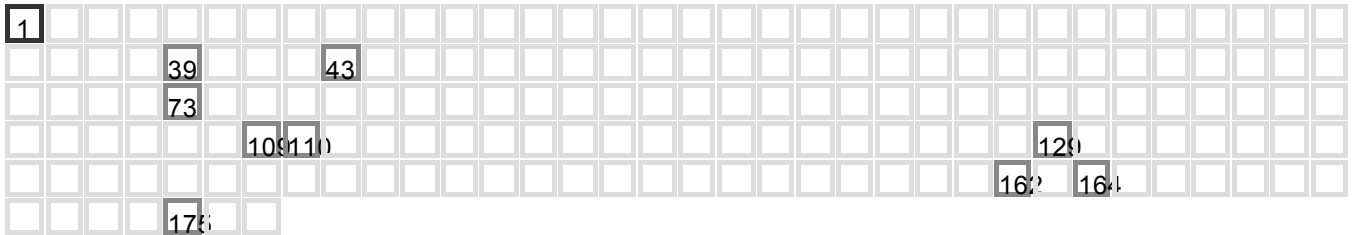

Synonyms: ENSG00000111144; ENSP00000228740; ENSP00000395051; ENSP00000449340; ENSP00000449958; 101928830; 4048; LTA4H; NP\_000886; NP\_001243572; NP\_001243573; NM\_000895; NM\_001256643; NM\_001256644; LKHA4\_HUMAN; P09960;

More at [Entrez](#)

**F10 (P00742)** coagulation factor X [Source:HGNC Symbol;Acc:3528]

Functions:

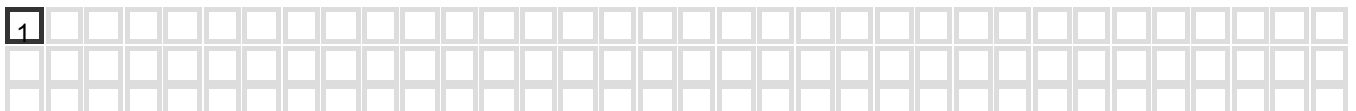

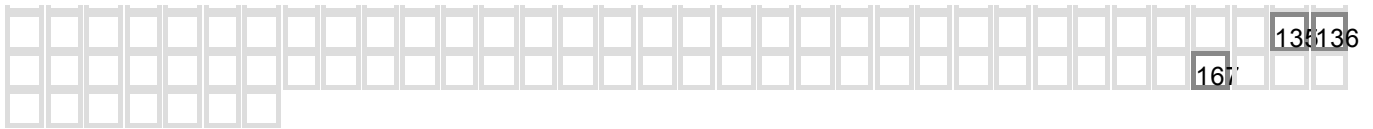

Synonyms: ENSG00000126218; ENSP00000364701; ENSP00000364709; ENSP00000386320; ENSP00000387092; 2159; F10; NP\_000495; NM\_000504; FA10\_HUMAN; P00742;

More at [Entrez](#)

**MMP12 (P39900)** matrix metalloproteinase 12 (macrophage elastase) [Source:HGNC Symbol;Acc:7158]

Functions:

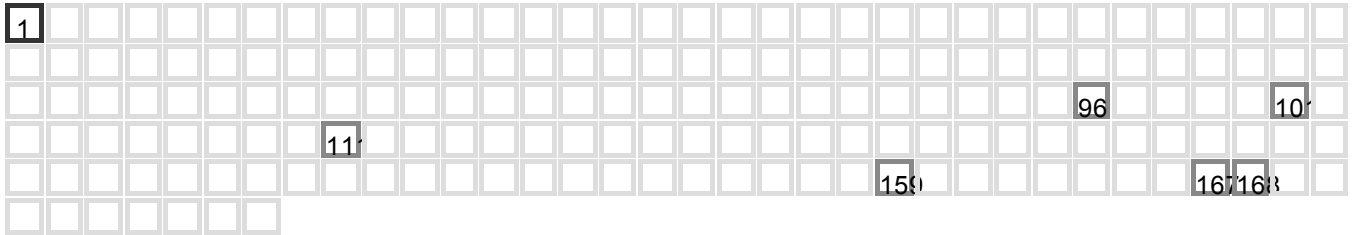

Synonyms: ENSG00000262406; ENSP00000458585; 4321; MMP12; NP\_002417; NM\_002426; HME; MMP12\_HUMAN; P39900;

More at [Entrez](#)

**PLA2G2A (P14555)** phospholipase A2, group IIA (platelets, synovial fluid) [Source:HGNC Symbol;Acc:9031]

Functions:

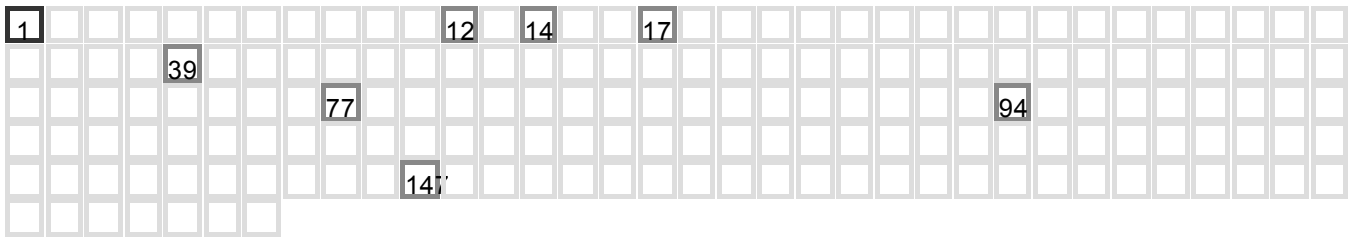

Synonyms: ENSG00000188257; ENSP00000364252; ENSP00000383364; 5320; PLA2G2A; NP\_000291; NP\_001155199; NP\_001155200; NP\_001155201; NM\_000300; NM\_001161727; NM\_001161728; NM\_001161729; PLA2B; P14555; PA2GA\_HUMAN;

More at [Entrez](#)

**JAK2 (O60674)** Janus kinase 2 [Source:HGNC Symbol;Acc:6192]

Functions:

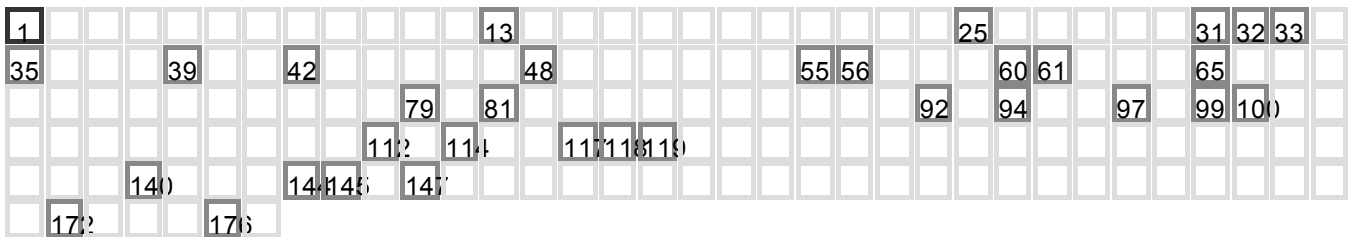

Synonyms: ENSG00000096968; ENSP00000371067; ENSP00000440387; ENSP00000443103; 3717; JAK2; NP\_004963; NM\_004972; JTK10; JAK2\_HUMAN; O60674;

More at [Entrez](#)

**EPHX2 (P34913)** epoxide hydrolase 2, cytoplasmic [Source:HGNC Symbol;Acc:3402]

Functions:

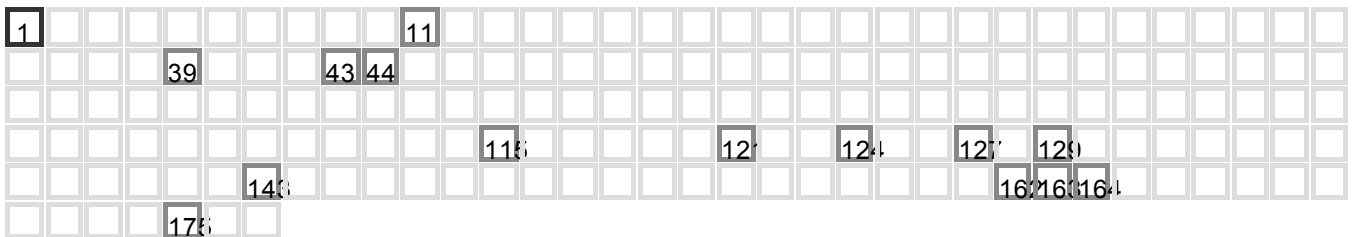

Synonyms: ENSG00000120915; ENSP00000369843; ENSP00000427956; ENSP00000428191; ENSP00000428875; ENSP00000430269; ENSP00000430302; ENSP00000430779; 2053; EPHX2;



NP\_001243411; NP\_001243412; NP\_001243413; NP\_001970; NM\_001256482; NM\_001256483; NM\_001256484; NM\_001979; HYES\_HUMAN; P34913;

More at [Entrez](#)

**PIK3CG (P48736)** phosphatidylinositol-4,5-bisphosphate 3-kinase, catalytic subunit gamma [Source:HGNC Symbol;Acc:3535]

Functions:

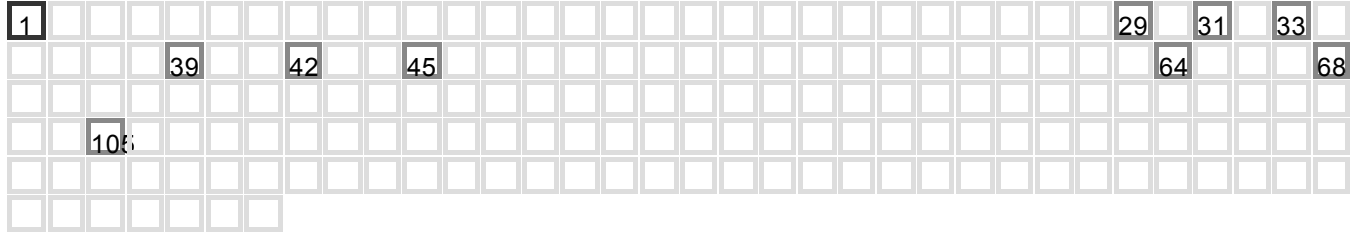

Synonyms: ENSG00000105851; ENSP00000352121; ENSP00000392258; ENSP00000417623; ENSP00000419260; 5294; PIK3CG; NP\_001269355; NP\_001269356; NP\_002640; NM\_001282426; NM\_001282427; NM\_002649; P48736; PK3CG\_HUMAN;

More at [Entrez](#)

**F2 (P00734)** coagulation factor II (thrombin) [Source:HGNC Symbol;Acc:3535]

Functions:

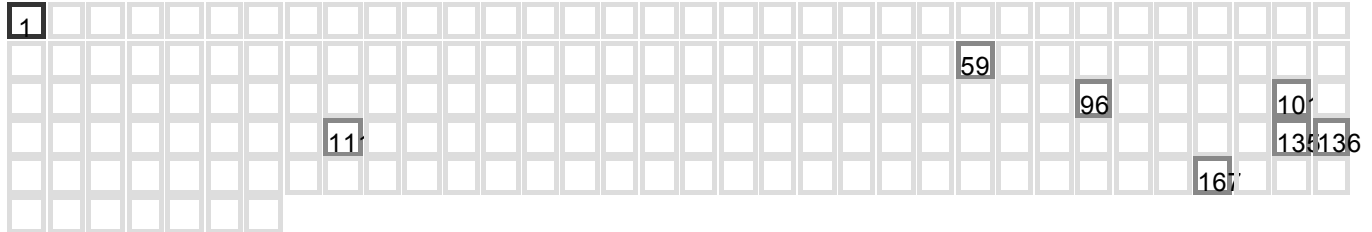

Synonyms: ENSG00000180210; ENSP00000308541; ENSP00000387413; ENSP00000433907; 2147; F2; NP\_000497; NM\_000506; P00734; THRB\_HUMAN;

More at [Entrez](#)

**KDR (P35968)** kinase insert domain receptor (a type III receptor tyrosine kinase) [Source:HGNC Symbol;Acc:6307]

Functions:

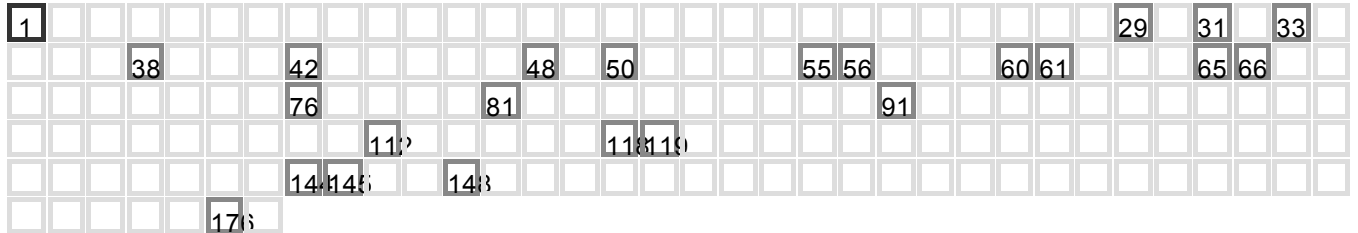

Synonyms: ENSG00000128052; ENSP00000263923; 3791; KDR; NP\_002244; NM\_002253; CD309; FLK1; VEGFR; VEGFR2; P35968; VGFR2\_HUMAN;

More at [Entrez](#)

**GSK3B (P49841)** glycogen synthase kinase 3 beta [Source:HGNC Symbol;Acc:4617]

Functions:

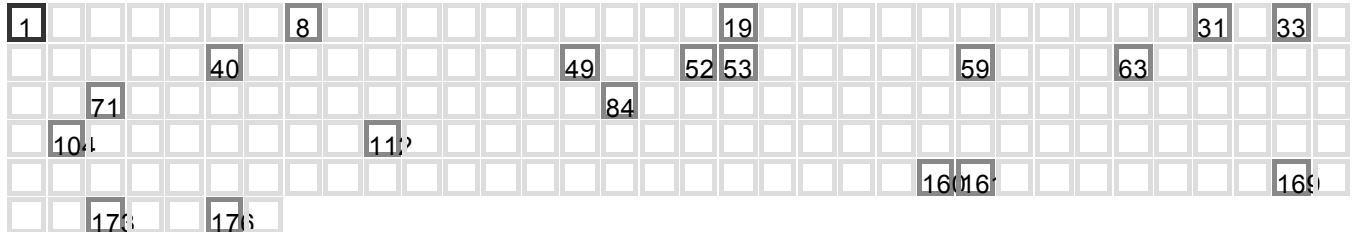

Synonyms: ENSG00000082701; ENSP00000264235; ENSP00000324806; 2932; GSK3B; NP\_001139628; NP\_002084; NM\_001146156; NM\_002093; GSK3B\_HUMAN; P49841;

More at [Entrez](#)

**MAPK10 (P53779)** mitogen-activated protein kinase 10 [Source:HGNC Symbol;Acc:6872]

Functions:

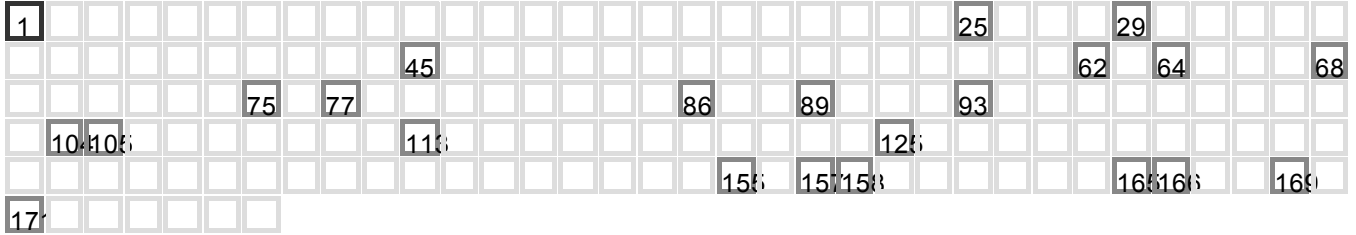

Synonyms: ENSG00000109339; ENSP00000309857; ENSP00000352157; ENSP00000355297; ENSP00000378586; ENSP00000378589; ENSP00000378590; ENSP00000378595; ENSP00000378598; ENSP00000414469; ENSP00000420987; ENSP00000421359; ENSP00000421409; ENSP00000421762; ENSP00000422277; ENSP00000422985; ENSP00000423918; ENSP00000424128; ENSP00000424154; ENSP00000424755; ENSP00000425654; 5602; MAPK10; NP\_002744; NP\_620446; NP\_620447; NP\_620448; NM\_002753; NM\_138980; NM\_138981; NM\_138982; JNK3; p493F12; p54bSAPK; PRKM10; MK10\_HUMAN; P53779;

More at [Entrez](#)

**CDK9 (P50750)** cyclin-dependent kinase 9 [Source:HGNC Symbol;Acc:1780]

Functions:

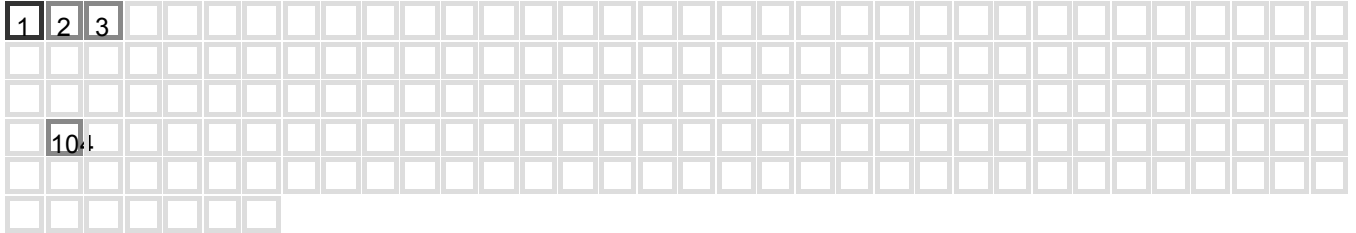

Synonyms: ENSG00000136807; ENSP00000362361; ENSP00000362362; ENSP00000395872; 1025; CDK9; NP\_001252; NM\_001261; C-2k; CDC2L4; PITALRE; TAK; CDK9\_HUMAN; P50750;

More at [Entrez](#)

**ESR1 (P03372)** estrogen receptor 1 [Source:HGNC Symbol;Acc:3467]

Functions:

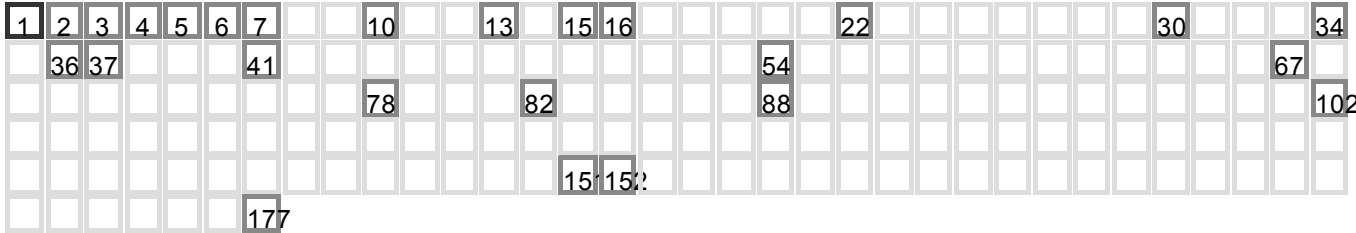

Synonyms: ENSG00000091831; ENSP00000206249; ENSP00000342630; ENSP00000384064; ENSP00000385373; ENSP00000387500; ENSP00000394721; ENSP00000401995; ENSP00000405330; ENSP00000411105; ENSP00000415934; 2099; ESR1; NP\_000116; NP\_001116212; NP\_001116213; NP\_001116214; NM\_000125; NM\_001122740; NM\_001122741; NM\_001122742; Era; ESR; NR3A1; ESR1\_HUMAN; P03372;

More at [Entrez](#)

**MAPK14 (Q16539)** mitogen-activated protein kinase 14 [Source:HGNC Symbol;Acc:6876]

Functions:

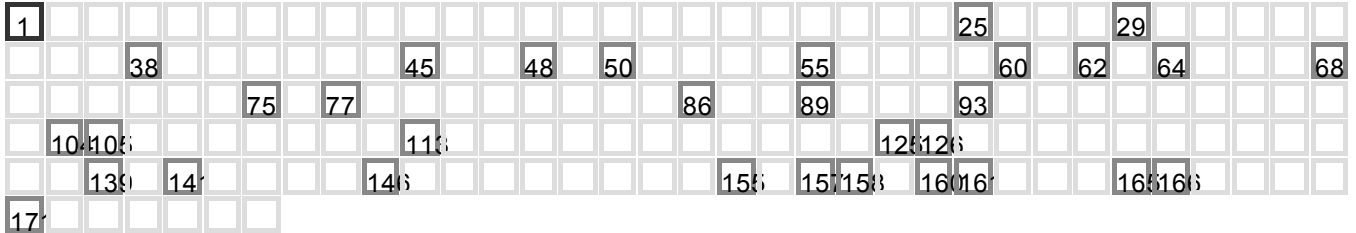

Synonyms: ENSG00000112062; ENSP00000229794; ENSP00000229795; ENSP00000308669; ENSP00000417065; ENSP00000417531; ENSP00000419141; ENSP00000419837; 1432; MAPK14; NP\_001306; NP\_620581; NP\_620582; NP\_620583; NM\_001315; NM\_139012; NM\_139014; CSBP1; CSBP2; CSPB1; Mxi2; PRKM14; PRKM15; MK14\_HUMAN; Q16539;

More at [Entrez](#)





ENSP00000406493; ENSP00000407446; ENSP00000412672; ENSP00000421374; ENSP00000421588; ENSP00000422982; ENSP00000423007; ENSP00000423089; ENSP00000423666; ENSP00000424345; ENSP00000424834; ENSP00000424934; ENSP00000425417; ENSP00000425607; ENSP00000425900; ENSP00000426016; ENSP00000426292; ENSP00000427034; ENSP00000427175; ENSP00000427600; 9970; NR1I3; NP\_001070937; NP\_001070938; NP\_001070939; NP\_001070940; NP\_001070941; NP\_001070942; NP\_001070943; NP\_001070944; NP\_001070945; NP\_001070946; NP\_001070947; NP\_001070948; NP\_001070949; NP\_001070950; NP\_005113; NM\_001077469; NM\_001077470; NM\_001077471; NM\_001077472; NM\_001077473; NM\_001077474; NM\_001077475; NM\_001077476; NM\_001077477; NM\_001077478; NM\_001077479; NM\_001077480; NM\_001077481; NM\_001077482; NM\_005122; MB67; NR1I3\_HUMAN; Q14994;

More at [Entrez](#)

NR1D1 nuclear receptor subfamily 1, group D, member 1 [Source:HGNC Symbol;Acc:7962]

3.25

Functions:

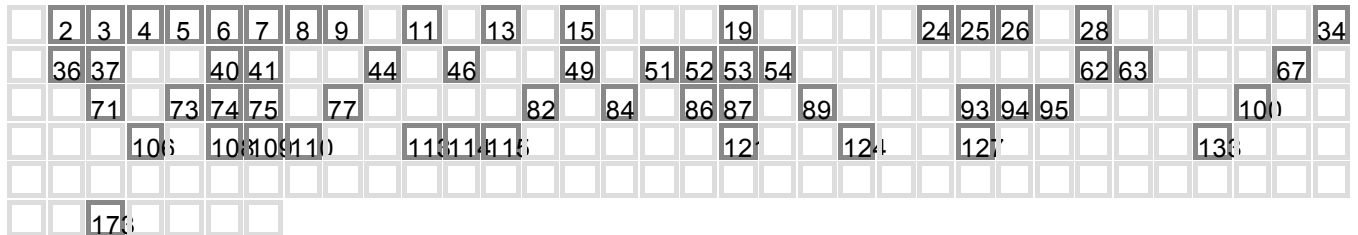

Synonyms: ENSG00000126368; ENSP00000246672; 9572; NR1D1; NP\_068370; NM\_021724; ear-1; hRev; Rev-ErbAalpha; THRAL; NR1D1\_HUMAN; P20393;

More at [Entrez](#)

NR2C1 nuclear receptor subfamily 2, group C, member 1 [Source:HGNC Symbol;Acc:7971]

3.25

Functions:

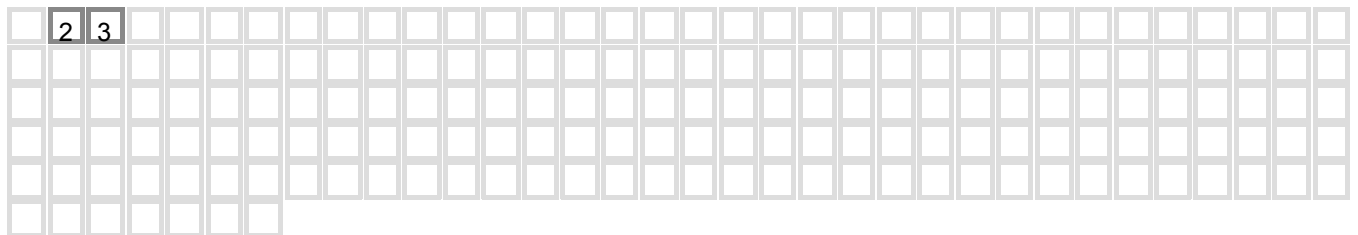

Synonyms: ENSG00000120798; ENSP00000328843; ENSP00000333275; ENSP00000376813; ENSP00000446817; ENSP00000446906; ENSP00000450225; 7181; NR2C1; NP\_001027458; NP\_001120834; NP\_003288; NM\_001032287; NM\_001127362; NM\_003297; TR2-11; NR2C1\_HUMAN; P13056;

More at [Entrez](#)

RORA RAR-related orphan receptor A [Source:HGNC Symbol;Acc:10258]

3.22

Functions:

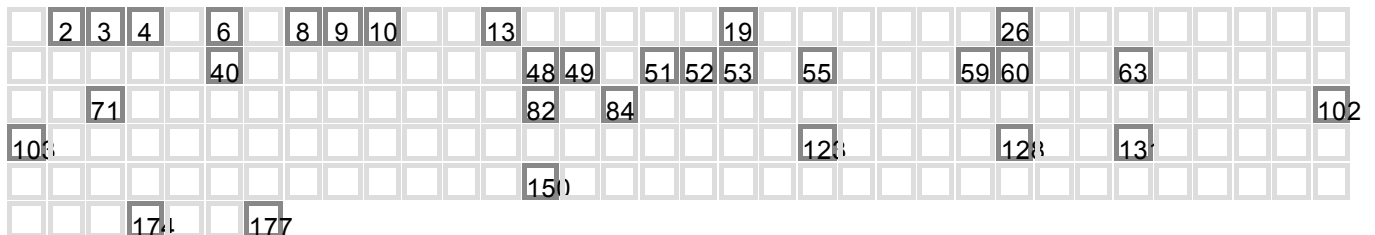

Synonyms: ENSG00000069667; ENSP00000261523; ENSP00000309753; ENSP00000335087; ENSP00000402971; ENSP00000449482; ENSP00000453322; 6095; RORA; NP\_002934; NP\_599022; NP\_599023; NP\_599024; NM\_002943; NM\_134260; NM\_134261; NM\_134262; NR1F1; ROR3; RZRA; P35398; RORA\_HUMAN;

More at [Entrez](#)

RORC RAR-related orphan receptor C [Source:HGNC Symbol;Acc:10260]

3.20

Functions:

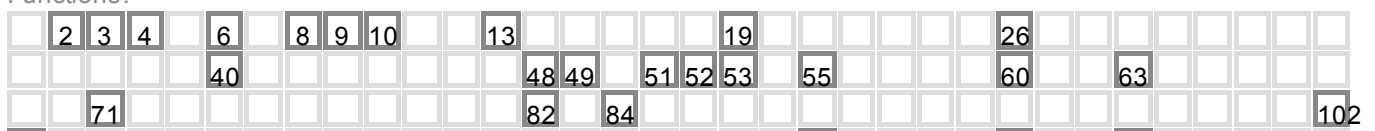

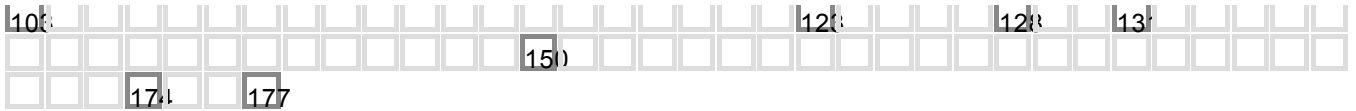

Synonyms: ENSG00000143365; ENSP00000327025; ENSP00000349164; ENSP00000376461; 6097; RORC; NP\_001001523; NP\_005051; NM\_001001523; NM\_005060; NR1F3; RORG; RZRG; TOR; P51449; RORG\_HUMAN;

More at [Entrez](#)

**NR2C2** nuclear receptor subfamily 2, group C, member 2 [Source:HGNC Symbol;Acc:7972] 3.19

Functions:

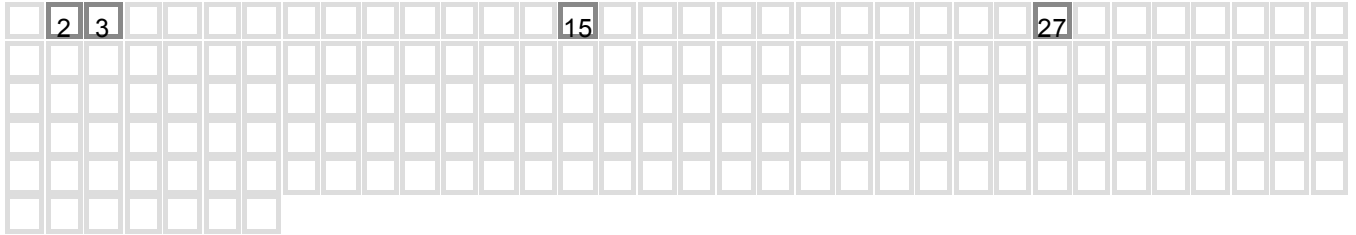

Synonyms: ENSG00000177463; ENSP00000320447; ENSP00000376814; ENSP00000384463; ENSP00000388387; ENSP00000391473; ENSP00000401807; ENSP00000402272; ENSP00000412473; ENSP00000413438; 7182; NR2C2; NP\_003289; NM\_003298; hTAK1; TR2R1; TR4; NR2C2\_HUMAN; P49116;

More at [Entrez](#)

**RXRG** retinoid X receptor, gamma [Source:HGNC Symbol;Acc:10479] 3.18

Functions:

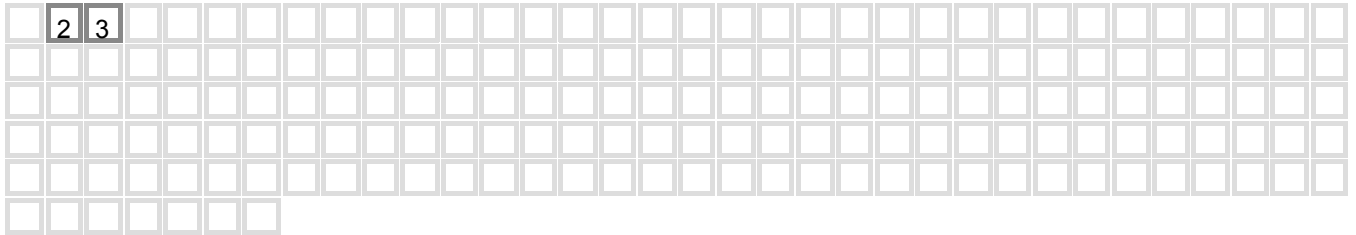

Synonyms: ENSG00000143171; ENSP00000352900; 6258; RXRG; NP\_001243499; NP\_001243500; NP\_008848; NM\_001256570; NM\_006917; NR2B3; P48443; RXRG\_HUMAN;

More at [Entrez](#)

**ESRRA** estrogen-related receptor alpha [Source:HGNC Symbol;Acc:3471] 3.18

Functions:

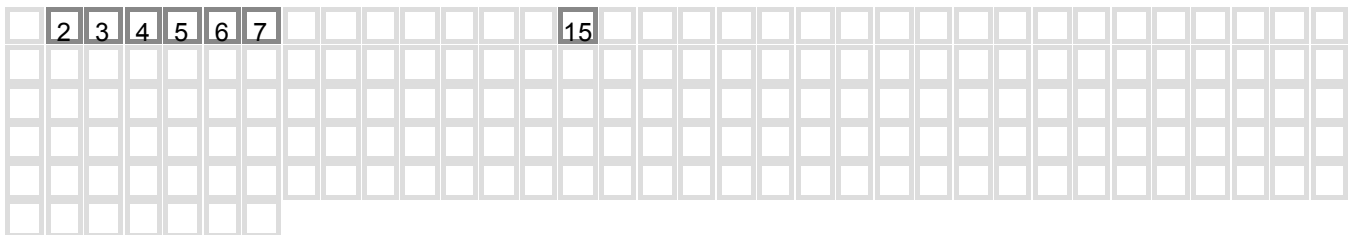

Synonyms: ENSG00000173153; ENSP00000000442; ENSP00000384851; ENSP00000385971; ENSP00000439896; ENSP00000441970; ENSP00000444710; 2101; ESRRA; NP\_001269379; NP\_001269380; NP\_004442; NM\_001282450; NM\_001282451; NM\_004451; ERR1; ERRa; ERRalpha; ESRL1; NR3B1; ERR1\_HUMAN; P11474;

More at [Entrez](#)

**NR1D2** nuclear receptor subfamily 1, group D, member 2 [Source:HGNC Symbol;Acc:7963] 3.16

Functions:

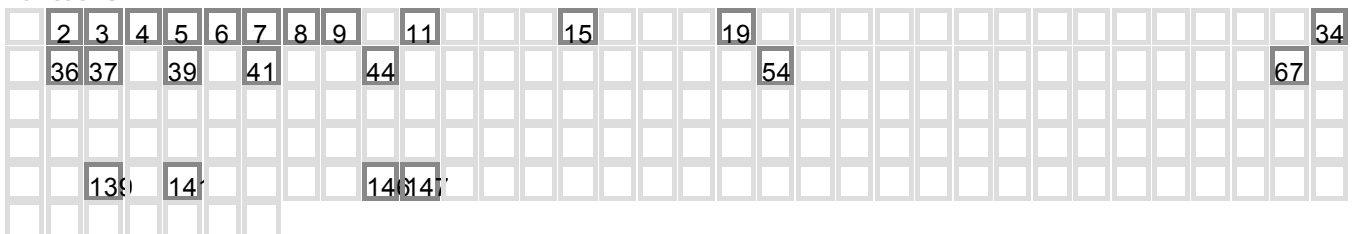

Synonyms: ENSG00000174738; ENSP00000310006; ENSP00000373283; 9975; NR1D2; NP\_001138897; NP\_005117; NM\_001145425; NM\_005126; BD73; EAR-1r; Hs.37288; RVR; NR1D2\_HUMAN; Q14995;

More at [Entrez](#)

RARG retinoic acid receptor, gamma [Source:HGNC Symbol;Acc:9866]

3.16

Functions:

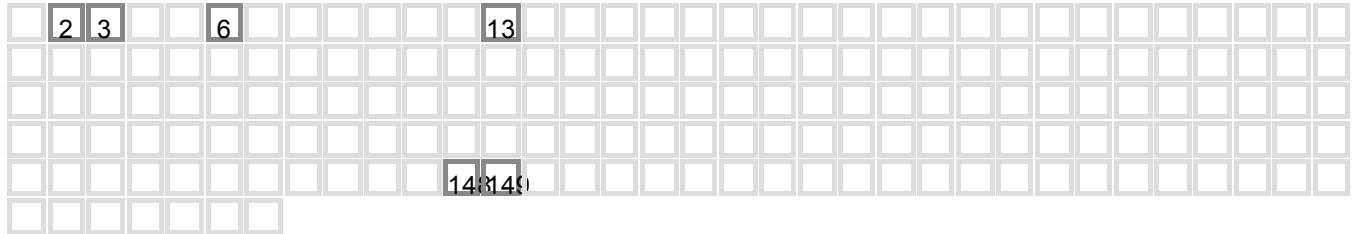

Synonyms: ENSG00000172819; ENSP00000332695; ENSP00000343698; ENSP00000377947; ENSP00000388510; ENSP00000444335; ENSP00000454385; ENSP00000454417; ENSP00000454604; 5916; RARG; NP\_000957; NP\_001036193; NP\_001230659; NP\_001230660; NP\_001230661; NM\_000966; NM\_001042728; NM\_001243730; NM\_001243731; NM\_001243732; NR1B3; RARC; P13631; RARG\_HUMAN;

More at [Entrez](#)

RARB retinoic acid receptor, beta [Source:HGNC Symbol;Acc:9865]

3.15

Functions:

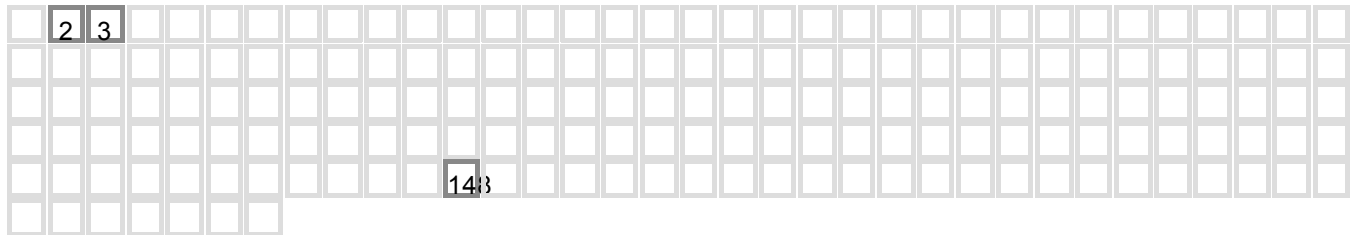

Synonyms: ENSG00000077092; ENSP00000332296; ENSP00000373282; ENSP00000385865; ENSP00000391391; ENSP00000398840; 5915; RARB; NP\_000956; NP\_057236; NM\_000965; NM\_016152; NR1B2; RRB2; P10826; RARB\_HUMAN;

More at [Entrez](#)

PGR progesterone receptor [Source:HGNC Symbol;Acc:8910]

3.14

Functions:

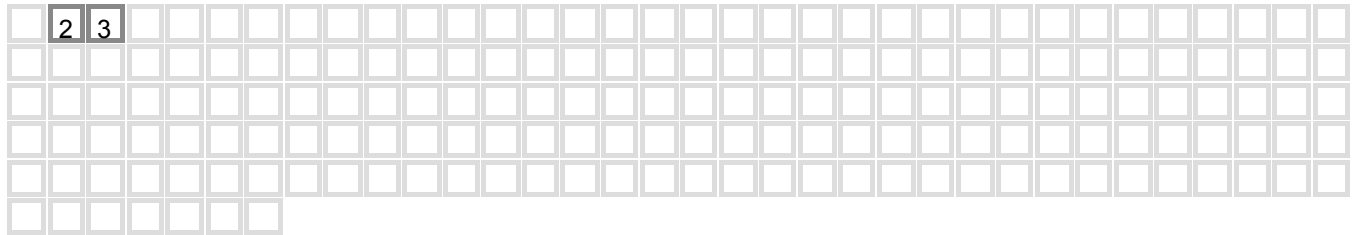

Synonyms: ENSG00000082175; ENSP00000263463; ENSP00000325120; ENSP00000432352; ENSP00000432914; ENSP00000436561; ENSP00000436803; 5241; PGR; NP\_000917; NP\_001189403; NP\_001258090; NP\_001258091; NM\_000926; NM\_001202474; NM\_001271161; NM\_001271162; NR3C3; P06401; PRGR\_HUMAN;

More at [Entrez](#)

ESRRG estrogen-related receptor gamma [Source:HGNC Symbol;Acc:3474]

3.14

Functions:

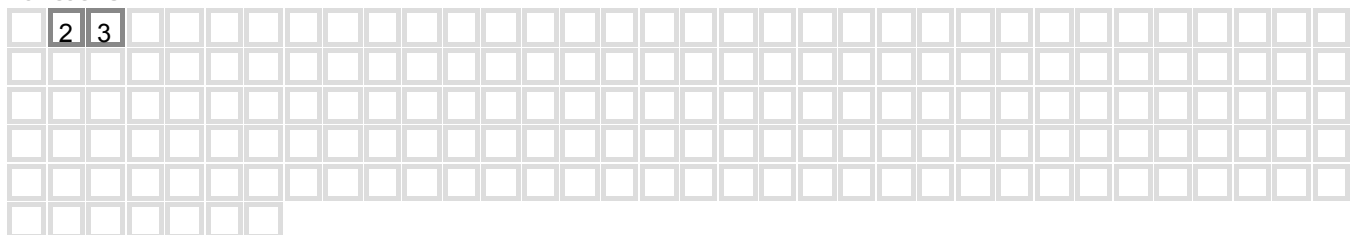

Synonyms: ENSG00000196482; ENSP00000352077; ENSP00000353108; ENSP00000354584; ENSP00000355225; ENSP00000355904; ENSP00000355905; ENSP00000355907; ENSP00000375761;





## Functions

| Function                                                                                         | FDR      | Coverage |
|--------------------------------------------------------------------------------------------------|----------|----------|
| 1 query genes                                                                                    | n/a      | 29 / 29  |
| 2 transcription initiation from RNA polymerase II promoter                                       | 8.83E-36 | 26 / 189 |
| 3 DNA-templated transcription, initiation                                                        | 1.04E-34 | 26 / 212 |
| 4 direct ligand regulated sequence-specific DNA binding transcription factor activity            | 4.74E-30 | 16 / 35  |
| 5 ligand-activated sequence-specific DNA binding RNA polymerase II transcription factor activity | 2.24E-25 | 14 / 33  |
| 6 intracellular receptor signaling pathway                                                       | 6.92E-15 | 15 / 206 |
| 7 sequence-specific DNA binding RNA polymerase II transcription factor activity                  | 1.51E-13 | 14 / 199 |
| 8 circadian rhythm                                                                               | 2.62E-6  | 6 / 42   |
| 9 regulation of circadian rhythm                                                                 | 9.8E-6   | 5 / 25   |
| 10 steroid binding                                                                               | 9.8E-6   | 6 / 54   |
| 11 regulation of lipid metabolic process                                                         | 1.34E-5  | 8 / 162  |
| 12 regulation of macrophage derived foam cell differentiation                                    | 1.41E-5  | 5 / 28   |
| 13 response to lipid                                                                             | 1.66E-5  | 9 / 248  |
| 14 foam cell differentiation                                                                     | 1.66E-5  | 5 / 31   |
| 15 sequence-specific DNA binding                                                                 | 1.66E-5  | 9 / 254  |
| 16 steroid hormone receptor activity                                                             | 1.66E-5  | 4 / 11   |
| 17 macrophage derived foam cell differentiation                                                  | 1.66E-5  | 5 / 31   |
| 18 regulation of cholesterol storage                                                             | 2.02E-5  | 4 / 12   |
| 19 rhythmic process                                                                              | 2.21E-5  | 6 / 69   |
| 20 cholesterol storage                                                                           | 2.48E-5  | 4 / 13   |
| 21 negative regulation of macrophage derived foam cell differentiation                           | 2.48E-5  | 4 / 13   |
| 22 positive regulation of lipase activity                                                        | 3.99E-5  | 6 / 78   |
| 23 negative regulation of lipid storage                                                          | 5.71E-5  | 4 / 16   |
| 24 regulation of receptor biosynthetic process                                                   | 9.14E-5  | 4 / 18   |
| 25 regulation of innate immune response                                                          | 1.3E-4   | 8 / 243  |
| 26 regulation of fat cell differentiation                                                        | 1.5E-4   | 5 / 52   |
| 27 transcription coactivator activity                                                            | 1.5E-4   | 8 / 249  |
| 28 receptor biosynthetic process                                                                 | 1.51E-4  | 4 / 21   |
| 29 positive regulation of MAPK cascade                                                           | 1.51E-4  | 8 / 253  |
| 30 regulation of lipase activity                                                                 | 1.53E-4  | 6 / 103  |
| 31 phosphatidylinositol-mediated signaling                                                       | 1.56E-4  | 7 / 173  |
| 32 regulation of interferon-gamma-mediated signaling pathway                                     | 1.56E-4  | 4 / 22   |
| 33 inositol lipid-mediated signaling                                                             | 1.56E-4  | 7 / 173  |
| 34 regulatory region DNA binding                                                                 | 1.78E-4  | 8 / 267  |
| 35 regulation of response to interferon-gamma                                                    | 1.78E-4  | 4 / 23   |
| 36 transcription regulatory region DNA binding                                                   | 1.78E-4  | 8 / 266  |
| 37 regulatory region nucleic acid binding                                                        | 1.78E-4  | 8 / 267  |
| 38 cellular response to vascular endothelial growth factor stimulus                              | 1.95E-4  | 4 / 24   |
| 39 inflammatory response                                                                         | 2.55E-4  | 8 / 282  |
| 40 regulation of glucose metabolic process                                                       | 2.59E-4  | 5 / 63   |
| 41 core promoter sequence-specific DNA binding                                                   | 2.59E-4  | 4 / 26   |
| 42 phosphatidylinositol 3-kinase signaling                                                       | 3.71E-4  | 5 / 68   |
| 43 fatty acid metabolic process                                                                  | 4.12E-4  | 7 / 209  |
| 44 lipid homeostasis                                                                             | 4.12E-4  | 5 / 70   |
|                                                                                                  | 5.21E-4  | 6 / 136  |

|    |                                                                 |         |         |
|----|-----------------------------------------------------------------|---------|---------|
| 45 | positive regulation of MAP kinase activity                      |         |         |
| 46 | positive regulation of lipid metabolic process                  | 6.71E-4 | 5 / 78  |
| 47 | regulation of lipid storage                                     | 6.72E-4 | 4 / 34  |
| 48 | hemopoiesis                                                     | 7.56E-4 | 7 / 232 |
| 49 | regulation of cellular carbohydrate metabolic process           | 7.59E-4 | 5 / 81  |
| 50 | vascular endothelial growth factor receptor signaling pathway   | 8.94E-4 | 4 / 37  |
| 51 | fat cell differentiation                                        | 9.81E-4 | 5 / 86  |
| 52 | regulation of carbohydrate metabolic process                    | 1.02E-3 | 5 / 87  |
| 53 | glucose metabolic process                                       | 1.12E-3 | 6 / 161 |
| 54 | transcription regulatory region sequence-specific DNA binding   | 1.12E-3 | 5 / 90  |
| 55 | hematopoietic or lymphoid organ development                     | 1.12E-3 | 7 / 250 |
| 56 | positive regulation of phosphatidylinositol 3-kinase signaling  | 1.12E-3 | 4 / 40  |
| 57 | pinocytosis                                                     | 1.14E-3 | 3 / 12  |
| 58 | lipid storage                                                   | 1.42E-3 | 4 / 43  |
| 59 | negative regulation of cell differentiation                     | 1.49E-3 | 7 / 266 |
| 60 | immune system development                                       | 1.49E-3 | 7 / 266 |
| 61 | protein tyrosine kinase activity                                | 1.56E-3 | 5 / 98  |
| 62 | toll-like receptor 4 signaling pathway                          | 1.99E-3 | 5 / 104 |
| 63 | hexose metabolic process                                        | 1.99E-3 | 6 / 182 |
| 64 | positive regulation of protein serine/threonine kinase activity | 1.99E-3 | 6 / 182 |
| 65 | regulation of phosphatidylinositol 3-kinase signaling           | 2.15E-3 | 4 / 49  |
| 66 | transmembrane receptor protein tyrosine kinase activity         | 2.26E-3 | 4 / 50  |
| 67 | core promoter binding                                           | 2.26E-3 | 4 / 50  |
| 68 | regulation of MAP kinase activity                               | 2.44E-3 | 6 / 191 |
| 69 | positive regulation of fatty acid metabolic process             | 2.89E-3 | 3 / 17  |
| 70 | regulation of lipid transport                                   | 3.17E-3 | 4 / 55  |
| 71 | monosaccharide metabolic process                                | 3.85E-3 | 6 / 209 |
| 72 | drug binding                                                    | 3.85E-3 | 4 / 58  |
| 73 | monocarboxylic acid biosynthetic process                        | 4.1E-3  | 5 / 124 |
| 74 | regulation of cellular ketone metabolic process                 | 4.89E-3 | 5 / 129 |
| 75 | toll-like receptor signaling pathway                            | 5.8E-3  | 5 / 134 |
| 76 | transmembrane receptor protein kinase activity                  | 5.96E-3 | 4 / 66  |
| 77 | positive regulation of defense response                         | 5.96E-3 | 6 / 228 |
| 78 | positive regulation of phospholipase activity                   | 8.3E-3  | 4 / 72  |
| 79 | interferon-gamma-mediated signaling pathway                     | 8.54E-3 | 4 / 73  |
| 80 | lipid transport                                                 | 8.54E-3 | 5 / 147 |
| 81 | protein autophosphorylation                                     | 8.82E-3 | 5 / 149 |
| 82 | cellular response to lipid                                      | 8.82E-3 | 5 / 149 |
| 83 | regulation of sterol transport                                  | 9.96E-3 | 3 / 27  |
| 84 | cellular carbohydrate metabolic process                         | 9.96E-3 | 5 / 154 |
| 85 | regulation of cholesterol transport                             | 9.96E-3 | 3 / 27  |
| 86 | pattern recognition receptor signaling pathway                  | 1.02E-2 | 5 / 155 |
| 87 | regulation of lipid biosynthetic process                        | 1.03E-2 | 4 / 79  |
| 88 | regulation of phospholipase activity                            | 1.03E-2 | 4 / 79  |
| 89 | innate immune response-activating signal transduction           | 1.03E-2 | 5 / 157 |
| 90 | negative regulation of cytokine-mediated signaling pathway      | 1.03E-2 | 3 / 28  |
| 91 | growth factor binding                                           | 1.03E-2 | 4 / 79  |
| 92 | regulation of cytokine-mediated signaling pathway               | 1.12E-2 | 4 / 81  |

|     |                                                          |         |         |
|-----|----------------------------------------------------------|---------|---------|
| 93  | activation of innate immune response                     | 1.26E-2 | 5 / 165 |
| 94  | response to bacterium                                    | 1.27E-2 | 5 / 166 |
| 95  | cellular ketone metabolic process                        | 1.27E-2 | 5 / 166 |
| 96  | collagen metabolic process                               | 1.35E-2 | 4 / 86  |
| 97  | regulation of response to cytokine stimulus              | 1.4E-2  | 4 / 87  |
| 98  | negative regulation of response to cytokine stimulus     | 1.44E-2 | 3 / 32  |
| 99  | cellular response to interferon-gamma                    | 1.48E-2 | 4 / 89  |
| 100 | response to lipopolysaccharide                           | 1.48E-2 | 4 / 89  |
| 101 | multicellular organismal macromolecule metabolic process | 1.52E-2 | 4 / 90  |
| 102 | cellular response to alcohol                             | 1.52E-2 | 3 / 33  |
| 103 | sterol binding                                           | 1.64E-2 | 3 / 34  |
| 104 | protein serine/threonine kinase activity                 | 1.66E-2 | 6 / 290 |
| 105 | regulation of protein serine/threonine kinase activity   | 1.7E-2  | 6 / 292 |
| 106 | positive regulation of lipid biosynthetic process        | 1.73E-2 | 3 / 35  |
| 107 | placenta development                                     | 1.73E-2 | 3 / 35  |
| 108 | receptor metabolic process                               | 1.77E-2 | 4 / 95  |
| 109 | carboxylic acid biosynthetic process                     | 1.79E-2 | 5 / 184 |
| 110 | organic acid biosynthetic process                        | 1.79E-2 | 5 / 184 |
| 111 | multicellular organismal metabolic process               | 1.79E-2 | 4 / 96  |
| 112 | positive regulation of cell-substrate adhesion           | 1.8E-2  | 3 / 36  |
| 113 | positive regulation of innate immune response            | 1.92E-2 | 5 / 188 |
| 114 | response to molecule of bacterial origin                 | 2.05E-2 | 4 / 100 |
| 115 | steroid metabolic process                                | 2.3E-2  | 5 / 196 |
| 116 | monocarboxylic acid binding                              | 2.38E-2 | 3 / 40  |
| 117 | response to interferon-gamma                             | 2.41E-2 | 4 / 105 |
| 118 | peptidyl-tyrosine modification                           | 3.06E-2 | 5 / 210 |
| 119 | peptidyl-tyrosine phosphorylation                        | 3.06E-2 | 5 / 210 |
| 120 | fatty acid transport                                     | 3.28E-2 | 3 / 45  |
| 121 | regulation of steroid metabolic process                  | 3.47E-2 | 3 / 46  |
| 122 | regulation of fatty acid metabolic process               | 4.15E-2 | 3 / 49  |
| 123 | cellular response to sterol                              | 4.29E-2 | 2 / 10  |
| 124 | cholesterol homeostasis                                  | 4.29E-2 | 3 / 50  |
| 125 | MAP kinase activity                                      | 4.29E-2 | 2 / 10  |
| 126 | 3'-UTR-mediated mRNA stabilization                       | 4.29E-2 | 2 / 10  |
| 127 | sterol homeostasis                                       | 4.29E-2 | 3 / 50  |
| 128 | alcohol binding                                          | 4.42E-2 | 3 / 51  |
| 129 | arachidonic acid metabolic process                       | 4.42E-2 | 3 / 51  |
| 130 | positive regulation of cholesterol transport             | 4.89E-2 | 2 / 11  |
| 131 | T-helper 17 type immune response                         | 4.89E-2 | 2 / 11  |
| 132 | regulation of sequestering of triglyceride               | 4.89E-2 | 2 / 11  |
| 133 | regulation of toll-like receptor 4 signaling pathway     | 4.89E-2 | 2 / 11  |
| 134 | positive regulation of sterol transport                  | 4.89E-2 | 2 / 11  |
| 135 | peptidyl-glutamic acid carboxylation                     | 4.89E-2 | 2 / 11  |
| 136 | protein carboxylation                                    | 4.89E-2 | 2 / 11  |
| 137 | cholesterol transport                                    | 5.17E-2 | 3 / 55  |
| 138 | sterol transport                                         | 5.17E-2 | 3 / 55  |
| 139 | regulation of striated muscle tissue development         | 5.41E-2 | 3 / 56  |
| 140 | histone kinase activity                                  | 5.49E-2 | 2 / 12  |
| 141 | regulation of muscle tissue development                  | 5.49E-2 | 3 / 57  |

|     |                                                          |         |         |
|-----|----------------------------------------------------------|---------|---------|
| 142 | regulation of triglyceride biosynthetic process          | 5.49E-2 | 2 / 12  |
| 143 | regulation of cholesterol metabolic process              | 5.49E-2 | 2 / 12  |
| 144 | regulation of nitric-oxide synthase biosynthetic process | 5.49E-2 | 2 / 12  |
| 145 | nitric-oxide synthase biosynthetic process               | 5.49E-2 | 2 / 12  |
| 146 | regulation of muscle organ development                   | 5.71E-2 | 3 / 58  |
| 147 | regulation of inflammatory response                      | 5.75E-2 | 4 / 140 |
| 148 | embryonic organ development                              | 6.27E-2 | 4 / 144 |
| 149 | retinoic acid receptor binding                           | 6.27E-2 | 2 / 13  |
| 150 | circadian regulation of gene expression                  | 6.27E-2 | 2 / 13  |
| 151 | positive regulation of phospholipase C activity          | 6.72E-2 | 3 / 62  |
| 152 | regulation of phospholipase C activity                   | 7E-2    | 3 / 63  |
| 153 | sequestering of triglyceride                             | 7.01E-2 | 2 / 14  |
| 154 | positive regulation of triglyceride metabolic process    | 7.01E-2 | 2 / 14  |
| 155 | MAP kinase kinase activity                               | 7.01E-2 | 2 / 14  |
| 156 | regulation of cholesterol efflux                         | 7.01E-2 | 2 / 14  |
| 157 | toll-like receptor 5 signaling pathway                   | 7.33E-2 | 3 / 65  |
| 158 | toll-like receptor 10 signaling pathway                  | 7.33E-2 | 3 / 65  |
| 159 | collagen catabolic process                               | 7.33E-2 | 3 / 65  |
| 160 | neurotrophin TRK receptor signaling pathway              | 7.7E-2  | 5 / 274 |
| 161 | neurotrophin signaling pathway                           | 8.03E-2 | 5 / 277 |
| 162 | icosanoid metabolic process                              | 8.46E-2 | 3 / 69  |
| 163 | cholesterol metabolic process                            | 8.46E-2 | 3 / 69  |
| 164 | fatty acid derivative metabolic process                  | 8.46E-2 | 3 / 69  |
| 165 | toll-like receptor TLR6:TLR2 signaling pathway           | 8.98E-2 | 3 / 71  |
| 166 | toll-like receptor TLR1:TLR2 signaling pathway           | 8.98E-2 | 3 / 71  |
| 167 | endopeptidase activity                                   | 8.98E-2 | 4 / 163 |
| 168 | multicellular organismal catabolic process               | 8.98E-2 | 3 / 71  |
| 169 | Fc-epsilon receptor signaling pathway                    | 9.4E-2  | 4 / 166 |
| 170 | fibroblast growth factor binding                         | 9.4E-2  | 2 / 17  |
| 171 | toll-like receptor 9 signaling pathway                   | 9.4E-2  | 3 / 73  |
| 172 | histone phosphorylation                                  | 9.4E-2  | 2 / 17  |
| 173 | cellular response to biotic stimulus                     | 9.4E-2  | 3 / 73  |
| 174 | response to sterol                                       | 9.4E-2  | 2 / 17  |
| 175 | long-chain fatty acid metabolic process                  | 9.99E-2 | 3 / 75  |
| 176 | regulation of cell-substrate adhesion                    | 9.99E-2 | 3 / 75  |
| 177 | response to alcohol                                      | 9.99E-2 | 3 / 75  |

## Interactions

| Gene 1   | Gene 2   | Weight               | Network group | Networks                                                             |
|----------|----------|----------------------|---------------|----------------------------------------------------------------------|
| MMP12    | MMP3     | 0.043236750178039074 | Co-expression | Arijs-Rutgeerts-2009<br>Boldrick-Relman-2002<br>Ramaswamy-Golub-2001 |
| RXRB     | CDK9     | 0.03211466781795025  | Co-expression | Alizadeh-Staudt-2000<br>Boldrick-Relman-2002                         |
| NR1D2    | NR2C2    | 0.03163459897041321  | Co-expression | Ramaswamy-Golub-2001                                                 |
| KDR      | FLT1     | 0.030316736549139023 | Co-expression | Arijs-Rutgeerts-2009<br>Roth-Zlotnik-2006                            |
| NR1D1    | FGFR2    | 0.025683493353426456 | Co-expression | Alizadeh-Staudt-2000<br>Boldrick-Relman-2002                         |
| NR1D2    | NR1H2    | 0.02265908569097519  | Co-expression | Rieger-Chu-2004                                                      |
| NR1H3    | PPARG    | 0.022533847019076347 | Co-expression | Gysin-McMahon-2012<br>Roth-Zlotnik-2006                              |
| NR1D2    | GSK3B    | 0.021795935928821564 | Co-expression | Wu-Garvey-2007                                                       |
| EPHX2    | PPARA    | 0.021765772253274918 | Co-expression | Arijs-Rutgeerts-2009<br>Roth-Zlotnik-2006                            |
| NR1I3    | NR1I2    | 0.021289569325745106 | Co-expression | Rieger-Chu-2004<br>Roth-Zlotnik-2006                                 |
| NR1I2    | PPARG    | 0.02123275212943554  | Co-expression | Kang-Willman-2010                                                    |
| PPARG    | THRB     | 0.021227585151791573 | Co-expression | Kang-Willman-2010                                                    |
| MAPK10   | PIK3CG   | 0.020742544904351234 | Co-expression | Alizadeh-Staudt-2000                                                 |
| RXRB     | NR1H2    | 0.01992536336183548  | Co-expression | Gysin-McMahon-2012                                                   |
| RARG     | FGFR2    | 0.019609088078141212 | Co-expression | Ramaswamy-Golub-2001                                                 |
| RARG     | JAK2     | 0.01916118524968624  | Co-expression | Gysin-McMahon-2012                                                   |
| MAPKAPK2 | NR1H2    | 0.0183554720133543   | Co-expression | Wu-Garvey-2007                                                       |
| MAPK14   | LTA4H    | 0.018249066546559334 | Co-expression | Roth-Zlotnik-2006                                                    |
| RXRB     | MAPK14   | 0.017710430547595024 | Co-expression | Alizadeh-Staudt-2000                                                 |
| MAPK10   | MMP12    | 0.01747087761759758  | Co-expression | Wu-Garvey-2007                                                       |
| ESRRG    | RORA     | 0.017252985388040543 | Co-expression | Cheok-Evans-2003                                                     |
| MAPK10   | FGFR1    | 0.017057158052921295 | Co-expression | Gysin-McMahon-2012                                                   |
| RORC     | PPARD    | 0.017010711133480072 | Co-expression | Wu-Garvey-2007                                                       |
| NR2C2    | MAPK10   | 0.01682709902524948  | Co-expression | Wu-Garvey-2007                                                       |
| CDK9     | EPHX2    | 0.01647859998047352  | Co-expression | Rieger-Chu-2004                                                      |
| PLA2G2A  | MMP3     | 0.01639402285218239  | Co-expression | Alizadeh-Staudt-2000                                                 |
| DPYD     | MMP13    | 0.016266196966171265 | Co-expression | Ramaswamy-Golub-2001                                                 |
| PIK3CG   | PPARG    | 0.016093742102384567 | Co-expression | Wu-Garvey-2007                                                       |
| PGR      | FGFR2    | 0.014344998635351658 | Co-expression | Ramaswamy-Golub-2001                                                 |
| MAPK14   | CDK9     | 0.014261950738728046 | Co-expression | Ramaswamy-Golub-2001                                                 |
| RARB     | MAPK10   | 0.014128590933978558 | Co-expression | Gysin-McMahon-2012                                                   |
| CA1      | THRB     | 0.014084487222135067 | Co-expression | Arijs-Rutgeerts-2009                                                 |
| KDR      | REN      | 0.013823027722537518 | Co-expression | Smirnov-Cheung-2009                                                  |
| ESRRA    | MAPKAPK2 | 0.01348874345421791  | Co-expression | Wu-Garvey-2007                                                       |
| MAPK10   | F2       | 0.013400968164205551 | Co-expression | Ramaswamy-Golub-2001                                                 |
| MAPK10   | F10      | 0.012979976832866669 | Co-expression | Gysin-McMahon-2012                                                   |
| NR1I3    | NR1H2    | 0.01281662192195654  | Co-expression | Perou-Botstein-1999                                                  |
| NR1D2    | MAPKAPK2 | 0.012671624310314655 | Co-expression | Kang-Willman-2010                                                    |
| NR1H3    | MMP12    | 0.012486720457673073 | Co-expression | Ramaswamy-Golub-2001                                                 |
| RORC     | NR1I3    | 0.01219329982995987  | Co-expression | Roth-Zlotnik-2006                                                    |
| CDK9     | PIK3CG   | 0.012154494412243366 | Co-expression | Cheok-Evans-2003                                                     |
| FLT1     | THRB     | 0.012036114931106567 | Co-expression | Ramaswamy-Golub-2001                                                 |
| RARB     | ESRRA    | 0.011722870171070099 | Co-expression | Cheok-Evans-2003                                                     |
| F2       | MMP3     | 0.011672643013298512 | Co-expression | Kang-Willman-2010                                                    |
| PIK3CG   | NR1H4    | 0.011357635259628296 | Co-expression | Ramaswamy-Golub-2001                                                 |
| KDR      | FGFR1    | 0.011164223775267601 | Co-expression | Alizadeh-Staudt-2000                                                 |
| NR1H3    | PLA2G2A  | 0.010994229465723038 | Co-expression | Alizadeh-Staudt-2000                                                 |

|          |          |                       |                      |                                     |
|----------|----------|-----------------------|----------------------|-------------------------------------|
| NR2C1    | PIK3CG   | 0.010694886557757854  | Co-expression        | Ramaswamy-Golub-2001                |
| ESR1     | KDR      | 0.010648923926055431  | Co-expression        | Alizadeh-Staudt-2000                |
| KDR      | MMP3     | 0.010643739253282547  | Co-expression        | Alizadeh-Staudt-2000                |
| RXR      | DHODH    | 0.010622811503708363  | Co-expression        | Perou-Botstein-1999                 |
| ESRRG    | DPYD     | 0.009727969765663147  | Co-expression        | Arijs-Rutgeerts-2009                |
| CDK2     | GSK3B    | 0.009701027534902096  | Co-expression        | Alizadeh-Staudt-2000                |
| KDR      | PPARD    | 0.009465987794101238  | Co-expression        | Perou-Botstein-1999                 |
| NR1I2    | MMP13    | 0.009203195571899414  | Co-expression        | Wu-Garvey-2007                      |
| NR1H3    | REN      | 0.008947978727519512  | Co-expression        | Rieger-Chu-2004                     |
| CDK2     | MAPK14   | 0.008813655935227871  | Co-expression        | Alizadeh-Staudt-2000                |
| ESRRA    | EPHX2    | 0.008711691945791245  | Co-expression        | Arijs-Rutgeerts-2009                |
| PGR      | MMP12    | 0.008544520009309053  | Co-expression        | Kang-Willman-2010<br>Wu-Garvey-2007 |
| NR2C2    | ESR1     | 0.008530636318027973  | Co-expression        | Perou-Botstein-1999                 |
| ESR1     | CA1      | 0.008343247696757317  | Co-expression        | Gysin-McMahon-2012                  |
| NR1I2    | EPHX2    | 0.0082744425162673    | Co-expression        | Arijs-Rutgeerts-2009                |
| MAPKAPK2 | ESR1     | 0.008247756399214268  | Co-expression        | Perou-Botstein-1999                 |
| KDR      | F10      | 0.008109210059046745  | Co-expression        | Perou-Botstein-1999                 |
| PGR      | KDR      | 0.007630572654306889  | Co-expression        | Wu-Garvey-2007                      |
| F10      | FGFR2    | 0.007585418876260519  | Co-expression        | Wu-Garvey-2007                      |
| PLA2G2A  | F10      | 0.007522277068346739  | Co-expression        | Wu-Garvey-2007                      |
| NR1I2    | F2       | 0.007515043020248413  | Co-expression        | Roth-Zlotnik-2006                   |
| REN      | CA1      | 0.007287074811756611  | Co-expression        | Rieger-Chu-2004                     |
| MAPK14   | PIK3CG   | 0.007059122435748577  | Co-expression        | Boldrick-Relman-2002                |
| PGR      | MAPK10   | 0.006829873658716679  | Co-expression        | Wu-Garvey-2007                      |
| F2       | F10      | 0.006107615306973457  | Co-expression        | Roth-Zlotnik-2006                   |
| CDK9     | FGFR2    | 0.006060219369828701  | Co-expression        | Boldrick-Relman-2002                |
| NR1I2    | REN      | 0.005140224471688271  | Co-expression        | Rieger-Chu-2004                     |
| NR1I3    | F2       | 0.005070996005088091  | Co-expression        | Roth-Zlotnik-2006                   |
| EPHX2    | LTA4H    | 0.004831915255635977  | Co-expression        | Arijs-Rutgeerts-2009                |
| PGR      | NR2C2    | 0.0046678646467626095 | Co-expression        | Wu-Garvey-2007                      |
| ESR2     | MMP12    | 0.004125125706195831  | Co-expression        | Kang-Willman-2010                   |
| NR1H3    | KDR      | 0.004100181628018618  | Co-expression        | Ramaswamy-Golub-2001                |
| PGR      | MMP3     | 0.0038916515186429024 | Co-expression        | Wu-Garvey-2007                      |
| NR1H3    | DHODH    | 0.0038481594529002905 | Co-expression        | Boldrick-Relman-2002                |
| NR1D1    | NR1H3    | 0.0037995490711182356 | Co-expression        | Boldrick-Relman-2002                |
| MMP12    | PPARG    | 0.0014438159996643662 | Co-expression        | Kang-Willman-2010                   |
| MMP12    | MMP13    | 0.0012650575954467058 | Co-expression        | Kang-Willman-2010                   |
| PGR      | MMP3     | 0.02585810050368309   | Co-localization      | Johnson-Shoemaker-2003              |
| PGR      | ESR1     | 0.022514594718813896  | Co-localization      | Johnson-Shoemaker-2003              |
| NR2C2    | GSK3B    | 0.02153736539185047   | Co-localization      | Johnson-Shoemaker-2003              |
| RORA     | NR1H4    | 0.020591670647263527  | Co-localization      | Johnson-Shoemaker-2003              |
| ESR1     | MMP3     | 0.01997765526175499   | Co-localization      | Johnson-Shoemaker-2003              |
| NR1H3    | F10      | 0.019330978393554688  | Co-localization      | Johnson-Shoemaker-2003              |
| PLA2G2A  | MMP12    | 0.014045377261936665  | Co-localization      | Johnson-Shoemaker-2003              |
| ESR1     | REN      | 0.013943271711468697  | Co-localization      | Schadt-Shoemaker-2004               |
| ESR1     | F10      | 0.010013038292527199  | Co-localization      | Schadt-Shoemaker-2004               |
| PLA2G2A  | F10      | 0.007618853822350502  | Co-localization      | Schadt-Shoemaker-2004               |
| ESRRA    | PPARA    | 0.025752108544111252  | Genetic interactions | Lin-Smith-2010                      |
| RORC     | REN      | 0.006957837380468845  | Genetic interactions | Lin-Smith-2010                      |
| RORC     | MAPKAPK2 | 0.006427282001823187  | Genetic interactions | Lin-Smith-2010                      |
| RARG     | FGFR1    | 0.00400179298594594   | Genetic interactions | Lin-Smith-2010                      |
| PLA2G2A  | CA1      | 0.0032838573679327965 | Genetic interactions | Lin-Smith-2010                      |
| ESR2     | RXR      | 0.003167258109897375  | Genetic interactions | Lin-Smith-2010                      |
| KDR      | DHODH    | 0.0026649069041013718 | Genetic interactions | Lin-Smith-2010                      |
| GSK3B    | PPARA    | 0.002508551348000765  | Genetic interactions | Lin-Smith-2010                      |

|        |          |                       |                      |                |
|--------|----------|-----------------------|----------------------|----------------|
| PIK3CG | NR1H2    | 0.0024490407668054104 | Genetic interactions | Lin-Smith-2010 |
| GSK3B  | FGFR1    | 0.00235161860473454   | Genetic interactions | Lin-Smith-2010 |
| KDR    | F10      | 0.0022838159929960966 | Genetic interactions | Lin-Smith-2010 |
| PPARA  | NR1H4    | 0.0022201472893357277 | Genetic interactions | Lin-Smith-2010 |
| REN    | NR1H2    | 0.002202487550675869  | Genetic interactions | Lin-Smith-2010 |
| NR2C1  | GSK3B    | 0.002052635420113802  | Genetic interactions | Lin-Smith-2010 |
| CDK9   | NR1H2    | 0.0020062513649463654 | Genetic interactions | Lin-Smith-2010 |
| KDR    | F2       | 0.0019962212536484003 | Genetic interactions | Lin-Smith-2010 |
| MAPK10 | F2       | 0.0019184473203495145 | Genetic interactions | Lin-Smith-2010 |
| NR1H3  | FGFR2    | 0.0018740467494353652 | Genetic interactions | Lin-Smith-2010 |
| NR2C1  | NR1H2    | 0.0018494734540581703 | Genetic interactions | Lin-Smith-2010 |
| RARB   | PLA2G2A  | 0.0017488953890278935 | Genetic interactions | Lin-Smith-2010 |
| NR1D2  | RXRB     | 0.0016960856737568974 | Genetic interactions | Lin-Smith-2010 |
| NR1I2  | MAPKAPK2 | 0.0014395348262041807 | Genetic interactions | Lin-Smith-2010 |
| LTA4H  | PPARD    | 0.0012460262514650822 | Genetic interactions | Lin-Smith-2010 |
| NR1I2  | PPARD    | 0.00120081240311265   | Genetic interactions | Lin-Smith-2010 |
| NR1D2  | FGFR1    | 0.0011410964652895927 | Genetic interactions | Lin-Smith-2010 |
| MAPK10 | NR1H4    | 0.001121930661611259  | Genetic interactions | Lin-Smith-2010 |
| GSK3B  | FLT1     | 0.0010738756973296404 | Genetic interactions | Lin-Smith-2010 |
| PIK3CG | PPARG    | 0.0010691799689084291 | Genetic interactions | Lin-Smith-2010 |
| MMP3   | PPARD    | 0.001047093071974814  | Genetic interactions | Lin-Smith-2010 |
| RARB   | RXRG     | 0.0010351411765441298 | Genetic interactions | Lin-Smith-2010 |
| KDR    | MMP13    | 0.001004209159873426  | Genetic interactions | Lin-Smith-2010 |
| DPYD   | PLA2G2A  | 9.879310382530093E-4  | Genetic interactions | Lin-Smith-2010 |
| ESR2   | FLT1     | 9.730724850669503E-4  | Genetic interactions | Lin-Smith-2010 |
| NR1D1  | CDK9     | 9.660786017775536E-4  | Genetic interactions | Lin-Smith-2010 |
| MMP13  | PPARG    | 9.185090311802924E-4  | Genetic interactions | Lin-Smith-2010 |
| THRB   | NR1H4    | 9.121192852035165E-4  | Genetic interactions | Lin-Smith-2010 |
| FLT1   | PPARA    | 8.782998775132E-4     | Genetic interactions | Lin-Smith-2010 |
| DPYD   | PPARA    | 8.520803530700505E-4  | Genetic interactions | Lin-Smith-2010 |
| ESRRG  | GSK3B    | 8.354241726920009E-4  | Genetic interactions | Lin-Smith-2010 |
| REN    | THRB     | 8.213643450289965E-4  | Genetic interactions | Lin-Smith-2010 |
| NR1I2  | MAPK10   | 8.081633131951094E-4  | Genetic interactions | Lin-Smith-2010 |
| NR2C1  | PPARG    | 8.07426346000284E-4   | Genetic interactions | Lin-Smith-2010 |
| ESRRG  | PLA2G2A  | 7.922128424979746E-4  | Genetic interactions | Lin-Smith-2010 |
| MAPK10 | PPARD    | 7.784959161654115E-4  | Genetic interactions | Lin-Smith-2010 |
| ESRRG  | JAK2     | 7.748457137495279E-4  | Genetic interactions | Lin-Smith-2010 |
| RORA   | JAK2     | 7.618249510414898E-4  | Genetic interactions | Lin-Smith-2010 |
| ESRRG  | NR1H2    | 7.527371635660529E-4  | Genetic interactions | Lin-Smith-2010 |
| MAPK14 | EPHX2    | 7.498431950807571E-4  | Genetic interactions | Lin-Smith-2010 |
| ESRRG  | NR1H4    | 7.393768173642457E-4  | Genetic interactions | Lin-Smith-2010 |
| ESR1   | KDR      | 7.392543484456837E-4  | Genetic interactions | Lin-Smith-2010 |
| THRA   | FGFR2    | 7.299561984837055E-4  | Genetic interactions | Lin-Smith-2010 |
| PIK3CG | FGFR2    | 7.140024681575596E-4  | Genetic interactions | Lin-Smith-2010 |
| RARB   | MAPK14   | 6.774006760679185E-4  | Genetic interactions | Lin-Smith-2010 |
| NR1D2  | NR1D1    | 6.457331473939121E-4  | Genetic interactions | Lin-Smith-2010 |
| ESRRG  | FGFR1    | 6.405303720384836E-4  | Genetic interactions | Lin-Smith-2010 |
| ESRRG  | MMP13    | 6.360117695294321E-4  | Genetic interactions | Lin-Smith-2010 |
| NR2C2  | MAPK10   | 6.276679341681302E-4  | Genetic interactions | Lin-Smith-2010 |
| NR1D2  | MAPK10   | 6.151240668259561E-4  | Genetic interactions | Lin-Smith-2010 |
| RORA   | CDK9     | 5.962959257885814E-4  | Genetic interactions | Lin-Smith-2010 |
| RXRG   | THRB     | 5.784468376077712E-4  | Genetic interactions | Lin-Smith-2010 |
| EPHX2  | FGFR2    | 5.362827214412391E-4  | Genetic interactions | Lin-Smith-2010 |
| LTA4H  | FGFR2    | 5.329888663254678E-4  | Genetic interactions | Lin-Smith-2010 |
| NR1D2  | FLT1     | 5.210860981605947E-4  | Genetic interactions | Lin-Smith-2010 |
| ESRRG  | PPARD    | 5.130458157509565E-4  | Genetic interactions | Lin-Smith-2010 |
| MAPK10 | PPARG    | 4.986528656445444E-4  | Genetic interactions | Lin-Smith-2010 |

|        |        |                       |                      |                                                |
|--------|--------|-----------------------|----------------------|------------------------------------------------|
| RARB   | RORA   | 4.939031205140054E-4  | Genetic interactions | Lin-Smith-2010                                 |
| ESRRG  | ESR1   | 4.682037397287786E-4  | Genetic interactions | Lin-Smith-2010                                 |
| NR1D1  | FLT1   | 4.659265687223524E-4  | Genetic interactions | Lin-Smith-2010                                 |
| RXRG   | FGFR2  | 4.52214851975441E-4   | Genetic interactions | Lin-Smith-2010                                 |
| MAPK10 | THRB   | 4.259571142029017E-4  | Genetic interactions | Lin-Smith-2010                                 |
| DPYD   | PPARG  | 4.0981030906550586E-4 | Genetic interactions | Lin-Smith-2010                                 |
| NR2C2  | RORA   | 4.0669579175300896E-4 | Genetic interactions | Lin-Smith-2010                                 |
| NR1D2  | RORA   | 3.985680523328483E-4  | Genetic interactions | Lin-Smith-2010                                 |
| MAPK14 | FLT1   | 3.9443071000277996E-4 | Genetic interactions | Lin-Smith-2010                                 |
| DPYD   | MAPK14 | 3.826559113804251E-4  | Genetic interactions | Lin-Smith-2010                                 |
| MAPK14 | THRB   | 3.785380395129323E-4  | Genetic interactions | Lin-Smith-2010                                 |
| FLT1   | THRB   | 3.608383412938565E-4  | Genetic interactions | Lin-Smith-2010                                 |
| DPYD   | THRB   | 3.500663733575493E-4  | Genetic interactions | Lin-Smith-2010                                 |
| ESRRG  | MAPK10 | 3.4528691321611404E-4 | Genetic interactions | Lin-Smith-2010                                 |
| RORA   | MAPK10 | 3.3948459895327687E-4 | Genetic interactions | Lin-Smith-2010                                 |
| MAPK10 | FGFR2  | 3.3300233189947903E-4 | Genetic interactions | Lin-Smith-2010                                 |
| RORA   | PPARG  | 3.2310085953213274E-4 | Genetic interactions | Lin-Smith-2010                                 |
| FGFR2  | PPARG  | 3.1693142955191433E-4 | Genetic interactions | Lin-Smith-2010                                 |
| RORA   | MAPK14 | 3.0169193632900715E-4 | Genetic interactions | Lin-Smith-2010                                 |
| MAPK14 | FGFR2  | 2.9593126964755356E-4 | Genetic interactions | Lin-Smith-2010                                 |
| RORA   | FLT1   | 2.875853970181197E-4  | Genetic interactions | Lin-Smith-2010                                 |
| ESRRG  | DPYD   | 2.8376877889968455E-4 | Genetic interactions | Lin-Smith-2010                                 |
| RORA   | THRB   | 2.75997823337093E-4   | Genetic interactions | Lin-Smith-2010                                 |
| FGFR2  | THRB   | 2.70727789029479E-4   | Genetic interactions | Lin-Smith-2010                                 |
| ESRRG  | RORA   | 2.2372775129042566E-4 | Genetic interactions | Lin-Smith-2010                                 |
| ESRRG  | FGFR2  | 2.1945580374449492E-4 | Genetic interactions | Lin-Smith-2010                                 |
| RORA   | NR1D1  | 0.39692720770835876   | Pathway              | PATHWAYCOMMONS-<br>REACTOME                    |
| RXRG   | NR1H2  | 0.18449123203754425   | Pathway              | Wu-Stein-2010                                  |
| RXRG   | NR1H4  | 0.16041384637355804   | Pathway              | Wu-Stein-2010                                  |
| RXRG   | NR1H3  | 0.1473913937807083    | Pathway              | Wu-Stein-2010                                  |
| F2     | F10    | 0.1373298577964306    | Pathway              | PATHWAYCOMMONS-<br>REACTOME<br>Wu-Stein-2010   |
| RARG   | THRA   | 0.0932689756155014    | Pathway              | Wu-Stein-2010                                  |
| RARG   | THRB   | 0.08184022456407547   | Pathway              | Wu-Stein-2010                                  |
| RARB   | THRA   | 0.08164875954389572   | Pathway              | Wu-Stein-2010                                  |
| RARB   | THRB   | 0.0716438964009285    | Pathway              | Wu-Stein-2010                                  |
| RXRB   | NR1H2  | 0.055716972798109055  | Pathway              | Wu-Stein-2010                                  |
| RXRB   | NR1H4  | 0.04844552278518677   | Pathway              | Wu-Stein-2010                                  |
| NR1H3  | PPARG  | 0.045004721730947495  | Pathway              | Wu-Stein-2010                                  |
| RXRB   | NR1H3  | 0.04451269656419754   | Pathway              | Wu-Stein-2010                                  |
| ESRRA  | PPARA  | 0.043132755905389786  | Pathway              | Wu-Stein-2010                                  |
| NR1H3  | PPARA  | 0.03913494199514389   | Pathway              | Wu-Stein-2010                                  |
| MAPK14 | GSK3B  | 0.03789595514535904   | Pathway              | PATHWAYCOMMONS-<br>NCI_NATURE<br>Wu-Stein-2010 |
| KDR    | FLT1   | 0.03713475726544857   | Pathway              | PATHWAYCOMMONS-<br>NCI_NATURE<br>Wu-Stein-2010 |
| CDK2   | MAPK14 | 0.032336439937353134  | Pathway              | PATHWAYCOMMONS-<br>NCI_NATURE                  |
| RXRG   | PPARD  | 0.031032348051667213  | Pathway              | Wu-Stein-2010                                  |
| RARG   | RXRG   | 0.02518633008003235   | Pathway              | Wu-Stein-2010                                  |
| NR1D1  | PPARG  | 0.02288435585796833   | Pathway              | Wu-Stein-2010                                  |
| RARB   | RXRG   | 0.022048410028219223  | Pathway              | Wu-Stein-2010                                  |
| RXRG   | PPARG  | 0.015684736892580986  | Pathway              | Wu-Stein-2010                                  |
| RXRG   | PPARA  | 0.013639041222631931  | Pathway              | Wu-Stein-2010                                  |



|          |        |                       |                        |                                                                     |
|----------|--------|-----------------------|------------------------|---------------------------------------------------------------------|
| ESR2     | PPARG  | 0.012165921740233898  | Pathway                | Wu-Stein-2010                                                       |
| ESR2     | ESR1   | 0.01215824019163847   | Pathway                | PATHWAYCOMMONS-NCI_NATURE                                           |
| RARB     | RARG   | 0.010810628533363342  | Pathway                | Wu-Stein-2010                                                       |
| FGFR2    | FGFR1  | 0.010412666946649551  | Pathway                | Wu-Stein-2010                                                       |
| RXRB     | PPARD  | 0.00937187485396862   | Pathway                | Wu-Stein-2010                                                       |
| PIK3CG   | FLT1   | 0.008706091903150082  | Pathway                | Wu-Stein-2010                                                       |
| RARG     | RXRB   | 0.007606356870383024  | Pathway                | Wu-Stein-2010                                                       |
| KDR      | PIK3CG | 0.007380048278719187  | Pathway                | Wu-Stein-2010                                                       |
| PIK3CG   | FGFR2  | 0.007137341424822807  | Pathway                | Wu-Stein-2010                                                       |
| PIK3CG   | FGFR1  | 0.006896982900798321  | Pathway                | Wu-Stein-2010                                                       |
| RARB     | PPARG  | 0.006732297129929066  | Pathway                | Wu-Stein-2010                                                       |
| MAPKAPK2 | MAPK14 | 0.006674602162092924  | Pathway                | Wu-Stein-2010                                                       |
| RARB     | RXRB   | 0.006658694241195917  | Pathway                | Wu-Stein-2010                                                       |
| PGR      | MAPK14 | 0.006296984385699034  | Pathway                | Wu-Stein-2010                                                       |
| RXRB     | PPARG  | 0.004736843518912792  | Pathway                | Wu-Stein-2010                                                       |
| F2       | PPARA  | 0.004600238054990768  | Pathway                | Wu-Stein-2010                                                       |
| ESR1     | PPARG  | 0.004191082902252674  | Pathway                | Wu-Stein-2010                                                       |
| RXRB     | PPARA  | 0.004119036719202995  | Pathway                | Wu-Stein-2010                                                       |
| PIK3CG   | JAK2   | 0.004011406097561121  | Pathway                | Wu-Stein-2010                                                       |
| RARG     | MAPK14 | 0.0033220662735402584 | Pathway                | Wu-Stein-2010                                                       |
| MAPK14   | KDR    | 0.003208716632798314  | Pathway                | Wu-Stein-2010                                                       |
| RARB     | MAPK14 | 0.0029081758111715317 | Pathway                | Wu-Stein-2010                                                       |
| MAPK14   | F2     | 0.002285235794261098  | Pathway                | Wu-Stein-2010                                                       |
| MAPK14   | ESR1   | 0.0018104378832504153 | Pathway                | Wu-Stein-2010                                                       |
| MAPK14   | JAK2   | 0.0017440896481275558 | Pathway                | Wu-Stein-2010                                                       |
| NR2C2    | NR2C1  | 0.465468168258667     | Physical interactions  | IREF-OPHID                                                          |
| MAPK10   | DHODH  | 0.4099876582622528    | Physical interactions  | IREF-OPHID                                                          |
| CDK9     | FGFR1  | 0.29400432109832764   | Physical interactions  | Varjosalo-Gstaiger-2013 A                                           |
| RARB     | RXRG   | 0.2602044343948364    | Physical interactions  | IREF-OPHID                                                          |
| RXRB     | NR1H2  | 0.2161848545074463    | Physical interactions  | IREF-OPHID                                                          |
| RARB     | RXRB   | 0.2073972523212433    | Physical interactions  | IREF-OPHID                                                          |
| RXRB     | NR1I2  | 0.2013409435749054    | Physical interactions  | IREF-OPHID                                                          |
| MAPKAPK2 | MAPK14 | 0.1811496615409851    | Physical interactions  | IREF-OPHID<br>Varjosalo-Gstaiger-2013 A                             |
| KDR      | FLT1   | 0.09555456042289734   | Physical interactions  | IREF-OPHID                                                          |
| RXRG     | THRB   | 0.07476211339235306   | Physical interactions  | IREF-OPHID                                                          |
| RXRG     | PPARA  | 0.06852563470602036   | Physical interactions  | IREF-OPHID                                                          |
| RXRG     | PPARG  | 0.06532465666532516   | Physical interactions  | IREF-OPHID                                                          |
| CDK2     | ESR1   | 0.06213697791099548   | Physical interactions  | Cheng-Chen-2010                                                     |
| RXRB     | THRA   | 0.06198616698384285   | Physical interactions  | IREF-OPHID                                                          |
| RXRB     | THRB   | 0.05958951637148857   | Physical interactions  | IREF-OPHID                                                          |
| NR2C2    | ESR1   | 0.05004659295082092   | Physical interactions  | IREF-OPHID                                                          |
| NR2C1    | ESR1   | 0.042015619575977325  | Physical interactions  | IREF-OPHID                                                          |
| NR1H3    | PPARA  | 0.03901902586221695   | Physical interactions  | IREF-OPHID                                                          |
| NR1H3    | CDK2   | 0.01953577995300293   | Physical interactions  | IREF-OPHID                                                          |
| ESR2     | ESR1   | 0.011904633603990078  | Physical interactions  | IREF-OPHID                                                          |
| MAPKAPK2 | MAPK14 | 1.9786877632141113    | Predicted              | I2D-BioGRID-Fly2Human<br>I2D-IntAct-Fly2Human<br>I2D-MINT-Fly2Human |
| MAPK10   | DHODH  | 1.8117722272872925    | Predicted              | I2D-BioGRID-Fly2Human<br>I2D-IntAct-Fly2Human<br>I2D-MINT-Fly2Human |
| DPYD     | DHODH  | 0.8162329792976379    | Shared protein domains | INTERPRO<br>PFAM                                                    |
| MMP12    | MMP13  | 0.0866105854511261    | Shared protein domains | INTERPRO<br>PFAM                                                    |
| MMP3     | MMP13  | 0.08632494136691093   | Shared protein domains | INTERPRO                                                            |

|       |       |                      |                        | PFAM             |
|-------|-------|----------------------|------------------------|------------------|
| MMP12 | MMP3  | 0.08617567270994186  | Shared protein domains | INTERPRO<br>PFAM |
| FGFR2 | FGFR1 | 0.07727719098329544  | Shared protein domains | INTERPRO<br>PFAM |
| PPARA | PPARD | 0.06783170998096466  | Shared protein domains | INTERPRO<br>PFAM |
| NR1H3 | NR1H2 | 0.0676528736948967   | Shared protein domains | INTERPRO<br>PFAM |
| RORC  | RORA  | 0.0590713769197464   | Shared protein domains | INTERPRO<br>PFAM |
| NR1H3 | NR1H4 | 0.058772098273038864 | Shared protein domains | INTERPRO<br>PFAM |
| RARB  | RARG  | 0.05795972794294357  | Shared protein domains | INTERPRO<br>PFAM |
| NR1H2 | NR1H4 | 0.05715620517730713  | Shared protein domains | INTERPRO<br>PFAM |
| PPARG | PPARD | 0.055352840572595596 | Shared protein domains | INTERPRO<br>PFAM |
| PPARG | PPARA | 0.0553528256714344   | Shared protein domains | INTERPRO<br>PFAM |
| THRA  | NR1H2 | 0.052789557725191116 | Shared protein domains | INTERPRO<br>PFAM |
| RXRG  | RXRB  | 0.05268229357898235  | Shared protein domains | INTERPRO<br>PFAM |
| RARG  | RXRB  | 0.05182567797601223  | Shared protein domains | INTERPRO<br>PFAM |
| RARB  | THRA  | 0.0512840561568737   | Shared protein domains | INTERPRO<br>PFAM |
| RARB  | NR1H2 | 0.05060655251145363  | Shared protein domains | INTERPRO<br>PFAM |
| RARB  | RXRB  | 0.05018881894648075  | Shared protein domains | INTERPRO<br>PFAM |
| NR1I2 | THRB  | 0.04945397190749645  | Shared protein domains | INTERPRO<br>PFAM |
| NR1I3 | THRB  | 0.04945397190749645  | Shared protein domains | INTERPRO<br>PFAM |
| NR1I3 | NR1I2 | 0.04945397190749645  | Shared protein domains | INTERPRO<br>PFAM |
| THRB  | NR1H4 | 0.04901903308928013  | Shared protein domains | INTERPRO<br>PFAM |
| NR1I2 | NR1H4 | 0.04901903308928013  | Shared protein domains | INTERPRO<br>PFAM |
| NR1I3 | NR1H4 | 0.04901903308928013  | Shared protein domains | INTERPRO<br>PFAM |
| RORA  | THRB  | 0.04901314526796341  | Shared protein domains | INTERPRO<br>PFAM |
| RORA  | NR1I2 | 0.04901314526796341  | Shared protein domains | INTERPRO<br>PFAM |
| RORA  | NR1I3 | 0.04901314526796341  | Shared protein domains | INTERPRO<br>PFAM |
| RORC  | THRB  | 0.04901314526796341  | Shared protein domains | INTERPRO<br>PFAM |
| RORC  | NR1I2 | 0.04901314526796341  | Shared protein domains | INTERPRO<br>PFAM |
| RORC  | NR1I3 | 0.04901314526796341  | Shared protein domains | INTERPRO<br>PFAM |
| NR1H3 | THRB  | 0.04878928139805794  | Shared protein domains | INTERPRO<br>PFAM |
| NR1I2 | NR1H3 | 0.04878928139805794  | Shared protein domains | INTERPRO<br>PFAM |
| NR1I3 | NR1H3 | 0.04878928139805794  | Shared protein domains | INTERPRO         |

|       |       |                      |                        | PFAM             |
|-------|-------|----------------------|------------------------|------------------|
| RORA  | NR1H4 | 0.0485851988196373   | Shared protein domains | INTERPRO<br>PFAM |
| RORC  | NR1H4 | 0.0485851988196373   | Shared protein domains | INTERPRO<br>PFAM |
| RORA  | NR1H3 | 0.04835914261639118  | Shared protein domains | INTERPRO<br>PFAM |
| RORC  | NR1H3 | 0.04835914261639118  | Shared protein domains | INTERPRO<br>PFAM |
| THRA  | THRB  | 0.04821889474987984  | Shared protein domains | INTERPRO<br>PFAM |
| THRA  | NR1I2 | 0.04821889474987984  | Shared protein domains | INTERPRO<br>PFAM |
| NR1I3 | THRA  | 0.04821889474987984  | Shared protein domains | INTERPRO<br>PFAM |
| ESRRG | THRA  | 0.04807572811841965  | Shared protein domains | INTERPRO<br>PFAM |
| THRA  | NR1H4 | 0.04780355095863342  | Shared protein domains | INTERPRO<br>PFAM |
| RORA  | THRA  | 0.047797929495573044 | Shared protein domains | INTERPRO<br>PFAM |
| RORC  | THRA  | 0.047797929495573044 | Shared protein domains | INTERPRO<br>PFAM |
| ESRRG | RARG  | 0.047633757814764977 | Shared protein domains | INTERPRO<br>PFAM |
| NR1H2 | THRB  | 0.04761234484612942  | Shared protein domains | INTERPRO<br>PFAM |
| NR1I2 | NR1H2 | 0.04761234484612942  | Shared protein domains | INTERPRO<br>PFAM |
| NR1I3 | NR1H2 | 0.04761234484612942  | Shared protein domains | INTERPRO<br>PFAM |
| THRA  | NR1H3 | 0.04758414998650551  | Shared protein domains | INTERPRO<br>PFAM |
| ESRRG | RXRB  | 0.04753287136554718  | Shared protein domains | INTERPRO<br>PFAM |
| ESRRG | NR1H2 | 0.04747248813509941  | Shared protein domains | INTERPRO<br>PFAM |
| RORA  | NR1H2 | 0.047201132401824    | Shared protein domains | INTERPRO<br>PFAM |
| RORC  | NR1H2 | 0.047201132401824    | Shared protein domains | INTERPRO<br>PFAM |
| RARB  | THRB  | 0.04636017791926861  | Shared protein domains | INTERPRO<br>PFAM |
| RARB  | NR1I2 | 0.04636017791926861  | Shared protein domains | INTERPRO<br>PFAM |
| RARB  | NR1I3 | 0.04636017791926861  | Shared protein domains | INTERPRO<br>PFAM |
| FLT1  | FGFR1 | 0.046316420659422874 | Shared protein domains | INTERPRO<br>PFAM |
| FLT1  | FGFR2 | 0.046316420659422874 | Shared protein domains | INTERPRO<br>PFAM |
| ESRRG | RARB  | 0.04622715339064598  | Shared protein domains | INTERPRO<br>PFAM |
| RARG  | THRA  | 0.04609023965895176  | Shared protein domains | INTERPRO<br>PFAM |
| RARG  | RXRG  | 0.04608701542019844  | Shared protein domains | INTERPRO<br>PFAM |
| RXRB  | THRA  | 0.0459954347461462   | Shared protein domains | INTERPRO<br>PFAM |
| RARB  | NR1H4 | 0.04597432538866997  | Shared protein domains | INTERPRO<br>PFAM |
| RARB  | RORA  | 0.045969102531671524 | Shared protein domains | INTERPRO<br>PFAM |

|       |       |                      |                        |                  |
|-------|-------|----------------------|------------------------|------------------|
| RARB  | RORC  | 0.045969102531671524 | Shared protein domains | INTERPRO<br>PFAM |
| RARB  | NR1H3 | 0.04577050171792507  | Shared protein domains | INTERPRO<br>PFAM |
| RARG  | NR1H2 | 0.04553300328552723  | Shared protein domains | INTERPRO<br>PFAM |
| RXRB  | NR1H2 | 0.045440396293997765 | Shared protein domains | INTERPRO<br>PFAM |
| RARB  | RXRG  | 0.04474376514554024  | Shared protein domains | INTERPRO<br>PFAM |
| KDR   | FGFR1 | 0.04466992802917957  | Shared protein domains | INTERPRO<br>PFAM |
| KDR   | FGFR2 | 0.04466992802917957  | Shared protein domains | INTERPRO<br>PFAM |
| NR2C1 | NR1D1 | 0.044550810009241104 | Shared protein domains | INTERPRO<br>PFAM |
| NR2C2 | NR1D1 | 0.044550810009241104 | Shared protein domains | INTERPRO<br>PFAM |
| NR2C2 | NR2C1 | 0.044550810009241104 | Shared protein domains | INTERPRO<br>PFAM |
| ESRRA | NR1D1 | 0.044550810009241104 | Shared protein domains | INTERPRO<br>PFAM |
| ESRRA | NR2C1 | 0.044550810009241104 | Shared protein domains | INTERPRO<br>PFAM |
| ESRRA | NR2C2 | 0.044550810009241104 | Shared protein domains | INTERPRO<br>PFAM |
| NR1D2 | NR1D1 | 0.044550810009241104 | Shared protein domains | INTERPRO<br>PFAM |
| NR1D2 | NR2C1 | 0.044550810009241104 | Shared protein domains | INTERPRO<br>PFAM |
| NR1D2 | NR2C2 | 0.044550810009241104 | Shared protein domains | INTERPRO<br>PFAM |
| NR1D2 | ESRRA | 0.044550810009241104 | Shared protein domains | INTERPRO<br>PFAM |
| NR1D1 | ESR1  | 0.04455075040459633  | Shared protein domains | INTERPRO<br>PFAM |
| NR2C1 | ESR1  | 0.04455075040459633  | Shared protein domains | INTERPRO<br>PFAM |
| NR2C2 | ESR1  | 0.04455075040459633  | Shared protein domains | INTERPRO<br>PFAM |
| ESRRA | ESR1  | 0.04455075040459633  | Shared protein domains | INTERPRO<br>PFAM |
| NR1D2 | ESR1  | 0.04455075040459633  | Shared protein domains | INTERPRO<br>PFAM |
| PGR   | NR1D1 | 0.04455075040459633  | Shared protein domains | INTERPRO<br>PFAM |
| PGR   | NR2C1 | 0.04455075040459633  | Shared protein domains | INTERPRO<br>PFAM |
| PGR   | NR2C2 | 0.04455075040459633  | Shared protein domains | INTERPRO<br>PFAM |
| PGR   | ESRRA | 0.04455075040459633  | Shared protein domains | INTERPRO<br>PFAM |
| PGR   | NR1D2 | 0.04455075040459633  | Shared protein domains | INTERPRO<br>PFAM |
| ESR2  | NR1D1 | 0.04455075040459633  | Shared protein domains | INTERPRO<br>PFAM |
| ESR2  | NR2C1 | 0.04455075040459633  | Shared protein domains | INTERPRO<br>PFAM |
| ESR2  | NR2C2 | 0.04455075040459633  | Shared protein domains | INTERPRO<br>PFAM |
| ESR2  | ESRRA | 0.04455075040459633  | Shared protein domains | INTERPRO<br>PFAM |

|       |       |                      |                        |                  |
|-------|-------|----------------------|------------------------|------------------|
| ESR2  | NR1D2 | 0.04455075040459633  | Shared protein domains | INTERPRO<br>PFAM |
| PGR   | ESR1  | 0.044550696387887    | Shared protein domains | INTERPRO<br>PFAM |
| ESR2  | ESR1  | 0.044550696387887    | Shared protein domains | INTERPRO<br>PFAM |
| ESR2  | PGR   | 0.044550696387887    | Shared protein domains | INTERPRO<br>PFAM |
| NR1D1 | PPARG | 0.04414699785411358  | Shared protein domains | INTERPRO<br>PFAM |
| NR2C1 | PPARG | 0.04414699785411358  | Shared protein domains | INTERPRO<br>PFAM |
| NR2C2 | PPARG | 0.04414699785411358  | Shared protein domains | INTERPRO<br>PFAM |
| ESRRA | PPARG | 0.04414699785411358  | Shared protein domains | INTERPRO<br>PFAM |
| NR1D2 | PPARG | 0.04414699785411358  | Shared protein domains | INTERPRO<br>PFAM |
| ESR1  | PPARG | 0.04414694383740425  | Shared protein domains | INTERPRO<br>PFAM |
| PGR   | PPARG | 0.04414694383740425  | Shared protein domains | INTERPRO<br>PFAM |
| ESR2  | PPARG | 0.04414694383740425  | Shared protein domains | INTERPRO<br>PFAM |
| NR1D1 | PPARA | 0.04393242485821247  | Shared protein domains | INTERPRO<br>PFAM |
| NR2C1 | PPARA | 0.04393242485821247  | Shared protein domains | INTERPRO<br>PFAM |
| NR2C2 | PPARA | 0.04393242485821247  | Shared protein domains | INTERPRO<br>PFAM |
| ESRRA | PPARA | 0.04393242485821247  | Shared protein domains | INTERPRO<br>PFAM |
| NR1D2 | PPARA | 0.04393242485821247  | Shared protein domains | INTERPRO<br>PFAM |
| NR1D1 | PPARD | 0.04393240436911583  | Shared protein domains | INTERPRO<br>PFAM |
| NR2C1 | PPARD | 0.04393240436911583  | Shared protein domains | INTERPRO<br>PFAM |
| NR2C2 | PPARD | 0.04393240436911583  | Shared protein domains | INTERPRO<br>PFAM |
| ESRRA | PPARD | 0.04393240436911583  | Shared protein domains | INTERPRO<br>PFAM |
| NR1D2 | PPARD | 0.04393240436911583  | Shared protein domains | INTERPRO<br>PFAM |
| ESR1  | PPARA | 0.043932365253567696 | Shared protein domains | INTERPRO<br>PFAM |
| PGR   | PPARA | 0.043932365253567696 | Shared protein domains | INTERPRO<br>PFAM |
| ESR2  | PPARA | 0.043932365253567696 | Shared protein domains | INTERPRO<br>PFAM |
| ESR1  | PPARD | 0.0439323466271162   | Shared protein domains | INTERPRO<br>PFAM |
| PGR   | PPARD | 0.0439323466271162   | Shared protein domains | INTERPRO<br>PFAM |
| ESR2  | PPARD | 0.0439323466271162   | Shared protein domains | INTERPRO<br>PFAM |
| F2    | F10   | 0.04362805373966694  | Shared protein domains | INTERPRO<br>PFAM |
| ESRRG | NR1D1 | 0.0434532705694437   | Shared protein domains | INTERPRO<br>PFAM |
| ESRRG | NR2C1 | 0.0434532705694437   | Shared protein domains | INTERPRO<br>PFAM |

|       |       |                      |                        |                  |
|-------|-------|----------------------|------------------------|------------------|
| ESRRG | NR2C2 | 0.0434532705694437   | Shared protein domains | INTERPRO<br>PFAM |
| ESRRG | ESRRA | 0.0434532705694437   | Shared protein domains | INTERPRO<br>PFAM |
| ESRRG | NR1D2 | 0.0434532705694437   | Shared protein domains | INTERPRO<br>PFAM |
| ESRRG | ESR1  | 0.04345321282744408  | Shared protein domains | INTERPRO<br>PFAM |
| ESRRG | PGR   | 0.04345321282744408  | Shared protein domains | INTERPRO<br>PFAM |
| ESR2  | ESRRG | 0.04345321282744408  | Shared protein domains | INTERPRO<br>PFAM |
| NR1D1 | THRB  | 0.043111249804496765 | Shared protein domains | INTERPRO<br>PFAM |
| NR1D1 | NR1I2 | 0.043111249804496765 | Shared protein domains | INTERPRO<br>PFAM |
| NR1D1 | NR1I3 | 0.043111249804496765 | Shared protein domains | INTERPRO<br>PFAM |
| NR2C1 | THRB  | 0.043111249804496765 | Shared protein domains | INTERPRO<br>PFAM |
| NR2C1 | NR1I2 | 0.043111249804496765 | Shared protein domains | INTERPRO<br>PFAM |
| NR2C1 | NR1I3 | 0.043111249804496765 | Shared protein domains | INTERPRO<br>PFAM |
| NR2C2 | THRB  | 0.043111249804496765 | Shared protein domains | INTERPRO<br>PFAM |
| NR2C2 | NR1I2 | 0.043111249804496765 | Shared protein domains | INTERPRO<br>PFAM |
| NR2C2 | NR1I3 | 0.043111249804496765 | Shared protein domains | INTERPRO<br>PFAM |
| ESRRA | THRB  | 0.043111249804496765 | Shared protein domains | INTERPRO<br>PFAM |
| ESRRA | NR1I2 | 0.043111249804496765 | Shared protein domains | INTERPRO<br>PFAM |
| ESRRA | NR1I3 | 0.043111249804496765 | Shared protein domains | INTERPRO<br>PFAM |
| NR1D2 | THRB  | 0.043111249804496765 | Shared protein domains | INTERPRO<br>PFAM |
| NR1D2 | NR1I2 | 0.043111249804496765 | Shared protein domains | INTERPRO<br>PFAM |
| NR1D2 | NR1I3 | 0.043111249804496765 | Shared protein domains | INTERPRO<br>PFAM |
| ESR1  | THRB  | 0.04311119206249714  | Shared protein domains | INTERPRO<br>PFAM |
| NR1I2 | ESR1  | 0.04311119206249714  | Shared protein domains | INTERPRO<br>PFAM |
| NR1I3 | ESR1  | 0.04311119206249714  | Shared protein domains | INTERPRO<br>PFAM |
| PGR   | THRB  | 0.04311119206249714  | Shared protein domains | INTERPRO<br>PFAM |
| PGR   | NR1I2 | 0.04311119206249714  | Shared protein domains | INTERPRO<br>PFAM |
| PGR   | NR1I3 | 0.04311119206249714  | Shared protein domains | INTERPRO<br>PFAM |
| ESR2  | THRB  | 0.04311119206249714  | Shared protein domains | INTERPRO<br>PFAM |
| ESR2  | NR1I2 | 0.04311119206249714  | Shared protein domains | INTERPRO<br>PFAM |
| ESR2  | NR1I3 | 0.04311119206249714  | Shared protein domains | INTERPRO<br>PFAM |
| ESRRG | PPARG | 0.04306914657354355  | Shared protein domains | INTERPRO<br>PFAM |

|       |       |                      |                        |                  |
|-------|-------|----------------------|------------------------|------------------|
| ESRRG | PPARA | 0.04286503791809082  | Shared protein domains | INTERPRO<br>PFAM |
| ESRRG | PPARD | 0.04286501742899418  | Shared protein domains | INTERPRO<br>PFAM |
| NR1D1 | NR1H4 | 0.042776890099048615 | Shared protein domains | INTERPRO<br>PFAM |
| NR2C1 | NR1H4 | 0.042776890099048615 | Shared protein domains | INTERPRO<br>PFAM |
| NR2C2 | NR1H4 | 0.042776890099048615 | Shared protein domains | INTERPRO<br>PFAM |
| ESRRA | NR1H4 | 0.042776890099048615 | Shared protein domains | INTERPRO<br>PFAM |
| NR1D2 | NR1H4 | 0.042776890099048615 | Shared protein domains | INTERPRO<br>PFAM |
| ESR1  | NR1H4 | 0.04277683235704899  | Shared protein domains | INTERPRO<br>PFAM |
| PGR   | NR1H4 | 0.04277683235704899  | Shared protein domains | INTERPRO<br>PFAM |
| ESR2  | NR1H4 | 0.04277683235704899  | Shared protein domains | INTERPRO<br>PFAM |
| RORA  | NR1D1 | 0.04277236387133598  | Shared protein domains | INTERPRO<br>PFAM |
| RORA  | NR2C1 | 0.04277236387133598  | Shared protein domains | INTERPRO<br>PFAM |
| RORC  | NR1D1 | 0.04277236387133598  | Shared protein domains | INTERPRO<br>PFAM |
| RORC  | NR2C1 | 0.04277236387133598  | Shared protein domains | INTERPRO<br>PFAM |
| NR2C2 | RORA  | 0.04277236387133598  | Shared protein domains | INTERPRO<br>PFAM |
| NR2C2 | RORC  | 0.04277236387133598  | Shared protein domains | INTERPRO<br>PFAM |
| ESRRA | RORA  | 0.04277236387133598  | Shared protein domains | INTERPRO<br>PFAM |
| ESRRA | RORC  | 0.04277236387133598  | Shared protein domains | INTERPRO<br>PFAM |
| NR1D2 | RORA  | 0.04277236387133598  | Shared protein domains | INTERPRO<br>PFAM |
| NR1D2 | RORC  | 0.04277236387133598  | Shared protein domains | INTERPRO<br>PFAM |
| RORA  | ESR1  | 0.042772307991981506 | Shared protein domains | INTERPRO<br>PFAM |
| RORC  | ESR1  | 0.042772307991981506 | Shared protein domains | INTERPRO<br>PFAM |
| PGR   | RORA  | 0.042772307991981506 | Shared protein domains | INTERPRO<br>PFAM |
| PGR   | RORC  | 0.042772307991981506 | Shared protein domains | INTERPRO<br>PFAM |
| ESR2  | RORA  | 0.042772307991981506 | Shared protein domains | INTERPRO<br>PFAM |
| ESR2  | RORC  | 0.042772307991981506 | Shared protein domains | INTERPRO<br>PFAM |
| PPARG | THRB  | 0.04273326136171818  | Shared protein domains | INTERPRO<br>PFAM |
| NR1I2 | PPARG | 0.04273326136171818  | Shared protein domains | INTERPRO<br>PFAM |
| NR1I3 | PPARG | 0.04273326136171818  | Shared protein domains | INTERPRO<br>PFAM |
| NR1D1 | NR1H3 | 0.04260025918483734  | Shared protein domains | INTERPRO<br>PFAM |
| NR2C1 | NR1H3 | 0.04260025918483734  | Shared protein domains | INTERPRO<br>PFAM |
| NR2C2 | NR1H3 | 0.04260025918483734  | Shared protein domains | INTERPRO         |

|       |       |                      |                        | PFAM             |
|-------|-------|----------------------|------------------------|------------------|
| ESRRA | NR1H3 | 0.04260025918483734  | Shared protein domains | INTERPRO<br>PFAM |
| NR1D2 | NR1H3 | 0.04260025918483734  | Shared protein domains | INTERPRO<br>PFAM |
| NR1H3 | ESR1  | 0.042600203305482864 | Shared protein domains | INTERPRO<br>PFAM |
| PGR   | NR1H3 | 0.042600203305482864 | Shared protein domains | INTERPRO<br>PFAM |
| ESR2  | NR1H3 | 0.042600203305482864 | Shared protein domains | INTERPRO<br>PFAM |
| THRB  | PPARA | 0.04253241419792175  | Shared protein domains | INTERPRO<br>PFAM |
| NR1I2 | PPARA | 0.04253241419792175  | Shared protein domains | INTERPRO<br>PFAM |
| NR1I3 | PPARA | 0.04253241419792175  | Shared protein domains | INTERPRO<br>PFAM |
| THRB  | PPARD | 0.04253239370882511  | Shared protein domains | INTERPRO<br>PFAM |
| NR1I2 | PPARD | 0.04253239370882511  | Shared protein domains | INTERPRO<br>PFAM |
| NR1I3 | PPARD | 0.04253239370882511  | Shared protein domains | INTERPRO<br>PFAM |
| PPARG | NR1H4 | 0.0424048975110054   | Shared protein domains | INTERPRO<br>PFAM |
| RORA  | PPARG | 0.04240045323967934  | Shared protein domains | INTERPRO<br>PFAM |
| RORC  | PPARG | 0.04240045323967934  | Shared protein domains | INTERPRO<br>PFAM |
| NR1H3 | PPARG | 0.04223143681883812  | Shared protein domains | INTERPRO<br>PFAM |
| PPARA | NR1H4 | 0.04220723733305931  | Shared protein domains | INTERPRO<br>PFAM |
| PPARD | NR1H4 | 0.04220722056925297  | Shared protein domains | INTERPRO<br>PFAM |
| RORA  | PPARA | 0.04220283776521683  | Shared protein domains | INTERPRO<br>PFAM |
| RORC  | PPARA | 0.04220283776521683  | Shared protein domains | INTERPRO<br>PFAM |
| RORA  | PPARD | 0.042202819138765335 | Shared protein domains | INTERPRO<br>PFAM |
| RORC  | PPARD | 0.042202819138765335 | Shared protein domains | INTERPRO<br>PFAM |
| NR1D1 | THRA  | 0.04216170869767666  | Shared protein domains | INTERPRO<br>PFAM |
| NR2C1 | THRA  | 0.04216170869767666  | Shared protein domains | INTERPRO<br>PFAM |
| NR2C2 | THRA  | 0.04216170869767666  | Shared protein domains | INTERPRO<br>PFAM |
| ESRRA | THRA  | 0.04216170869767666  | Shared protein domains | INTERPRO<br>PFAM |
| NR1D2 | THRA  | 0.04216170869767666  | Shared protein domains | INTERPRO<br>PFAM |
| THRA  | ESR1  | 0.04216165281832218  | Shared protein domains | INTERPRO<br>PFAM |
| PGR   | THRA  | 0.04216165281832218  | Shared protein domains | INTERPRO<br>PFAM |
| ESR2  | THRA  | 0.04216165281832218  | Shared protein domains | INTERPRO<br>PFAM |
| RXRG  | NR1D1 | 0.04209457151591778  | Shared protein domains | INTERPRO<br>PFAM |
| RXRG  | NR2C1 | 0.04209457151591778  | Shared protein domains | INTERPRO<br>PFAM |



|       |       |                      |                        |                  |
|-------|-------|----------------------|------------------------|------------------|
| RXRG  | NR2C2 | 0.04209457151591778  | Shared protein domains | INTERPRO<br>PFAM |
| ESRRA | RXRG  | 0.04209457151591778  | Shared protein domains | INTERPRO<br>PFAM |
| NR1D2 | RXRG  | 0.04209457151591778  | Shared protein domains | INTERPRO<br>PFAM |
| RXRG  | ESR1  | 0.04209451377391815  | Shared protein domains | INTERPRO<br>PFAM |
| PGR   | RXRG  | 0.04209451377391815  | Shared protein domains | INTERPRO<br>PFAM |
| ESR2  | RXRG  | 0.04209451377391815  | Shared protein domains | INTERPRO<br>PFAM |
| ESRRG | THRB  | 0.042083900421857834 | Shared protein domains | INTERPRO<br>PFAM |
| ESRRG | NR1I2 | 0.042083900421857834 | Shared protein domains | INTERPRO<br>PFAM |
| ESRRG | NR1I3 | 0.042083900421857834 | Shared protein domains | INTERPRO<br>PFAM |
| NR1H3 | PPARA | 0.042035460472106934 | Shared protein domains | INTERPRO<br>PFAM |
| NR1H3 | PPARD | 0.04203544370830059  | Shared protein domains | INTERPRO<br>PFAM |
| RARG  | NR1D1 | 0.04181999713182449  | Shared protein domains | INTERPRO<br>PFAM |
| RARG  | NR2C1 | 0.04181999713182449  | Shared protein domains | INTERPRO<br>PFAM |
| RARG  | NR2C2 | 0.04181999713182449  | Shared protein domains | INTERPRO<br>PFAM |
| RARG  | ESRRA | 0.04181999713182449  | Shared protein domains | INTERPRO<br>PFAM |
| RARG  | NR1D2 | 0.04181999713182449  | Shared protein domains | INTERPRO<br>PFAM |
| RARG  | ESR1  | 0.041819941252470016 | Shared protein domains | INTERPRO<br>PFAM |
| PGR   | RARG  | 0.041819941252470016 | Shared protein domains | INTERPRO<br>PFAM |
| ESR2  | RARG  | 0.041819941252470016 | Shared protein domains | INTERPRO<br>PFAM |
| THRA  | PPARG | 0.04180075228214264  | Shared protein domains | INTERPRO<br>PFAM |
| ESRRG | NR1H4 | 0.0417658444494009   | Shared protein domains | INTERPRO<br>PFAM |
| ESRRG | RORA  | 0.04176153987646103  | Shared protein domains | INTERPRO<br>PFAM |
| ESRRG | RORC  | 0.04176153987646103  | Shared protein domains | INTERPRO<br>PFAM |
| NR1D1 | RXRB  | 0.041741929948329926 | Shared protein domains | INTERPRO<br>PFAM |
| NR2C1 | RXRB  | 0.041741929948329926 | Shared protein domains | INTERPRO<br>PFAM |
| NR2C2 | RXRB  | 0.041741929948329926 | Shared protein domains | INTERPRO<br>PFAM |
| ESRRA | RXRB  | 0.041741929948329926 | Shared protein domains | INTERPRO<br>PFAM |
| NR1D2 | RXRB  | 0.041741929948329926 | Shared protein domains | INTERPRO<br>PFAM |
| RXRB  | ESR1  | 0.0417418722063303   | Shared protein domains | INTERPRO<br>PFAM |
| PGR   | RXRB  | 0.0417418722063303   | Shared protein domains | INTERPRO<br>PFAM |
| ESR2  | RXRB  | 0.0417418722063303   | Shared protein domains | INTERPRO<br>PFAM |

|       |       |                      |                        |                  |
|-------|-------|----------------------|------------------------|------------------|
| RXRG  | PPARG | 0.04172775335609913  | Shared protein domains | INTERPRO<br>PFAM |
| NR1D1 | NR1H2 | 0.04169541597366333  | Shared protein domains | INTERPRO<br>PFAM |
| NR2C1 | NR1H2 | 0.04169541597366333  | Shared protein domains | INTERPRO<br>PFAM |
| NR2C2 | NR1H2 | 0.04169541597366333  | Shared protein domains | INTERPRO<br>PFAM |
| ESRRA | NR1H2 | 0.04169541597366333  | Shared protein domains | INTERPRO<br>PFAM |
| NR1D2 | NR1H2 | 0.04169541597366333  | Shared protein domains | INTERPRO<br>PFAM |
| ESR1  | NR1H2 | 0.041695361956954    | Shared protein domains | INTERPRO<br>PFAM |
| PGR   | NR1H2 | 0.041695361956954    | Shared protein domains | INTERPRO<br>PFAM |
| ESR2  | NR1H2 | 0.041695361956954    | Shared protein domains | INTERPRO<br>PFAM |
| THRA  | PPARA | 0.04160895571112633  | Shared protein domains | INTERPRO<br>PFAM |
| THRA  | PPARD | 0.041608940809965134 | Shared protein domains | INTERPRO<br>PFAM |
| ESRRG | NR1H3 | 0.04159782640635967  | Shared protein domains | INTERPRO<br>PFAM |
| RXRG  | PPARA | 0.041532840579748154 | Shared protein domains | INTERPRO<br>PFAM |
| RXRG  | PPARD | 0.04153282009065151  | Shared protein domains | INTERPRO<br>PFAM |
| RARG  | PPARG | 0.04146517068147659  | Shared protein domains | INTERPRO<br>PFAM |
| RXRB  | PPARG | 0.0413885023444891   | Shared protein domains | INTERPRO<br>PFAM |
| NR1H2 | PPARG | 0.04134282469749451  | Shared protein domains | INTERPRO<br>PFAM |
| RARG  | PPARA | 0.041276633739471436 | Shared protein domains | INTERPRO<br>PFAM |
| RARG  | PPARD | 0.04127661697566509  | Shared protein domains | INTERPRO<br>PFAM |
| RXRB  | PPARA | 0.04120070859789848  | Shared protein domains | INTERPRO<br>PFAM |
| RXRB  | PPARD | 0.04120069183409214  | Shared protein domains | INTERPRO<br>PFAM |
| NR1H2 | PPARA | 0.04115547426044941  | Shared protein domains | INTERPRO<br>PFAM |
| NR1H2 | PPARD | 0.041155459359288216 | Shared protein domains | INTERPRO<br>PFAM |
| ESRRG | RXRG  | 0.04109758138656616  | Shared protein domains | INTERPRO<br>PFAM |
| RXRG  | THRB  | 0.04078689590096474  | Shared protein domains | INTERPRO<br>PFAM |
| RXRG  | NR1I2 | 0.04078689590096474  | Shared protein domains | INTERPRO<br>PFAM |
| RXRG  | NR1I3 | 0.04078689590096474  | Shared protein domains | INTERPRO<br>PFAM |
| RARB  | NR1D1 | 0.040732767432928085 | Shared protein domains | INTERPRO<br>PFAM |
| RARB  | NR2C1 | 0.040732767432928085 | Shared protein domains | INTERPRO<br>PFAM |
| RARB  | NR2C2 | 0.040732767432928085 | Shared protein domains | INTERPRO<br>PFAM |
| RARB  | ESRRA | 0.040732767432928085 | Shared protein domains | INTERPRO<br>PFAM |

|          |        |                      |                        |                  |
|----------|--------|----------------------|------------------------|------------------|
| RARB     | NR1D2  | 0.040732767432928085 | Shared protein domains | INTERPRO<br>PFAM |
| RARB     | ESR1   | 0.04073271155357361  | Shared protein domains | INTERPRO<br>PFAM |
| PGR      | RARB   | 0.04073271155357361  | Shared protein domains | INTERPRO<br>PFAM |
| ESR2     | RARB   | 0.04073271155357361  | Shared protein domains | INTERPRO<br>PFAM |
| RARG     | THRB   | 0.0405550803989172   | Shared protein domains | INTERPRO<br>PFAM |
| RARG     | NR1I2  | 0.0405550803989172   | Shared protein domains | INTERPRO<br>PFAM |
| RARG     | NR1I3  | 0.0405550803989172   | Shared protein domains | INTERPRO<br>PFAM |
| RXRG     | NR1H4  | 0.04048316739499569  | Shared protein domains | INTERPRO<br>PFAM |
| RXRB     | THRB   | 0.04048200510442257  | Shared protein domains | INTERPRO<br>PFAM |
| RXRB     | NR1I2  | 0.04048200510442257  | Shared protein domains | INTERPRO<br>PFAM |
| NR1I3    | RXRB   | 0.04048200510442257  | Shared protein domains | INTERPRO<br>PFAM |
| RXRG     | RORA   | 0.04047905653715134  | Shared protein domains | INTERPRO<br>PFAM |
| RXRG     | RORC   | 0.04047905653715134  | Shared protein domains | INTERPRO<br>PFAM |
| RARB     | PPARG  | 0.04039744287729263  | Shared protein domains | INTERPRO<br>PFAM |
| RXRG     | NR1H3  | 0.040322719141840935 | Shared protein domains | INTERPRO<br>PFAM |
| RARG     | NR1H4  | 0.04026128351688385  | Shared protein domains | INTERPRO<br>PFAM |
| RARG     | RORA   | 0.04025730863213539  | Shared protein domains | INTERPRO<br>PFAM |
| RARG     | RORC   | 0.04025730863213539  | Shared protein domains | INTERPRO<br>PFAM |
| RARB     | PPARA  | 0.040219271555542946 | Shared protein domains | INTERPRO<br>PFAM |
| RARB     | PPARD  | 0.0402192547917366   | Shared protein domains | INTERPRO<br>PFAM |
| RXRB     | NR1H4  | 0.04018936678767204  | Shared protein domains | INTERPRO<br>PFAM |
| RORA     | RXRB   | 0.04018540680408478  | Shared protein domains | INTERPRO<br>PFAM |
| RORC     | RXRB   | 0.04018540680408478  | Shared protein domains | INTERPRO<br>PFAM |
| RARG     | NR1H3  | 0.04010608233511448  | Shared protein domains | INTERPRO<br>PFAM |
| RXRB     | NR1H3  | 0.04003477841615677  | Shared protein domains | INTERPRO<br>PFAM |
| RXRG     | THRA   | 0.03992434777319431  | Shared protein domains | INTERPRO<br>PFAM |
| RXRG     | NR1H2  | 0.039500774815678596 | Shared protein domains | INTERPRO<br>PFAM |
| KDR      | FLT1   | 0.038302602246403694 | Shared protein domains | INTERPRO<br>PFAM |
| MAPKAPK2 | MAPK14 | 0.015003179665654898 | Shared protein domains | INTERPRO<br>PFAM |
| MAPKAPK2 | MAPK10 | 0.014965989161282778 | Shared protein domains | INTERPRO<br>PFAM |
| MAPK14   | MAPK10 | 0.014837779570370913 | Shared protein domains | INTERPRO<br>PFAM |
| MAPKAPK2 | GSK3B  | 0.006023443071171641 | Shared protein domains | INTERPRO         |

|          |        |                       |                        | PFAM             |
|----------|--------|-----------------------|------------------------|------------------|
| MAPKAPK2 | CDK9   | 0.006023443071171641  | Shared protein domains | INTERPRO<br>PFAM |
| MAPKAPK2 | CDK2   | 0.006015064660459757  | Shared protein domains | INTERPRO<br>PFAM |
| MAPK14   | GSK3B  | 0.005969909252598882  | Shared protein domains | INTERPRO<br>PFAM |
| MAPK14   | CDK9   | 0.005969909252598882  | Shared protein domains | INTERPRO<br>PFAM |
| CDK2     | MAPK14 | 0.00596166867762804   | Shared protein domains | INTERPRO<br>PFAM |
| MAPK10   | GSK3B  | 0.005955187603831291  | Shared protein domains | INTERPRO<br>PFAM |
| CDK9     | MAPK10 | 0.005955187603831291  | Shared protein domains | INTERPRO<br>PFAM |
| CDK2     | MAPK10 | 0.0059469640254974365 | Shared protein domains | INTERPRO<br>PFAM |
| CDK9     | GSK3B  | 0.004580185515806079  | Shared protein domains | INTERPRO<br>PFAM |
| CDK2     | GSK3B  | 0.004574882099404931  | Shared protein domains | INTERPRO<br>PFAM |
| CDK2     | CDK9   | 0.004574882099404931  | Shared protein domains | INTERPRO<br>PFAM |

Search results generated by the GeneMANIA algorithm ([genemania.org](http://genemania.org))
